# Supplementary material for: Synthesis, study of antileishmanial and antitrypanosomal activity of imidazo pyridine fused triazole analogues
Source: PubMed Central journal article supplement — RSC Adv. 2020 Oct 19;10(63):38328–43. doi: 10.1039/d0ra07881f (PMC9057266; doi:10.1039/d0ra07881f), 2020-10-19
Supplement: RA-010-D0RA07881F-s001.pdf [file RA-010-D0RA07881F-s001.pdf]

## Synthesis, study of antileishmanial and antitrypanosomal activity of imidazo pyridine fused triazole analogues

Ainarayana Nandikolla,<sup>[a]</sup> Singireddi Srinivasarao,<sup>[a]</sup> Banoth Karan Kumar,<sup>[b]</sup> Sankaranarayanan Murugesan,<sup>[b]</sup> Himanshu Aggarwal,<sup>[a]</sup> Louise L. Major,<sup>[c]</sup> Terry K. Smith<sup>[c]</sup> and Kondapalli Venkata Gowri Chandra Sekhar\*<sup>[a]</sup>

<sup>a</sup>*Department of Chemistry, Birla Institute of Technology and Science, Pilani, Hyderabad Campus, Jawahar Nagar, Kapra Mandal, Hyderabad – 500078, Telangana, India.*

<sup>b</sup>*Medicinal Chemistry Research Laboratory, Department of Pharmacy, Birla Institute of Technology and Science Pilani, Pilani Campus, Pilani-333031, Rajasthan. India.*

<sup>c</sup>*Schools of Biology & Chemistry, BSRC, The University, St. Andrews, Fife Scotland. KY16 9ST, UK.*

| <b>Contents:</b>                         | <b>Page</b> |
|------------------------------------------|-------------|
| 1. Materials and methods                 | S2          |
| 2. General Procedure and analytical Data | S2          |
| 3. Biological Procedures                 | S5          |
| 4. Molecular docking study               | S7          |
| 5. X-ray crystallographic studies        | S9          |
| 6. <sup>1</sup> H NMR Spectras           | S11         |
| 7. <sup>13</sup> C NMR Spectras          | S41         |
| 8. Mass spectras                         | S64         |
| 9. References                            | S99         |

### Experimental section

#### ***1. Materials and methods***

\*Corresponding author

Tel.: +91 40 66303527; E-mail: kvgc@hyderabad.bits-pilani.ac.in; kvgcs.bits@gmail.com

All chemical reagents and solvents are purchased from Aldrich, Alfa Aesar, Finar. The solvents and reagents were of LR grade. All the solvents were dried and distilled before use. Thin-layer chromatography (TLC) was carried out on aluminium-supported silica gel plates (Merck 60 F254) with visualization of components by UV light (254 nm). Column chromatography was carried out on silica gel (Merck 100-200 mesh). <sup>1</sup>H NMR and <sup>13</sup>C NMR spectra were recorded at 400 MHz and 101 MHz respectively using a Bruker AV 400 spectrometer (Bruker CO., Switzerland) in CDCl<sub>3</sub> and DMSO-*d*<sub>6</sub> solution with tetramethylsilane as the internal standard and chemical shift values ( $\delta$ ) were given in ppm. <sup>1</sup>H NMR spectra were recorded in CDCl<sub>3</sub> or DMSO-*d*<sub>6</sub>. The following abbreviations are used to designate multiplicities: s = singlet, d = doublet, t = triplet, m = multiplet, br = broad. Melting points were determined on an electro thermal melting point apparatus (Stuart-SMP30) in open capillary tubes and are uncorrected. Elemental analyses were performed by ElementarAnalysensysteme GmbH vario MICRO cube CHN Analyzer. Mass spectra (ESI-MS) were recorded on Shimadzu LCMS 8040 MS/ESI mass spectrometer.

## ***2. General Procedure and analytical Data***

### ***Representative procedure for the synthesis of compounds 2a and 2b***

General procedure for preparation of **2a** and **2b** from **1a** and **1b**:

A solution of 2-amino-4-picoline (**1a**) (10.0 g, 91.5 mmol) and ethyl-2-chloroacetoacetate (7.93 g, 45.8 mmol) were dissolved in 92 mL of 1,2-dimethoxyethane (DME) and heated for 36 h at reflux. The precipitated 2-amino-4-picoline hydrochloride salt was collected through filtration and washed with hexane. The filtrate liquor was concentrated in vacuo and residue was dissolved in CH<sub>2</sub>Cl<sub>2</sub> and washed with 5% acetic acid solution (2×) and brine. The organic layer was dried over anhydrous sodium sulfate (Na<sub>2</sub>SO<sub>4</sub>) and then concentrated under reduced pressure. The Crude material was purified by silica gel column chromatography with 20% ethyl acetate: CH<sub>2</sub>Cl<sub>2</sub> solvent system to yield 7.6 g (76%) of ethyl 2,7-dimethylimidazo[1,2-a]pyridine-3-carboxylate (**1b**) as a tan solid. mp 59-61°C; <sup>1</sup>H NMR (300 MHz, CDCl<sub>3</sub>) 9.14  $\delta$  (d, J= 7.1 Hz, 1H), 7.34 (s, 1H), 6.78 (dd, J= 7.1, 1.7 Hz,

1H), 4.40 (q,  $J= 7.1, 7.1, 7.1$  Hz, 2H), 2.66 (s, 3H), 2.42 (s, 3H), 1.42 (t,  $J= 7.1, 7.1$  Hz, 3H). HRMS (EI),  $M+1$  calcd. for  $C_{12}H_{15}N_2O_2$ , 219.1155; found 219.1128. The same procedure was followed to get **2b** from **1b**.

General procedure for preparation of **3a** and **3b** from **2a** and **2b**:

The ethyl 2,7-dimethylimidazo[1,2-a]pyridine-3-carboxylate (**2a**) (6.4 g, 29.3 mmol) was dissolved in 64 mL of ethanol; 1M LiOH (60 mL, 60 mmol) was added and reaction was heated to reflux for 35 hours. The resulting solution was concentrated to dryness and then made acidic (pH~4-5) with the addition of 4 N HCl; the precipitated compound was collected by filtration and dried to give 4.1 grams (79%) of 2,7-dimethylimidazo[1,2-a]pyridine-3-carboxylic acid (**3a**), an off-white solid. M.P. 181-183°C;  $^1H$  NMR (300 MHz,  $CD_3OD$ )  $\delta$  9.52 (d,  $J= 7.1$  Hz, 1H), 7.73 (d,  $J= 1.8, 0.9, 0.9$  Hz, 1H), 7.48 (dd,  $J= 7.1, 1.3$  Hz, 1H), 2.81 (s, 3H), 2.63 (s, 3H). HRMS (EI),  $M+1$  calcd. for  $C_{10}H_{11}N_2O_2$ , 191.0815; found 191.0837. Retention time = 0.6-0.7 minutes (mobile phase: 60% water: acetonitrile). A similar procedure followed to get **3b** from **2b**.

General procedure for preparation of **4a** and **4b** from **3a** and **3b**:

EDC.HCl (1.20 Equiv) and *N, N*- diisopropylethylamine (2.5 equiv.) were added to a solution of *N*-Boc piperazine (1 equiv.), acid compound (**3a** or **3b**) (1 equiv.) and HOBt (1.2 equiv.) in DMF (8V) and stirred for 24 hours at room temperature under nitrogen. Ethyl acetate was added to the crude reaction mixture and washed with a 10% bicarbonate solution. The organic layer was dried over anhydrous sodium sulfate ( $Na_2SO_4$ ) and then concentrated under reduced pressure. The crude material was purified by column by using 40 % Ethyl acetate in hexane as eluents. The gummy solid of (tert-butyl 4-(2-methylimidazo[1,2-a]pyridine-3-carbonyl)piperazine-1-carboxylate) **4a**.  $^1H$  NMR (300 MHz,  $CD_3OD$ )  $\delta$  9.50 (d,  $J= 7.1$  Hz, 1H), 7.75 (d,  $J= 1.8, 0.9, 0.9$  Hz, 1H), 7.46 (dd,  $J= 7.1, 1.3$  Hz, 1H), 2.79 (s, 3H), 2.6 (s, 3H), 1.40 (s, 9H). HRMS (EI),  $M+1$  calcd.  $C_{18}H_{24}N_4O_3$ , 345.190; found 345.097. The yield of **4a** and **4b**: 72% and 65% respectively.

General procedure for preparation of **5a** and **5b** from **4a** and **4b**:

The **Boc-compound (4a or 4b)** (1g) was dissolved in dichloromethane and treated with **4M** HCl-dioxane (2 mL) for 4h. The solvent was distilled under reduced pressure. The solid compound was collected through Buchner filtration to give ((2-methylimidazo[1,2-a]pyridin-3-yl)(piperazin-1-yl)methanone hydrochloride) **5a** <sup>1</sup>H NMR (300 MHz, CD<sub>3</sub>OD) δ 9.50 (d, *J*= 7.1 Hz, 1H), 7.75 (d, *J*= 1.8, 0.9, 0.9 Hz, 1H), 7.46 (dd, *J*= 7.1, 1.3 Hz, 1H), 3.45 (s, 1H), 2.79 (s, 3H), 2.6 (s, 3H). HRMS (EI), M+1 calcd. C<sub>13</sub>H<sub>17</sub>ClN<sub>4</sub>O, 281.11; found 281.25. Same procedure for the **5b** and obtained 64 to 72% yield.

General procedure for preparation of **6a** and **6b** from **5a** and **5b**

**5a/5b** was dissolved in DMF and then K<sub>2</sub>CO<sub>3</sub> and propargyl bromide (80% in toluene) (1.5 eq) was added. The reaction mixture was heated to 100 °C for 12h. Once the reaction complete, ethyl acetate was added to the reaction mixture and washed with water. The organic layer was dried over anhydrous sodium sulfate and then concentrated under reduced pressure. The crude material was purified by column by using 60 % Ethyl acetate in hexane as eluents to yield 70%. <sup>1</sup>H NMR (300 MHz, CD<sub>3</sub>OD) δ 9.50 (d, *J*= 7.1 Hz, 1H), 7.75 (d, *J*= 1.8, 0.9, 0.9 Hz, 1H), 7.46 (dd, *J*= 7.1, 1.3 Hz, 1H), 3.15 (s, 1H), 3.46(s, 2H), 2.79 (s, 3H), 2.6 (s, 3H). HRMS (EI), M+1 calcd. C<sub>16</sub>H<sub>18</sub>N<sub>4</sub>O, 283.15; found 283.35

General procedure for preparation of **7a-j** and **8a-p** from **6a** and **6b**:

A solution of the alkyne (**6a/6b**) (1.0 equiv.) in DMF: H<sub>2</sub>O (8:2) was reacted with different substituted azides (1.5 equiv.) in the presence of sodium ascorbate (0.01 equiv.) and CuSO<sub>4</sub>·5H<sub>2</sub>O (0.02 equiv.). The reaction mixture was stirred at rt for 7-12 h. The reaction mixture was monitored by TLC. Once completion of the reaction, as indicated by TLC, the reaction was diluted with ethyl acetate and washed with water. The organic layer was dried over anhydrous sodium sulfate, concentrated under reduced pressure and the crude residue was purified by column chromatography by using 70-90% ethyl acetate in hexane as eluent to get title compounds **7a-j** and **8a-p**.

General procedure for preparation of **9a** and **9b** from **5a** and **5b**:

**5a/5b** was dissolved in DMF and then  $K_2CO_3$  and 2-azidoethyl 4-methylbenzenesulfonate (1.5 eq) were added. The reaction mixture was heated to 100 °C for 12h. Once the reaction is complete, as indicated by TLC, ethyl acetate was added to the reaction mixture and washed with water. The organic layer was dried over anhydrous sodium sulfate and then concentrated under reduced pressure. The crude material was purified by column chromatography, using 60 % Ethyl acetate in hexane as eluents to yield **9a** as a gummy solid ((4-(2-azidoethyl)piperazin-1-yl)(2-methylimidazo[1,2-a]pyridin-3-yl)methanone).  $^1H$  NMR (300 MHz,  $CD_3OD$ )  $\delta$  9.50 (d,  $J= 7.1$  Hz, 1H), 7.75 (d,  $J= 1.8, 0.9, 0.9$  Hz, 1H), 7.46 (dd,  $J= 7.1, 1.3$  Hz, 1H), 2.79 (s, 3H), 2.6 (s, 3H), 2.3 (t, 2H), 1.9 (t, 2H). HRMS (EI),  $M+1$  calcd.  $C_{15}H_{19}N_7O$ , 314.17; found 314.27. Same procedure for the compound **9b**.

General procedure for preparation of **10a-d** and **11a-e** from **9a** and **9b**:

A solution of azide **9a/9b** (1.0 equiv.) in DMF:  $H_2O$  (8:2) is reacted with various substituted acetylenes (1.5 equiv.) in the presence of sodium ascorbate (0.01 equiv.) and  $CuSO_4 \cdot 5H_2O$  (0.02 equiv.) The reaction mixture is stirred at rt for 7 to 12h. Once completion of the reaction, as indicated by TLC, the reaction was diluted with ethyl acetate and washed with water. The organic layer was dried over anhydrous sodium sulfate concentrated under reduced pressure and the crude residue was purified by column chromatography using 70-90% ethyl acetate in hexane as eluent to get title compounds **10a-d** and **11a-e**.

### ***3. Biological Procedures:***

#### **Cytotoxicity assay**

HeLa cell cytotoxicity studies were carried out as described previously. Briefly, the cells were cultured in DMEM supplemented with 10% fetal calf serum and 2 mM L-glutamine. Cells were plated at initial cell concentration of  $2 \times 10^4$  cells / well and incubated with the compounds for ~65 h prior to addition of Alamar Blue solution for further 5 h <sup>1</sup>.

#### ***In-vitro antileishmanial activity***

Anti-leishmanial activity of the titled analogues was determined by evaluating their inhibition activity against promastigote forms of *Leishmania major* LV9 strain. Compounds were screened against promastigote forms of the Leishmania strains to determine their effective concentration (EC<sub>50</sub>) values. Anti-leishmanial drug miltefosine was used as standard for comparison purpose. Anti-promastigote activity of these titled derivatives was determined by Alamar blue assay method. *L. major* promastigotes were cultured at 37°C in M199 medium supplemented with 10% heat-inactivated fetal calf serum<sup>2</sup>. Parasites were incubated with serial dilutions of compounds for 72 h, followed by Alamar blue based assay as previously described<sup>3</sup>.

#### ***In-vitro* antitrypanosomal activity**

The titled compounds were tested on bloodstream forms of *Trypanosoma brucei*, which was cultured in HMI-9 medium (pH 7.4) supplemented with 10% heat-inactivated Fetal Calf Serum (FCS, BioSera) and 14 µl/L of 13.4 M βmercaptoethanol (Sigma)<sup>4</sup>. In a flow cabinet through filtration medium was sterilized. The resultant *T. brucei* cultures were incubated at 37 °C and 5% CO<sub>2</sub> and passaged in vented flasks three times a week. The assays were performed by alamar blue assay method<sup>5</sup> in 96-well plates with 1 × 10<sup>5</sup> cell/ well in the presence of 23 doubling dilutions of test compound, and one well for each dilution series receiving growth medium only, for 48 h at 37 °C/5% CO<sub>2</sub>. The alamar blue solution was added for a further 24 h incubation before fluorescence was measured in a Biotex plate reader, λ<sub>ex</sub> 540 nm, λ<sub>em</sub> 590 nm. EC<sub>50</sub> values were calculated by non-linear regression to a sigmoidal curve with variable slope using Grafit software.

#### ***In-silico* prediction of ADME and Toxicity parameters**

The ADMET parameters of the titled compounds were *in silico* predicted using Qikprop module of Schrodinger. The diverse parameters predicted were molecular weight (M.Wt.), total solvent accessible surface area (SASA), number of hydrogen bond donor (HBD), number of hydrogen bond acceptor (HBA), octanol / water partition coefficient (log P), aqueous solubility (Log S), predicted apparent Caco-2 cell permeability in nm/sec (P Caco) and number of rotatable bonds (Rot)<sup>6,7</sup>. SMILES format of the

compounds was generated by using OSIRIS DataWarrior. All the related toxicity parameters were also predicted by the same software <sup>8</sup>.

#### ***4. Molecular docking study***

Molecular docking study was carried out using Schrodinger software <sup>9</sup> (Version 2019-1, Schrodinger) installed on Intel Xenon W 3565 processor and Ubuntu enterprise version 14.04 as an operating system. The selected target protein structure was retrieved from the RCSB protein data bank ([www.rcsb.org](http://www.rcsb.org)) <sup>10</sup>. Targeted ligands were drawn using ChemDraw 18.0 software.

#### **Ligand preparation**

The ligands used as an input for docking study was sketched using ChemDraw software and cleaned up the structures for bond alignment, ligands incorporated into the workstation, the energy was minimized using OPLS3e force field in Ligprep <sup>11</sup> (Version 2019-1, Schrodinger). This minimization helps to assign bond orders, the addition of hydrogens to the ligands, and conversion of 2D to 3D structure for further docking studies. The generated output file (best conformations of the ligands) was further used for docking studies.

#### **Protein preparation**

Protein was retrieved from the RCSB site (<https://www.rcsb.org/structure/2JK6>) <sup>12</sup>. Protein was prepared using a protein preparation wizard <sup>13</sup> (Version 2019-1, Schrodinger). Hydrogen atom was added to the proteins, and charges were assigned. Generated Het states using Epik at pH 7.0  $\pm$ 2.0. Pre-processed the protein and refined, modified the protein by analysing the workspace, water molecules, and other heteroatoms were examined, non-significant atoms were excluded from the crystal structure of the protein. Finally, the protein was minimized by using OPLS3e force field

#### **Receptor grid generation**

A receptor grid was generated around the protein by picking the inhibitory ligand (X-ray pose of the ligand in the protein). The centroid of the ligand was selected to create a grid box around it, and the Vander Waals radius of receptor atoms was scaled to 1.00 Å with a partial atomic charge of 0.25.

### **Docking validation**

The most straightforward way of validating the accuracy of specified parameters for docking study is to re-dock the co-crystallized ligand back into the binding site of the protein and calculate the root mean square deviation (RMSD) value between the crystallographic orientation and the docked pose. RMSD calculation is a convenient method to use in order to follow how much a structure has diverged from its initial geometry. The lower the RMSD value between the docked pose to that of its crystallographic orientation is an indication of the suitability of the docking protocols. Therefore, prior to screening of all ligands, the co-crystal structures of PDB-2JK6 (FAD molecule), was chosen and re-docked back into the same active site. The RMSD value between the crystallographic orientation and the best-docked pose was generated. The RMSD value of the selected targets was found to be 0.20 Å respectively. The lower RMSD value indicates that the docking protocol could be reliable for the final docking studies of the test compounds against the selected target.

### **Docking and analysis**

Molecular docking was performed using the above-prepared ligand and protein as input. The results of the docking study were analysed with the help of XP Visualiser (Version 2019-1, Schrodinger). Docking studies of the designed and synthesized molecules were performed by using the Glide module <sup>14</sup> in Schrodinger. All docking calculations were performed using Extra Precision (XP) mode. A scaling factor of 0.8 and a partial atomic charge of less than 0.15 was applied to the atoms of the protein. Glide docking score was used to determine the best-docked confirmation from the output. The interactions of these docked conformations were investigated further using XP visualizer.

## ***5. X-ray crystallographic studies:***



***Single crystal X-ray crystallographic structure of compound 8f:***

The suitable crystals of compound **8f** for single crystal X-ray diffraction (SCXRD) study were grown from the mixture of methanol and dichloromethane (1:3). The SCXRD measurements were performed on the Rigaku XtaLAB P200 diffractometer using graphite monochromated Mo-K $\alpha$  radiation ( $\lambda = 0.71073 \text{ \AA}$ ). The data was collected and reduced using CrysAlisPro (Rigaku Oxford Diffraction) software. The data collection was carried out at 100 K and the structures were solved using Olex2 with the ShelX structure solution program using Direct Methods and refined with the ShelXL refinement package using Least Squares minimization. The basic crystallographic data is shown in **Table 1**.

**Table 1. Single crystal data of compound 8f**

|                                    |                                                                    |
|------------------------------------|--------------------------------------------------------------------|
| Empirical formula                  | C <sub>23</sub> H <sub>23</sub> BrCl <sub>3</sub> N <sub>7</sub> O |
| Formula weight                     | 599.75                                                             |
| Temperature/K                      | 100.0                                                              |
| Crystal system                     | orthorhombic                                                       |
| Space group                        | Pbca                                                               |
| a/ $\text{\AA}$                    | 17.2953(7)                                                         |
| b/ $\text{\AA}$                    | 13.8502(5)                                                         |
| c/ $\text{\AA}$                    | 20.9305(7)                                                         |
| $\alpha/^\circ$                    | 90                                                                 |
| $\beta/^\circ$                     | 90                                                                 |
| $\gamma/^\circ$                    | 90                                                                 |
| Volume/ $\text{\AA}^3$             | 5013.8(3)                                                          |
| Z                                  | 8                                                                  |
| $\rho_{\text{calc}}/\text{g/cm}^3$ | 1.5889                                                             |
| $\mu/\text{mm}^{-1}$               | 1.992                                                              |
| F(000)                             | 2434.0                                                             |

---

|                                             |                                                               |
|---------------------------------------------|---------------------------------------------------------------|
| Crystal size/mm <sup>3</sup>                | 0.3 × 0.2 × 0.2                                               |
| Radiation                                   | Mo K $\alpha$ ( $\lambda$ = 0.71073)                          |
| 2 $\Theta$ range for data collection/°      | 6.62 to 59.64                                                 |
| Index ranges                                | -23 ≤ h ≤ 22, -18 ≤ k ≤ 19, -28 ≤ l ≤ 22                      |
| Reflections collected                       | 37545                                                         |
| Independent reflections                     | 6649 [R <sub>int</sub> = 0.0292, R <sub>sigma</sub> = 0.0204] |
| Data/restraints/parameters                  | 6649/2/344                                                    |
| Goodness-of-fit on F <sup>2</sup>           | 1.039                                                         |
| Final R indexes [I ≥ 2 $\sigma$ (I)]        | R <sub>1</sub> = 0.0292, wR <sub>2</sub> = 0.0725             |
| Final R indexes [all data]                  | R <sub>1</sub> = 0.0411, wR <sub>2</sub> = 0.0791             |
| Largest diff. peak/hole / e Å <sup>-3</sup> | 1.19/-0.60                                                    |

---

6.  $^1\text{H}$  NMR spectras of intermediate compounds and final compounds:

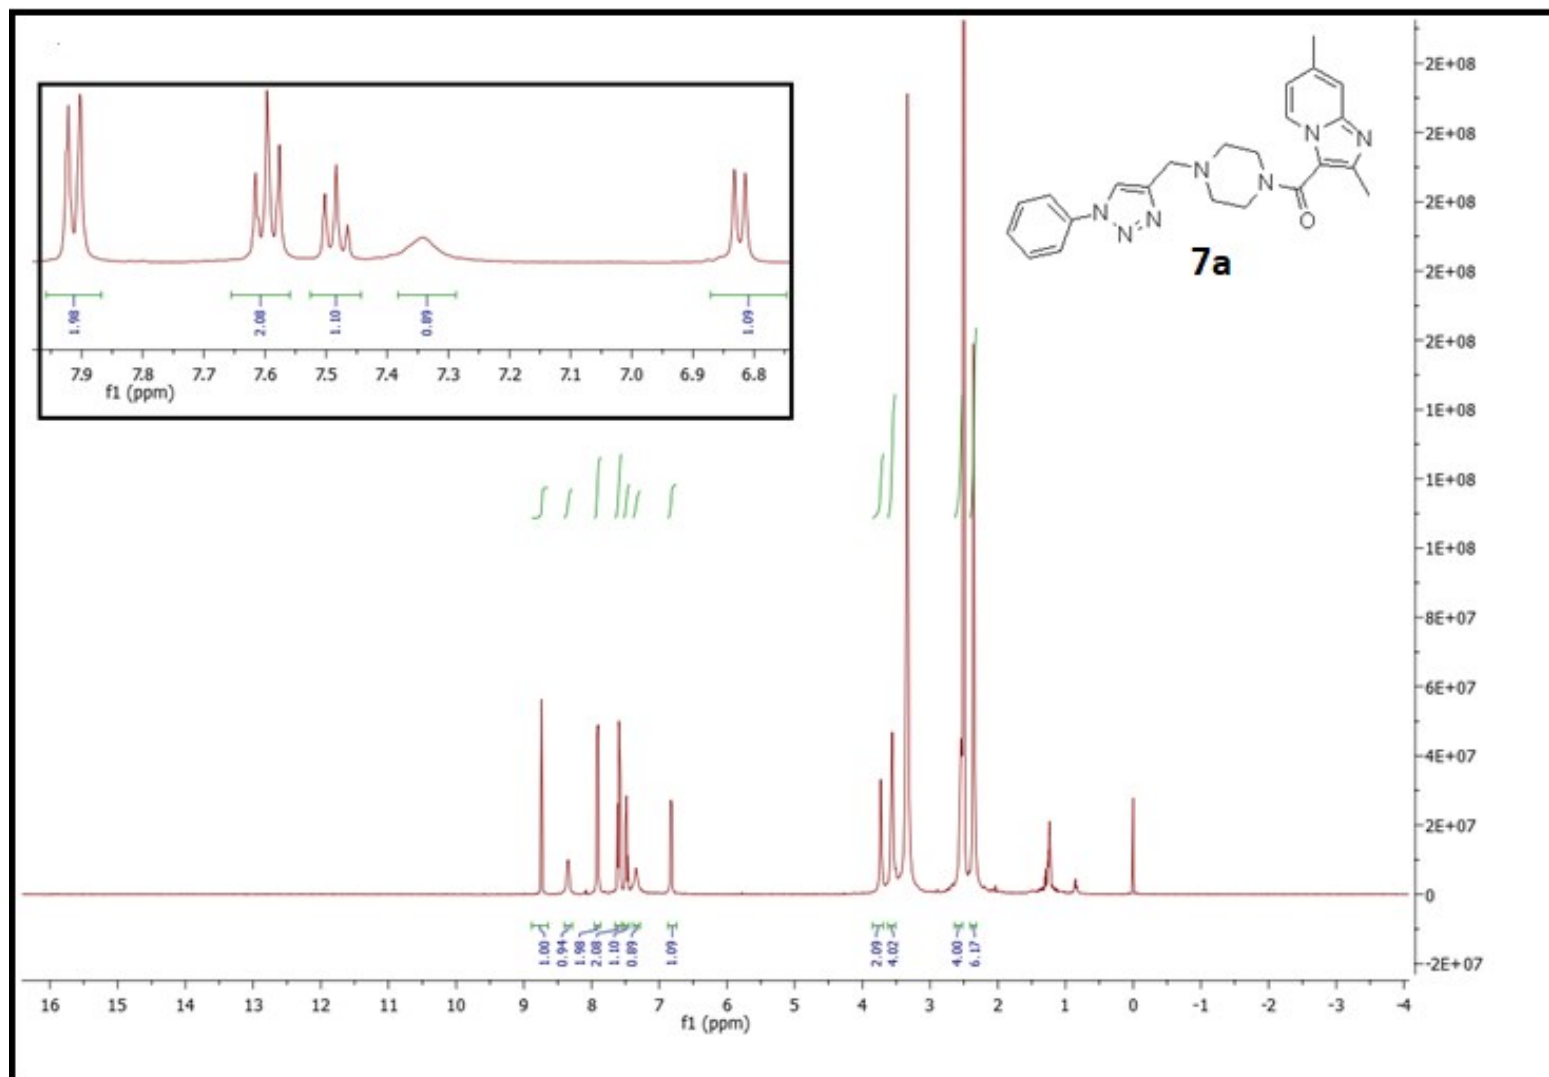

$^1\text{H}$ NMR of **7a**

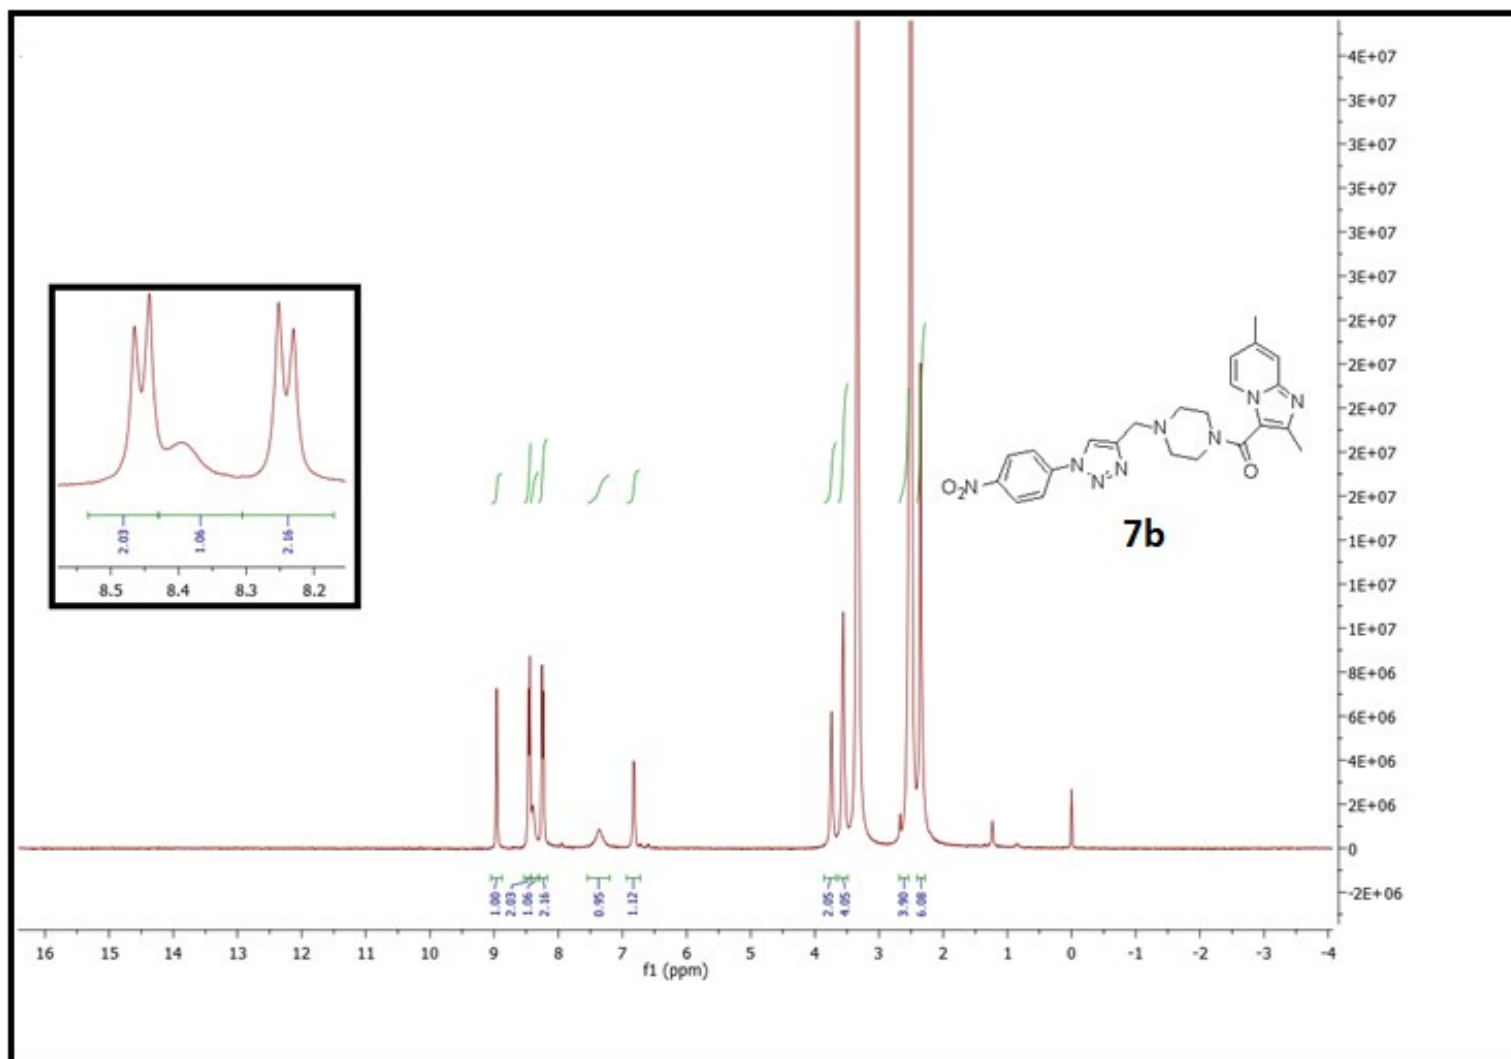

$^1\text{H NMR}$  of **7b**

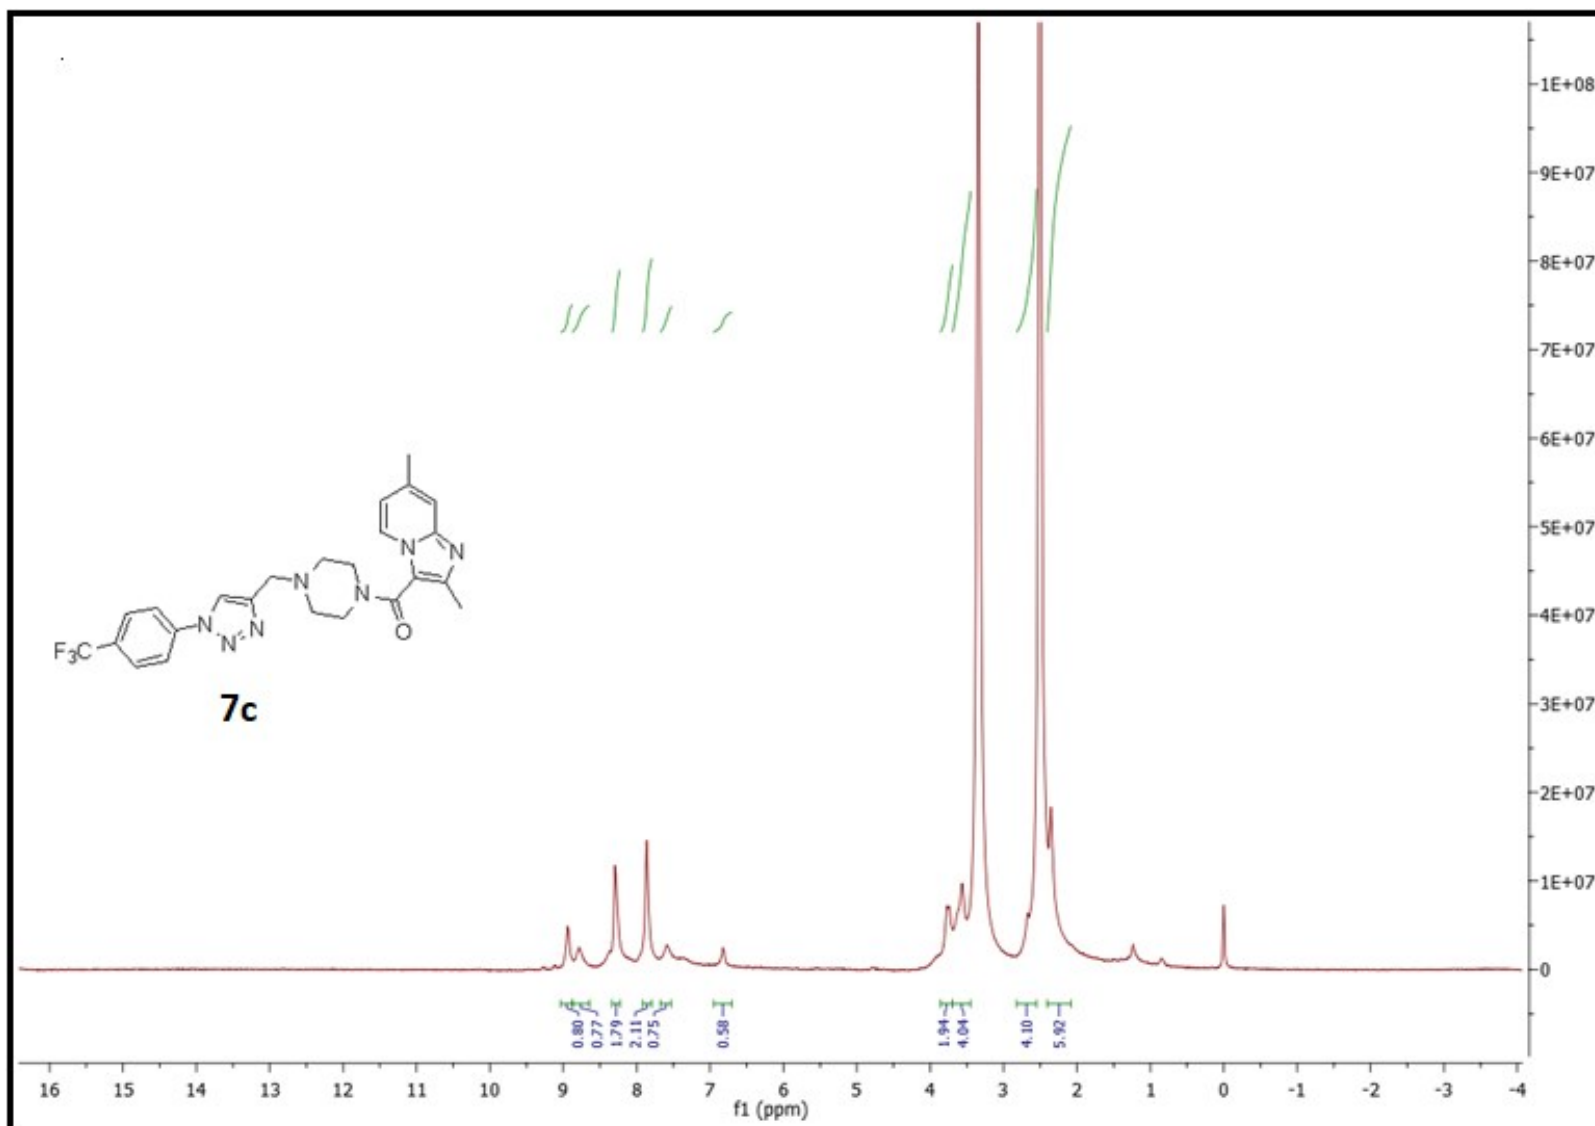

**<sup>1</sup>H NMR of 7c**

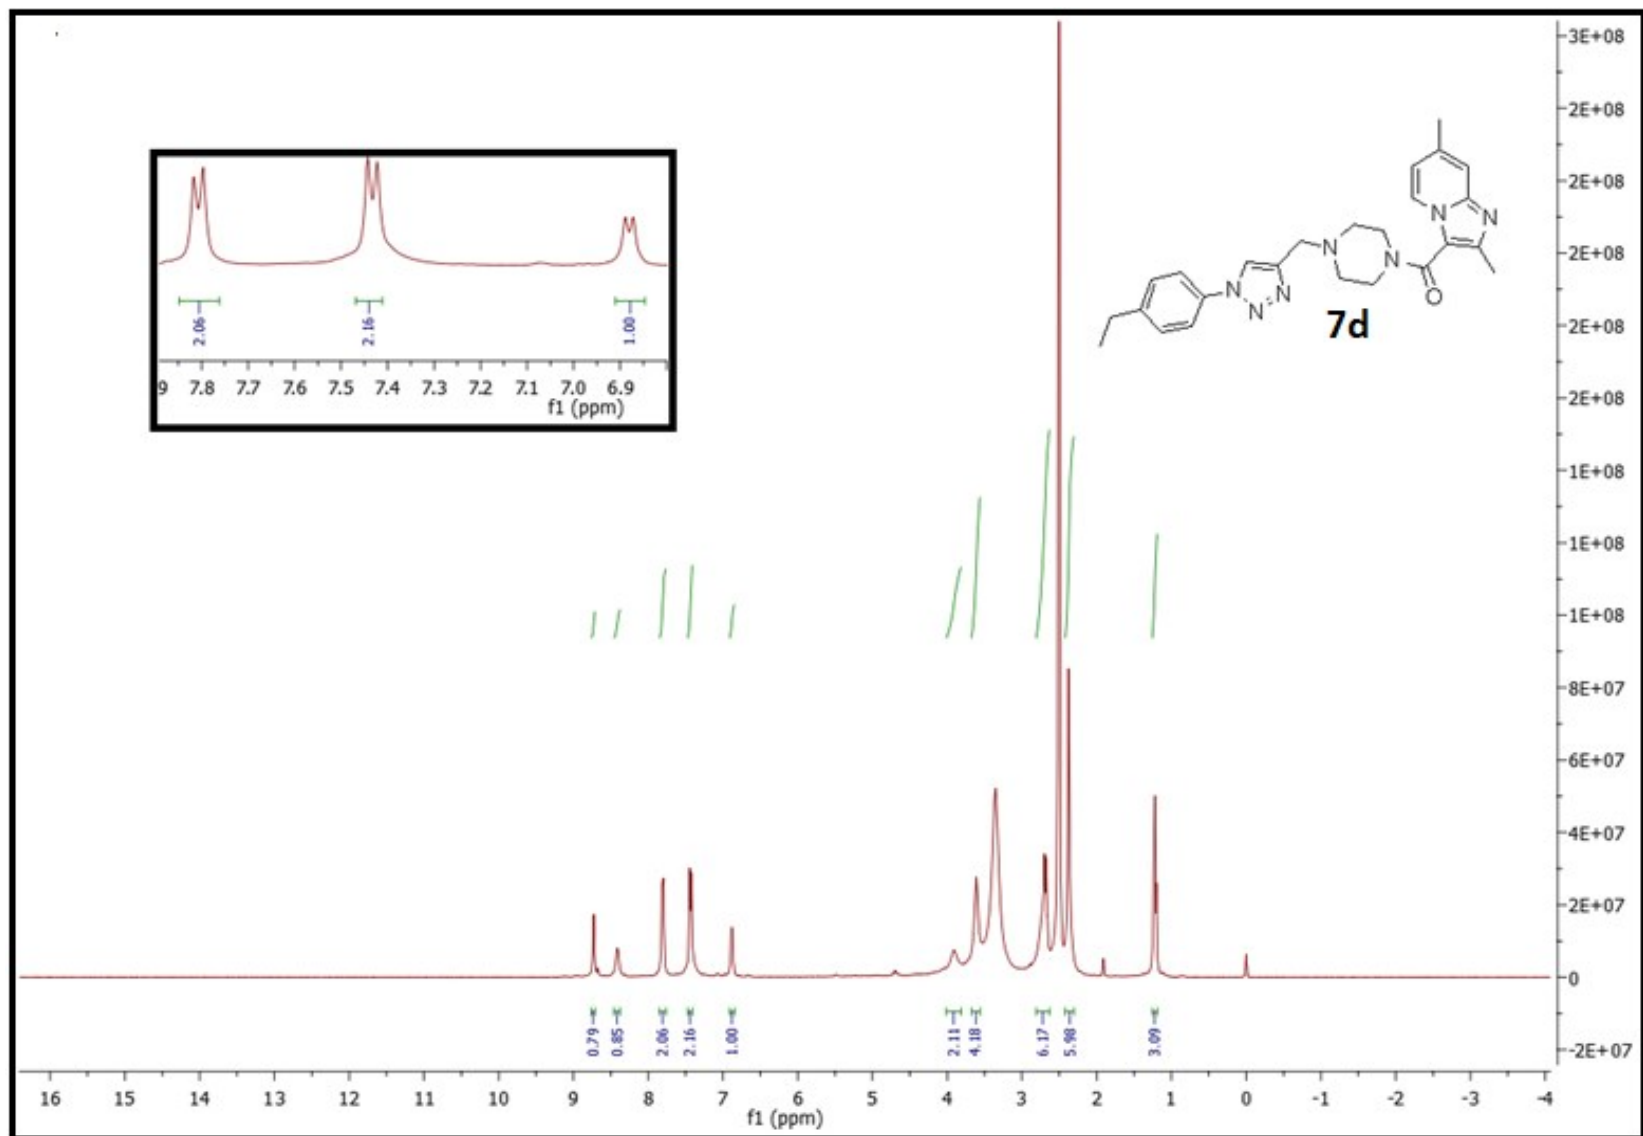

<sup>1</sup>H NMR of 7d

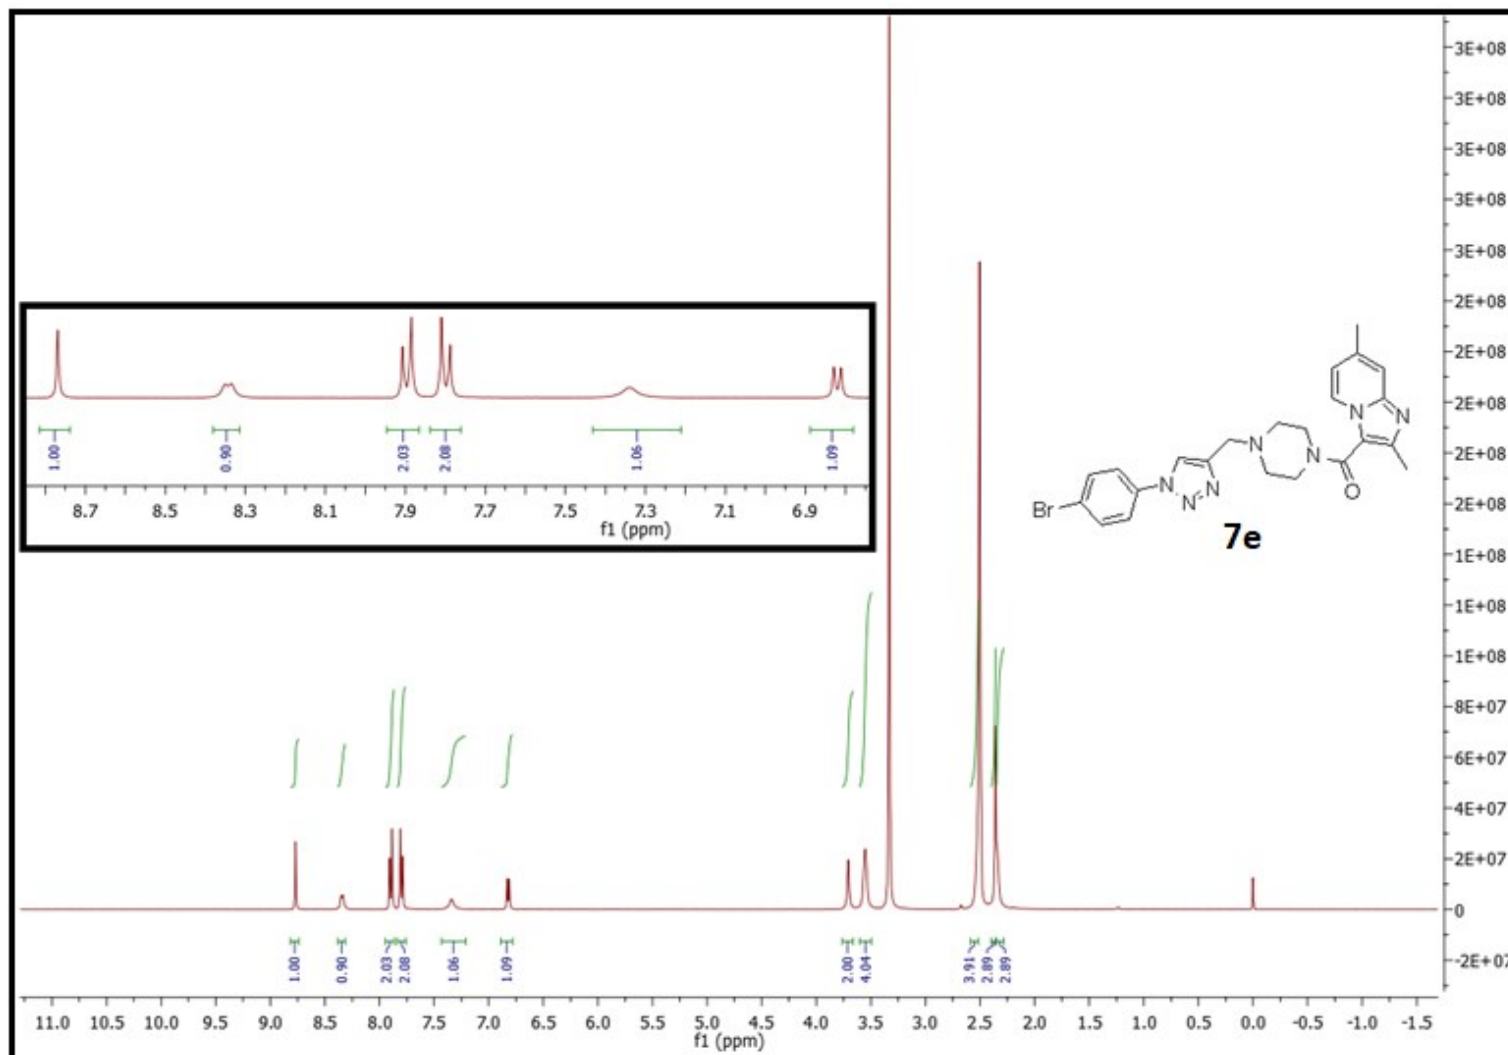

$^1\text{H}$ NMR of **7e**

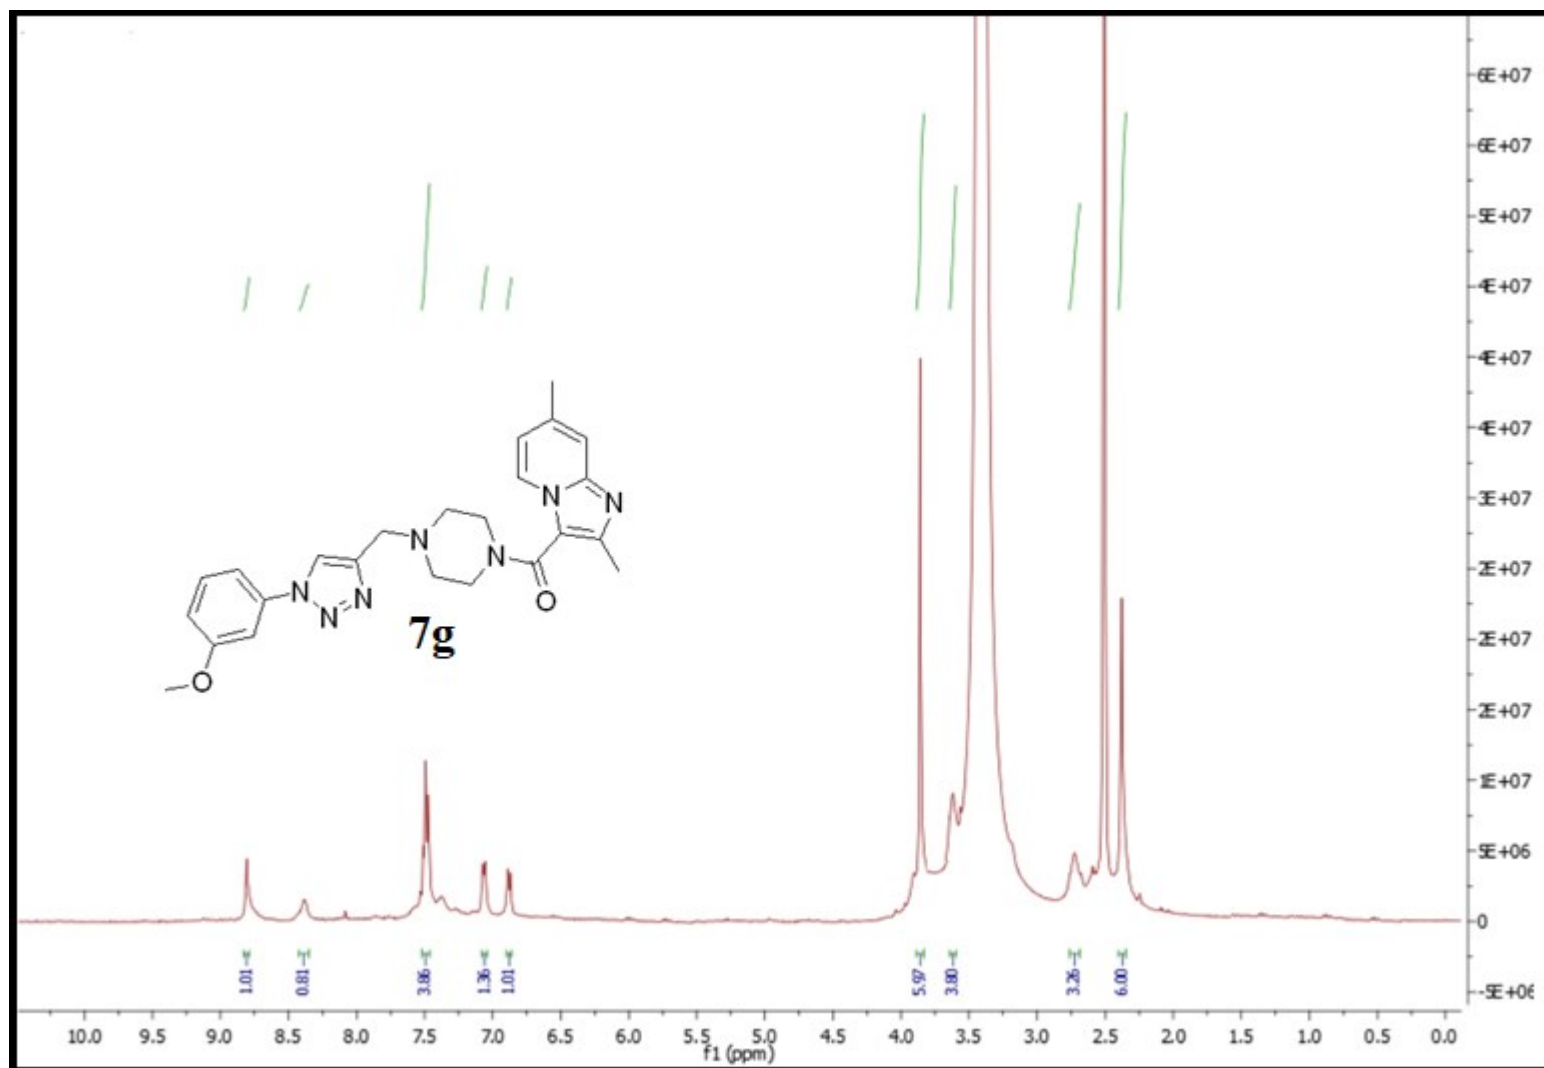

**<sup>1</sup>H NMR of 7g**



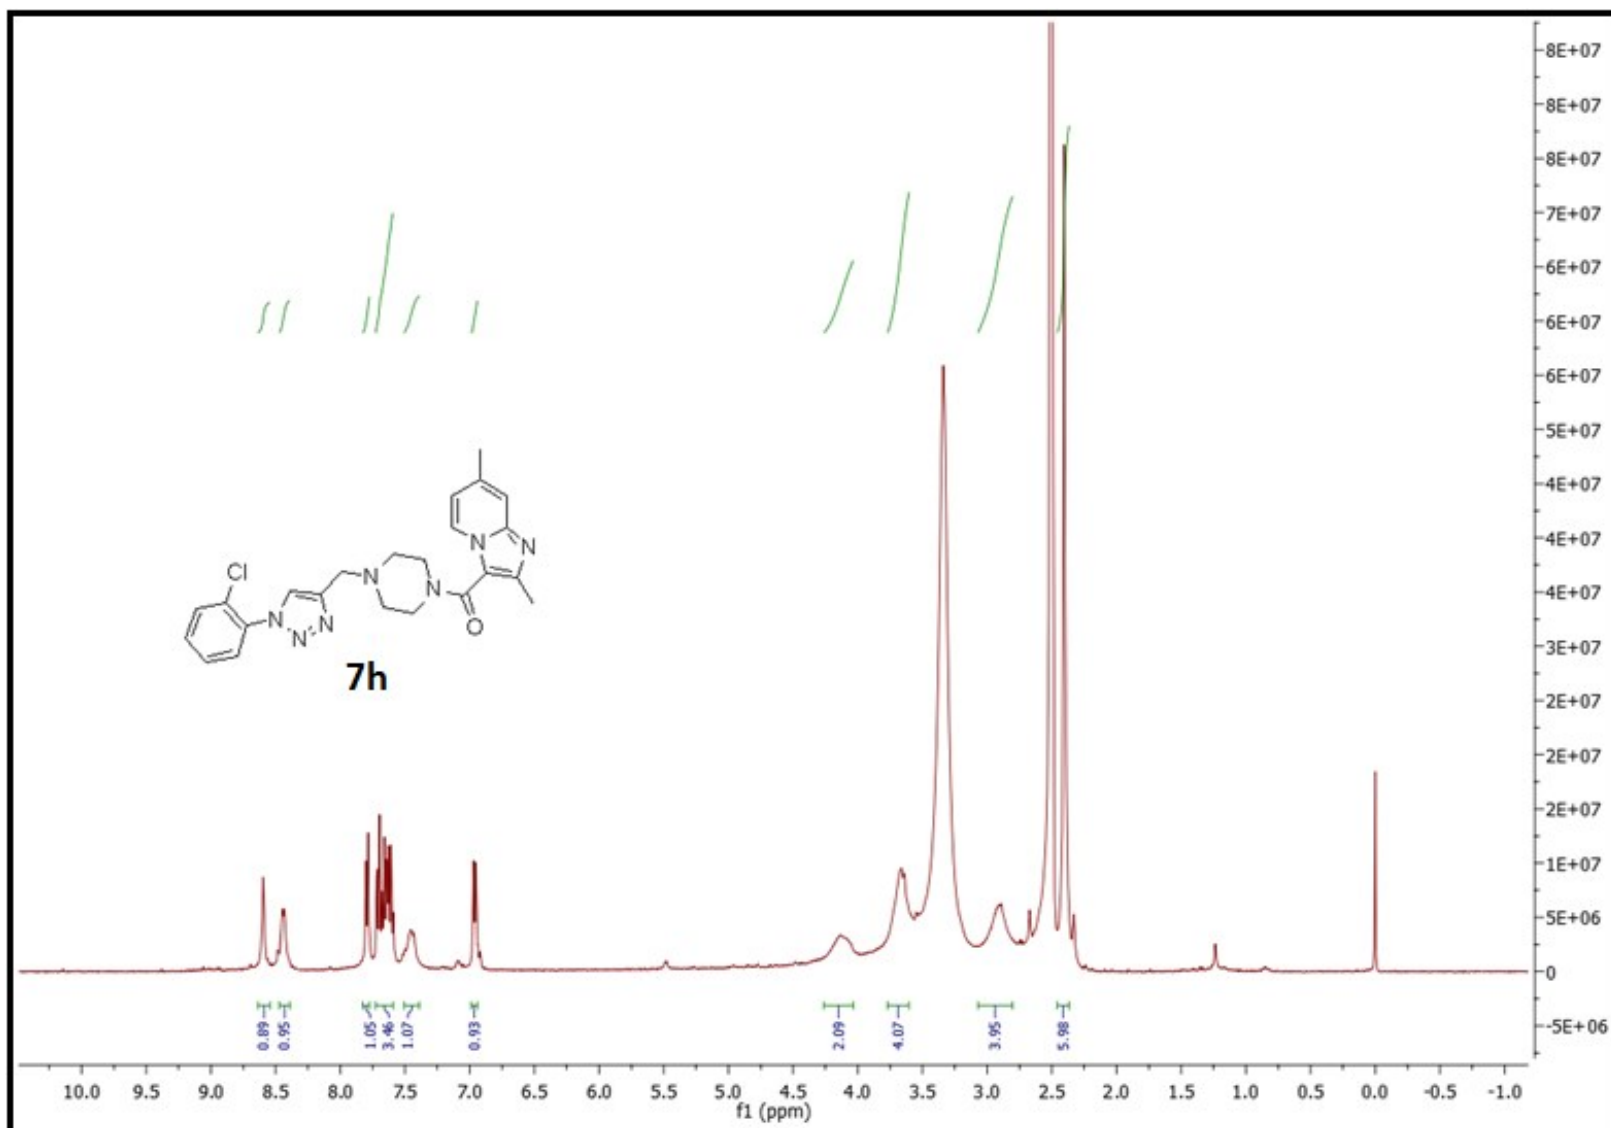

<sup>1</sup>H NMR of 7h

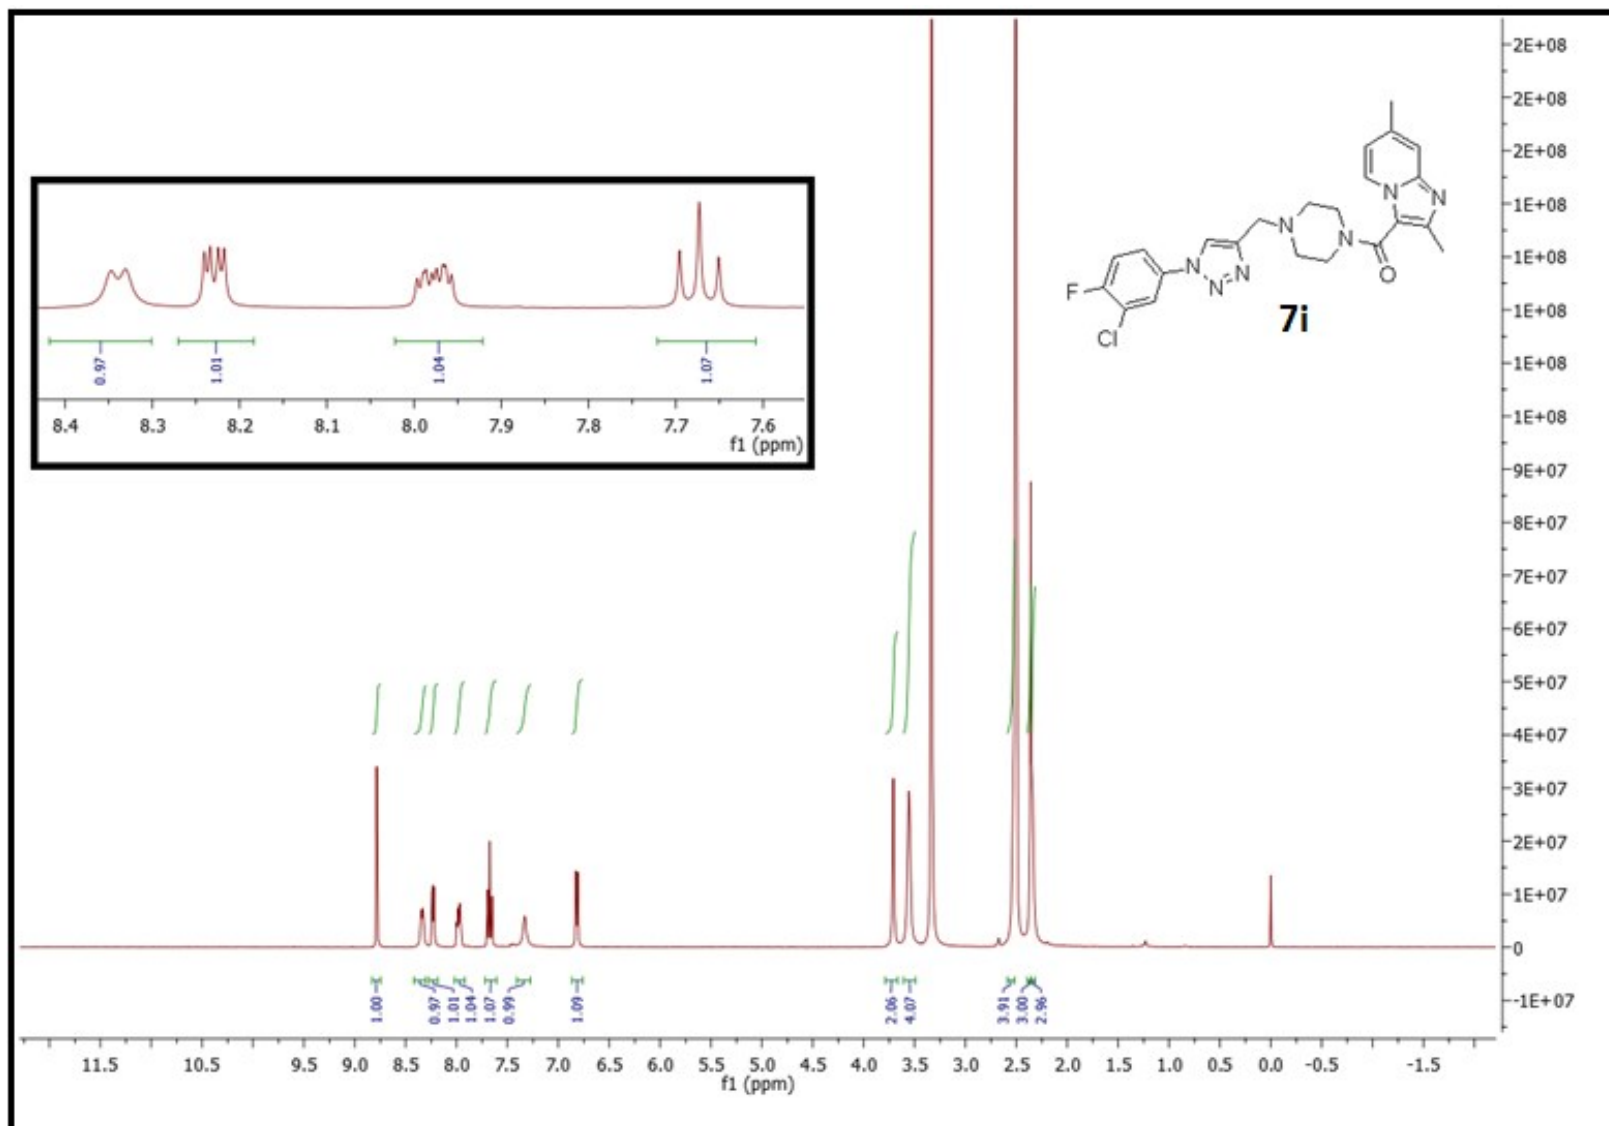

<sup>1</sup>H NMR of **7i**

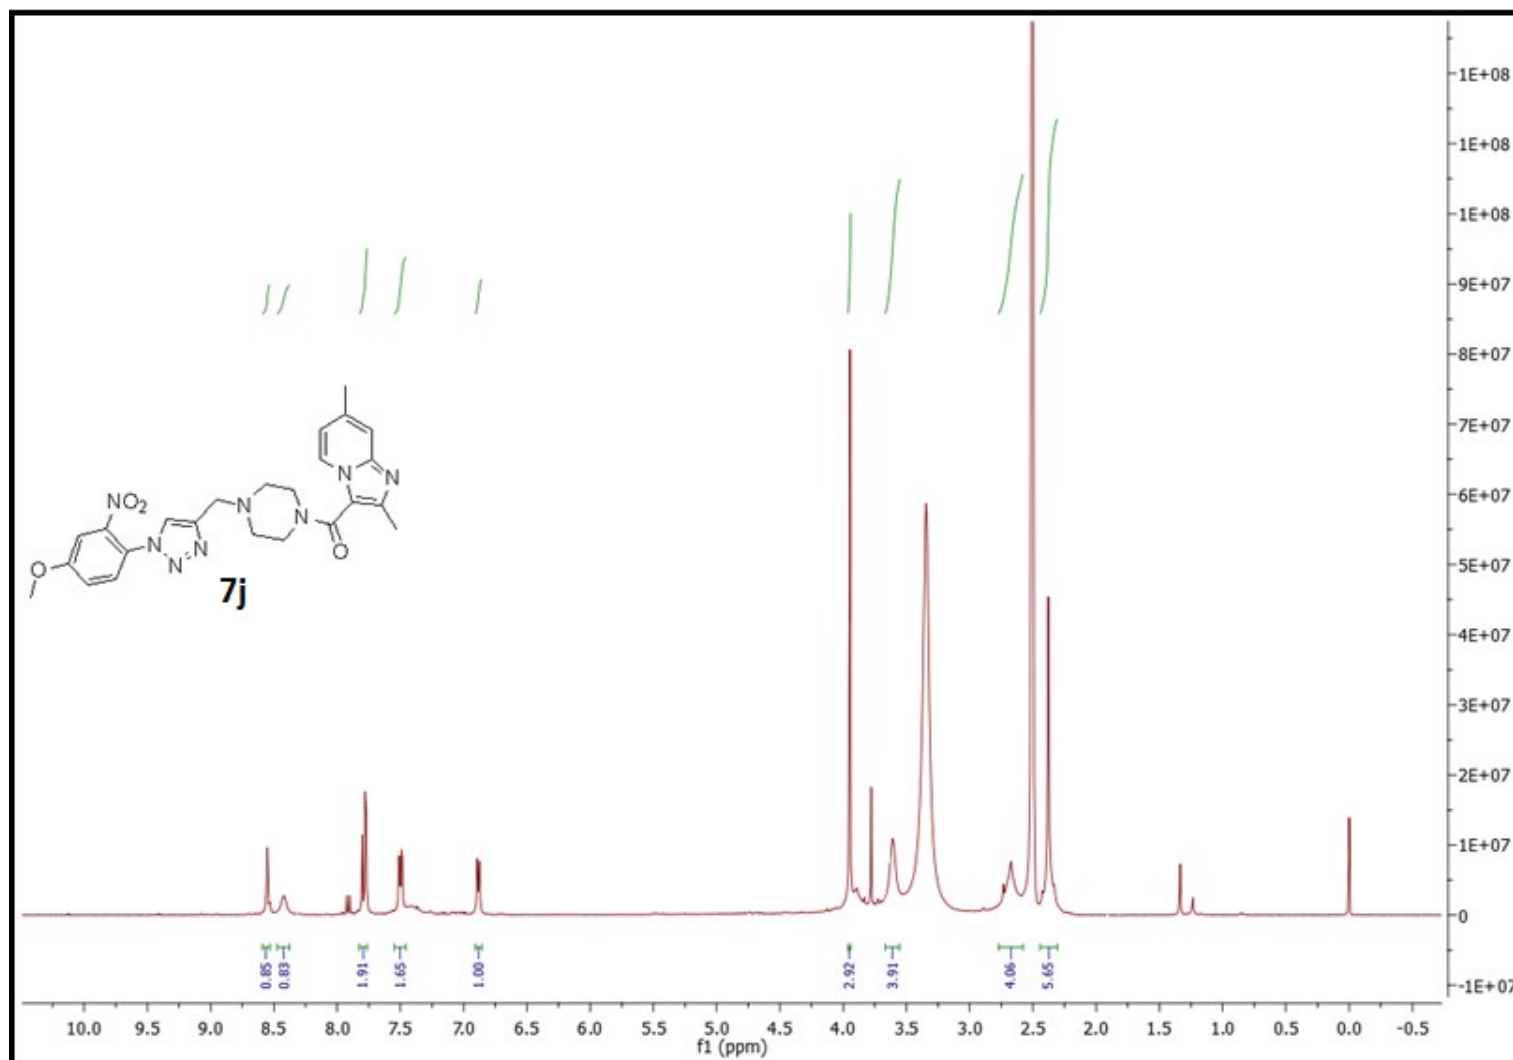

$^1\text{H NMR}$  of **7j**

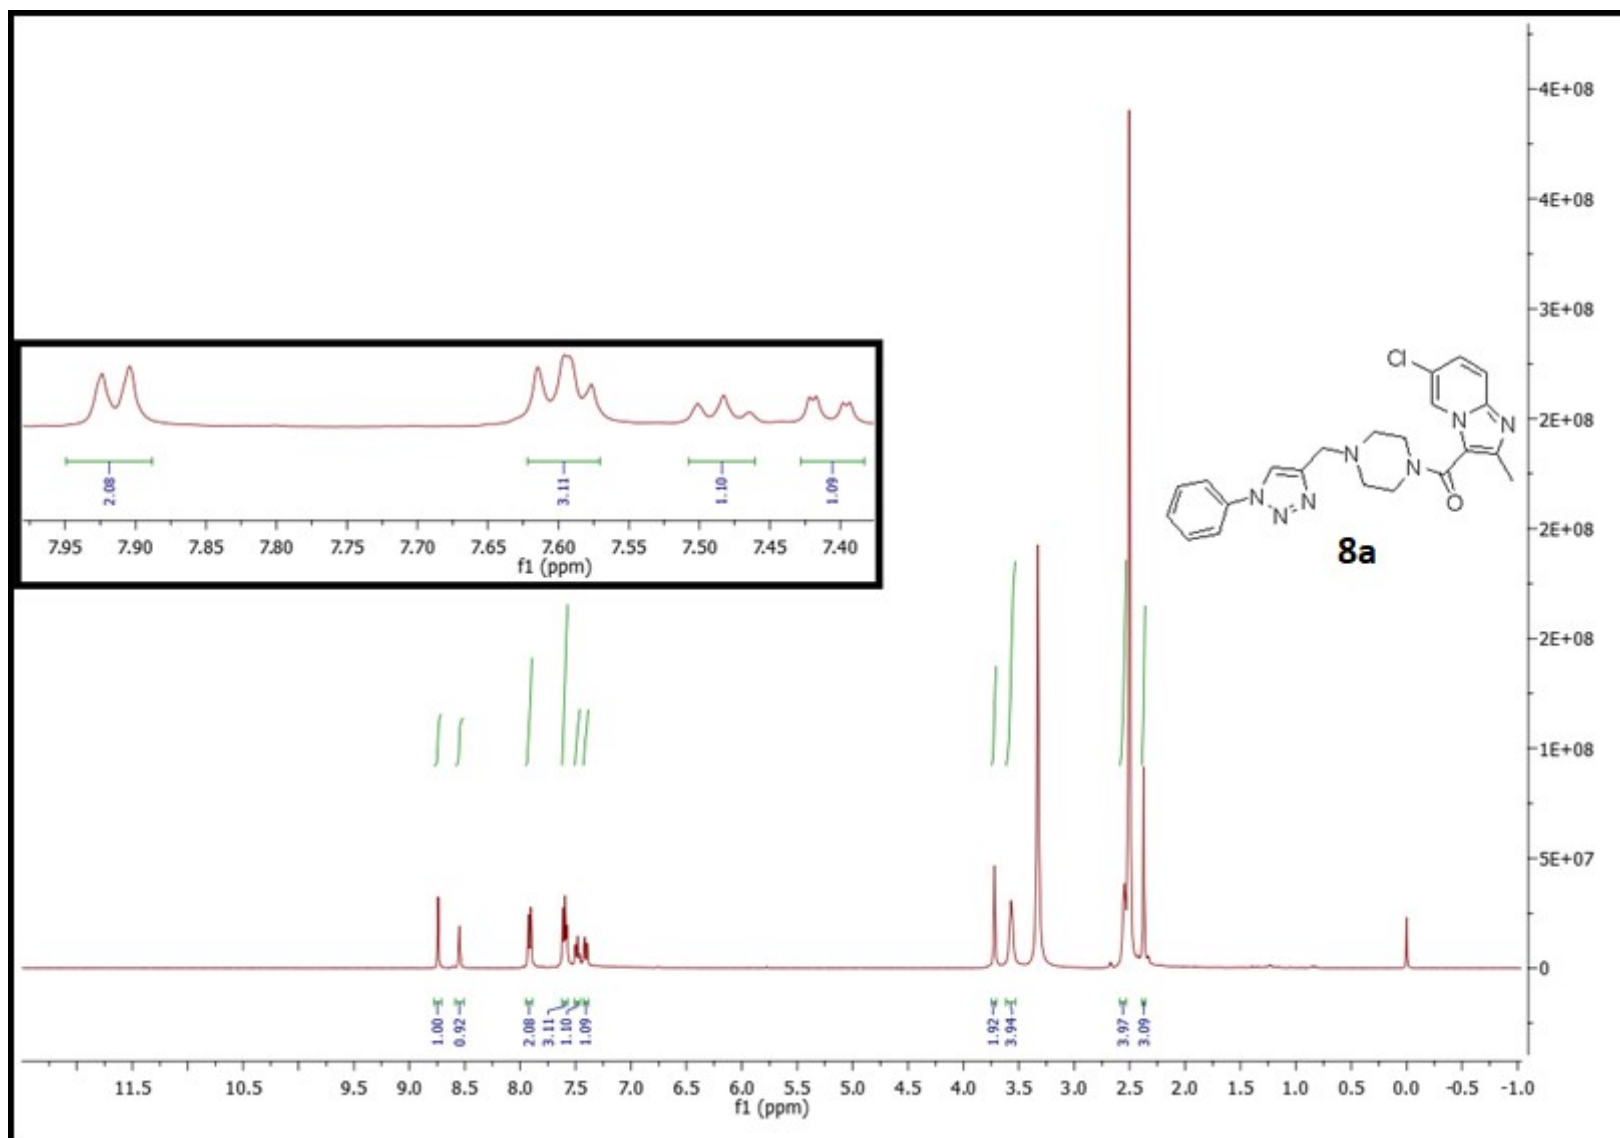

<sup>1</sup>H NMR of 8a

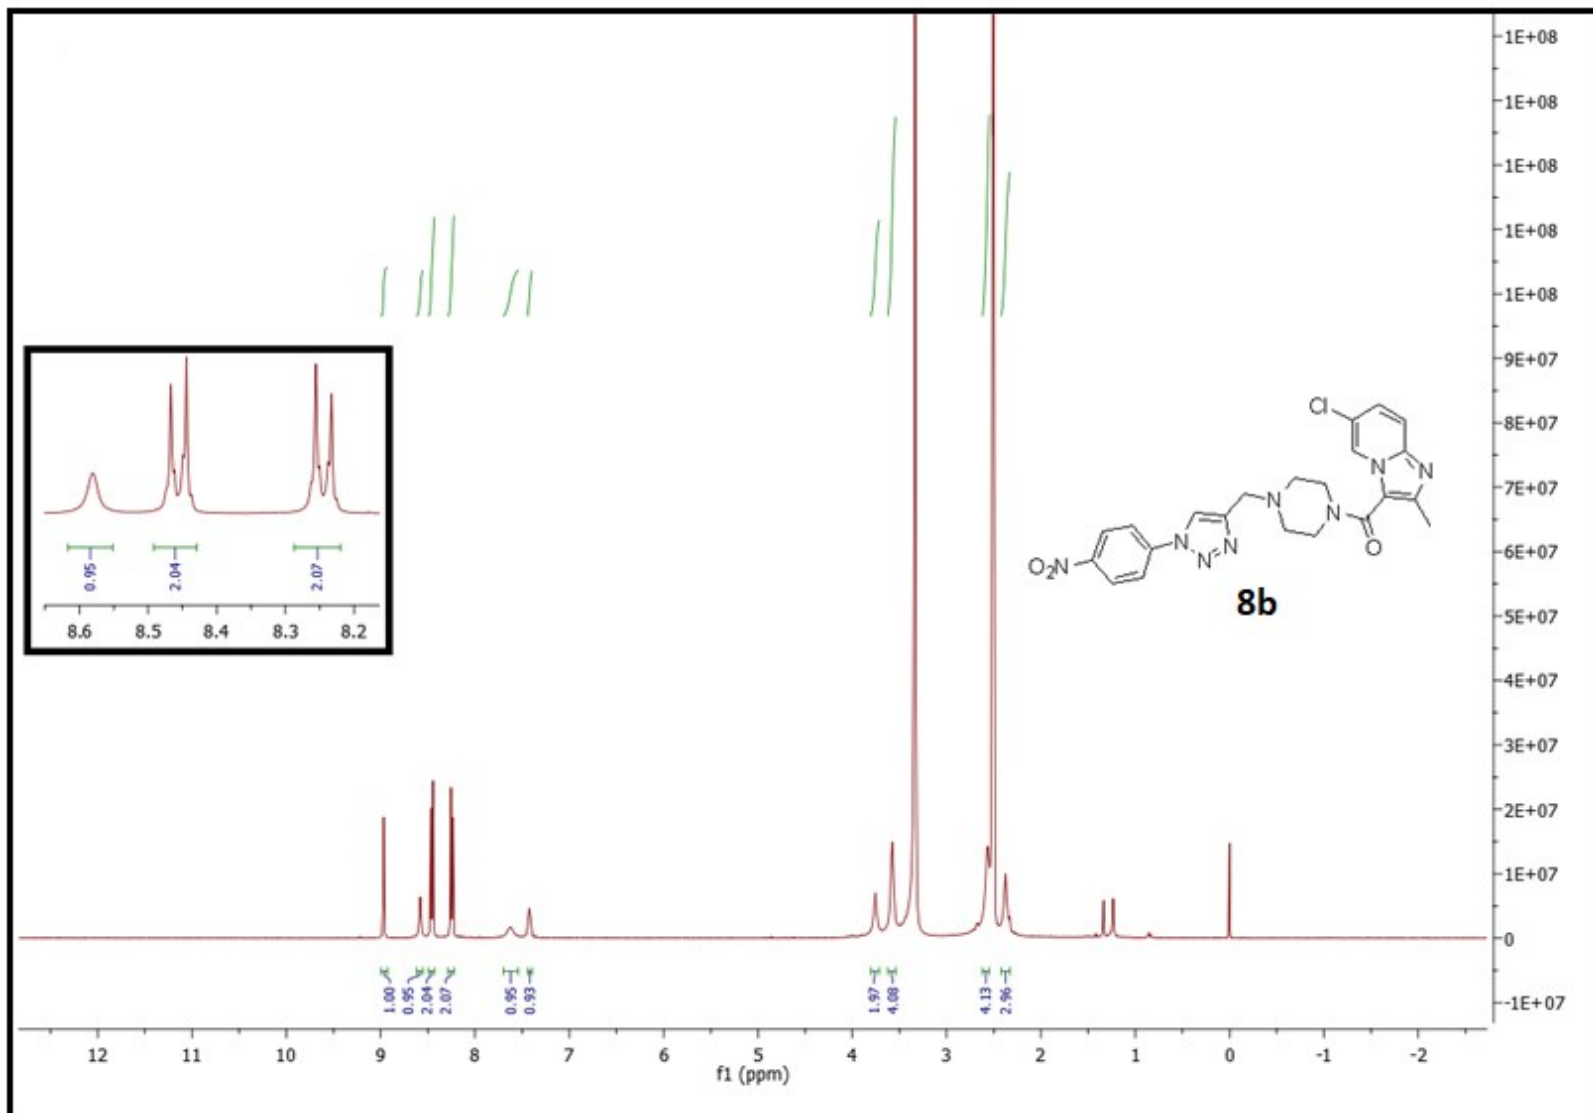

<sup>1</sup>H NMR of **8b**

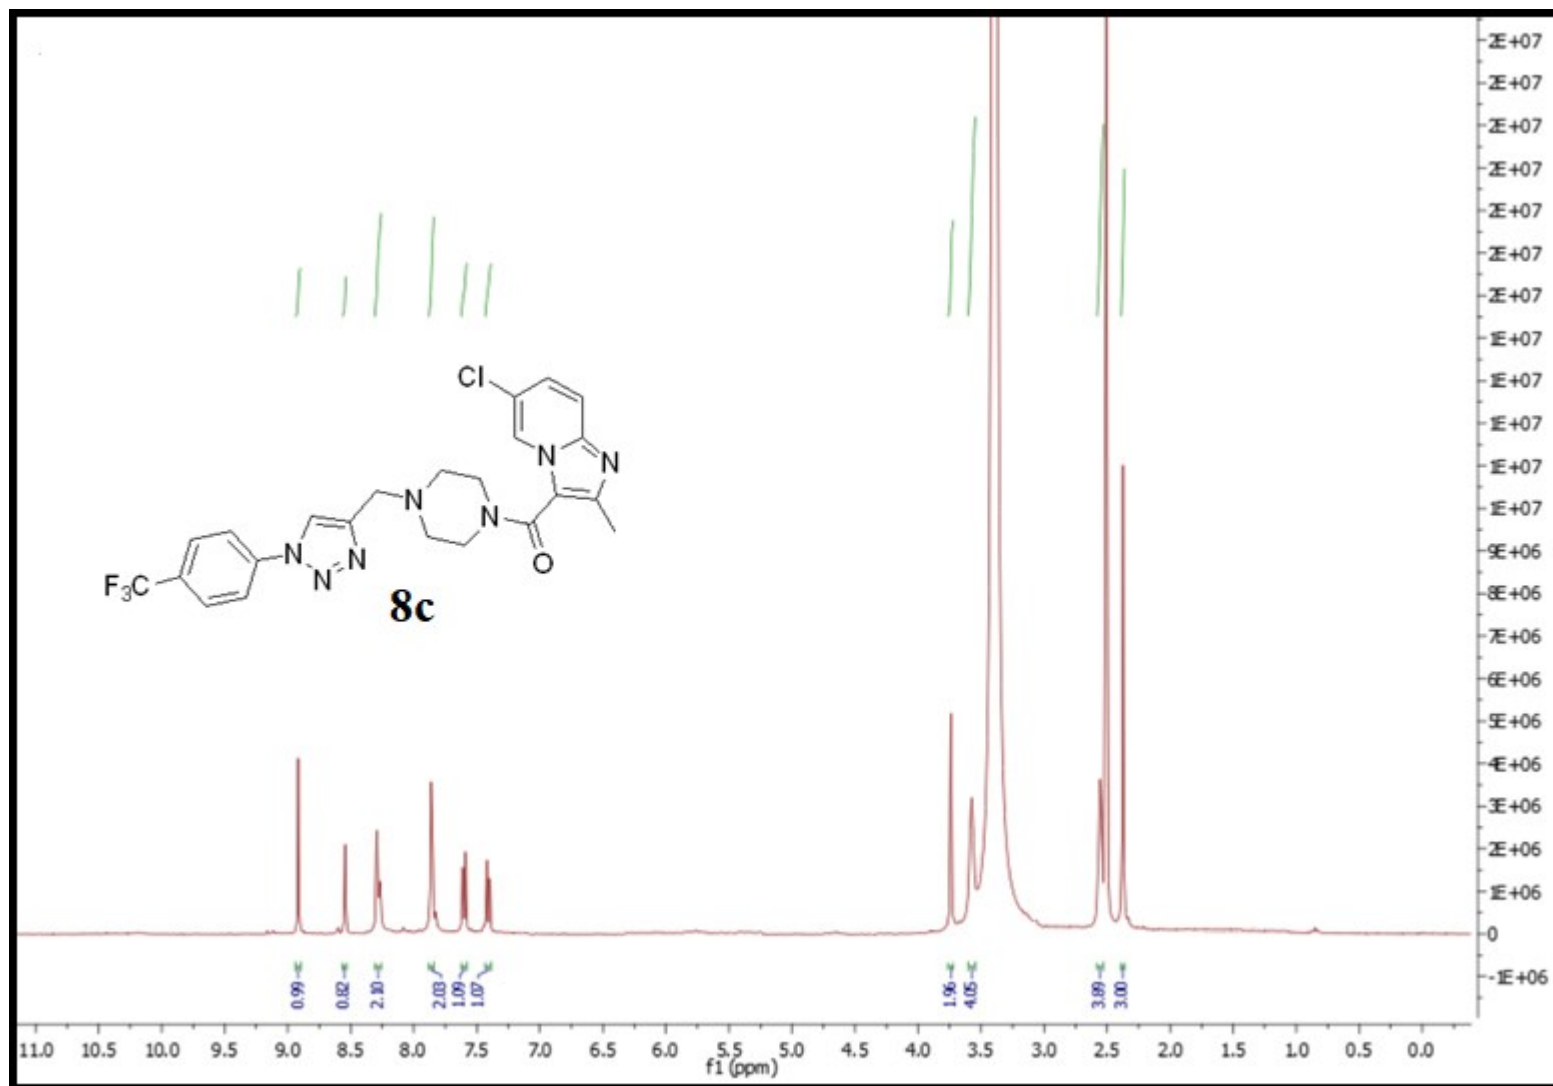

$^1\text{H NMR}$  of **8c**

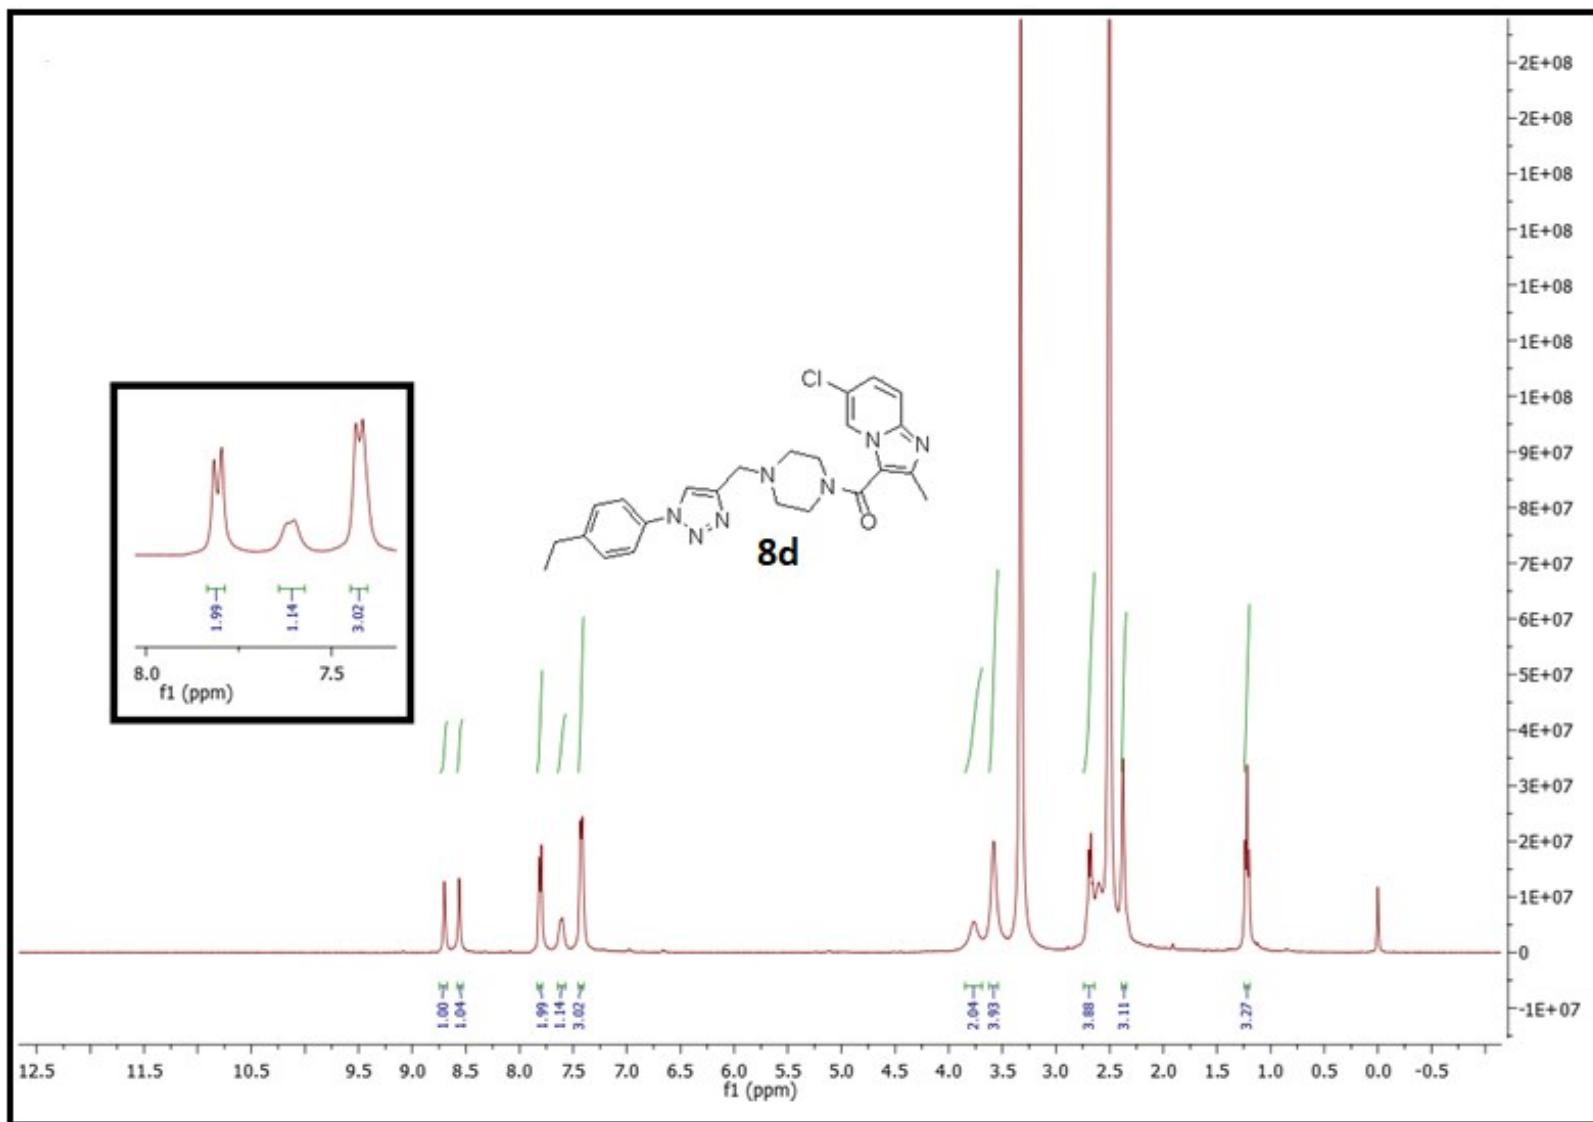

$^1\text{H}$ NMR of **8d**

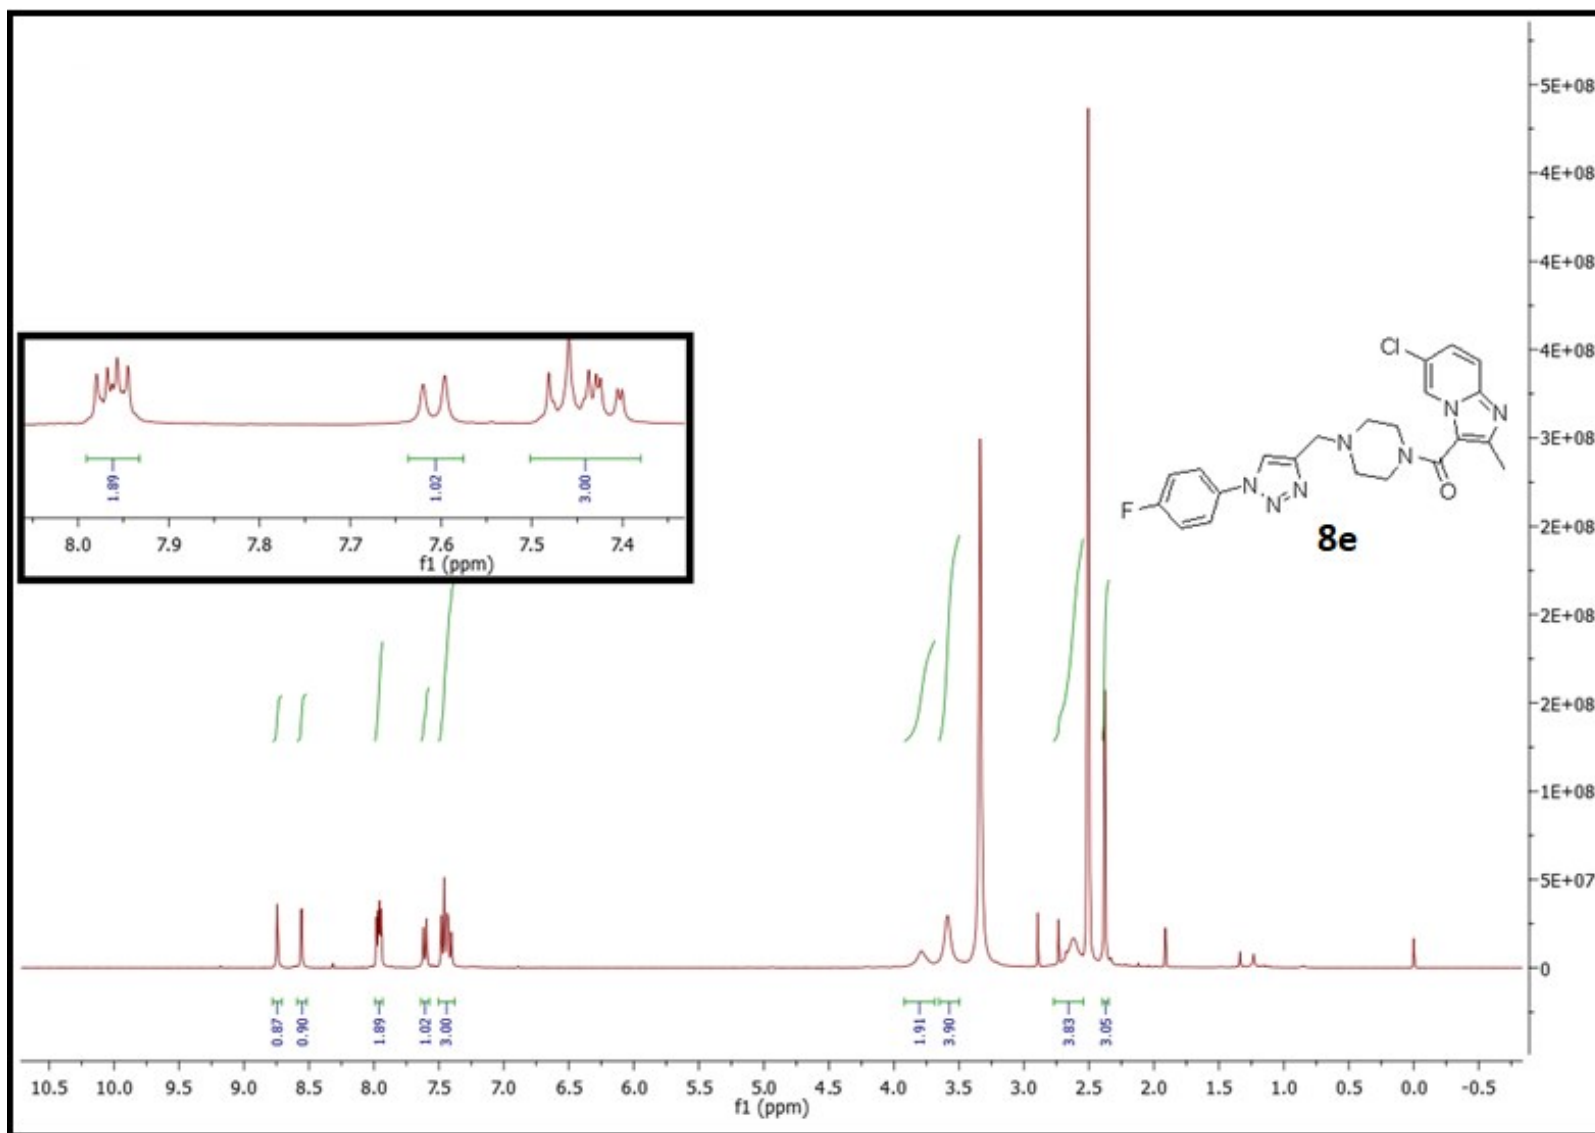

$^1\text{H NMR}$  of **8e**



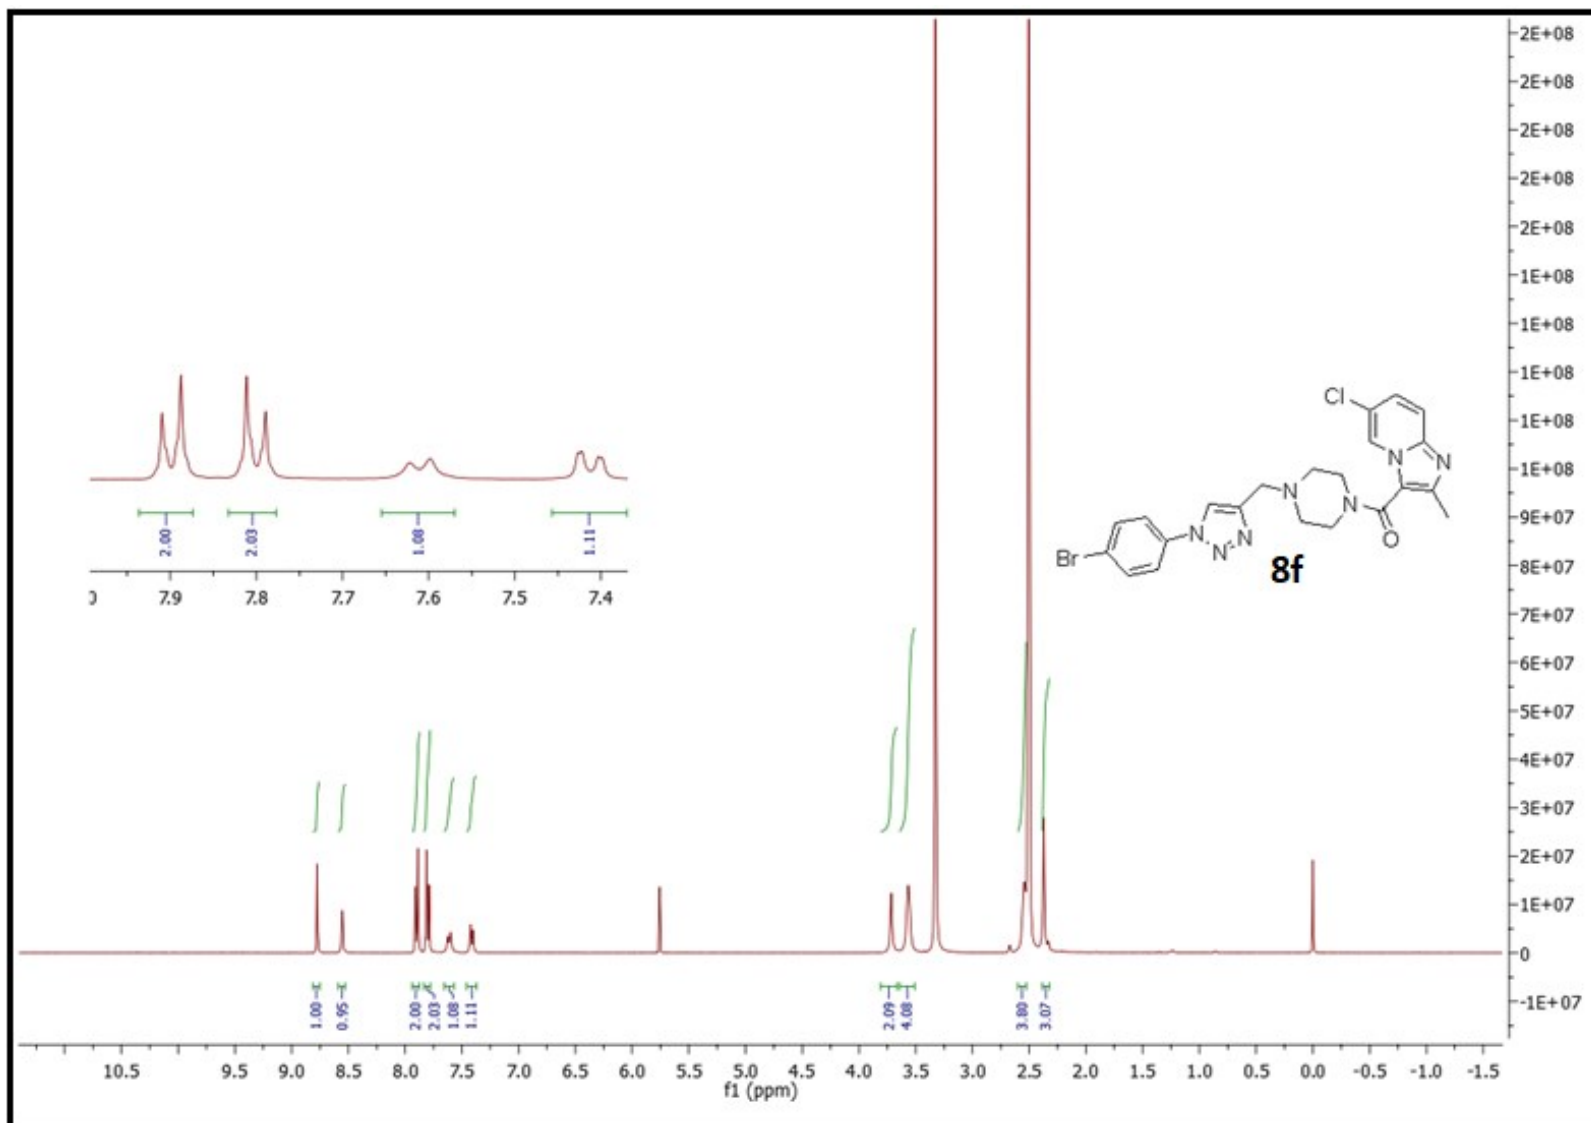

**<sup>1</sup>H NMR of 8f**

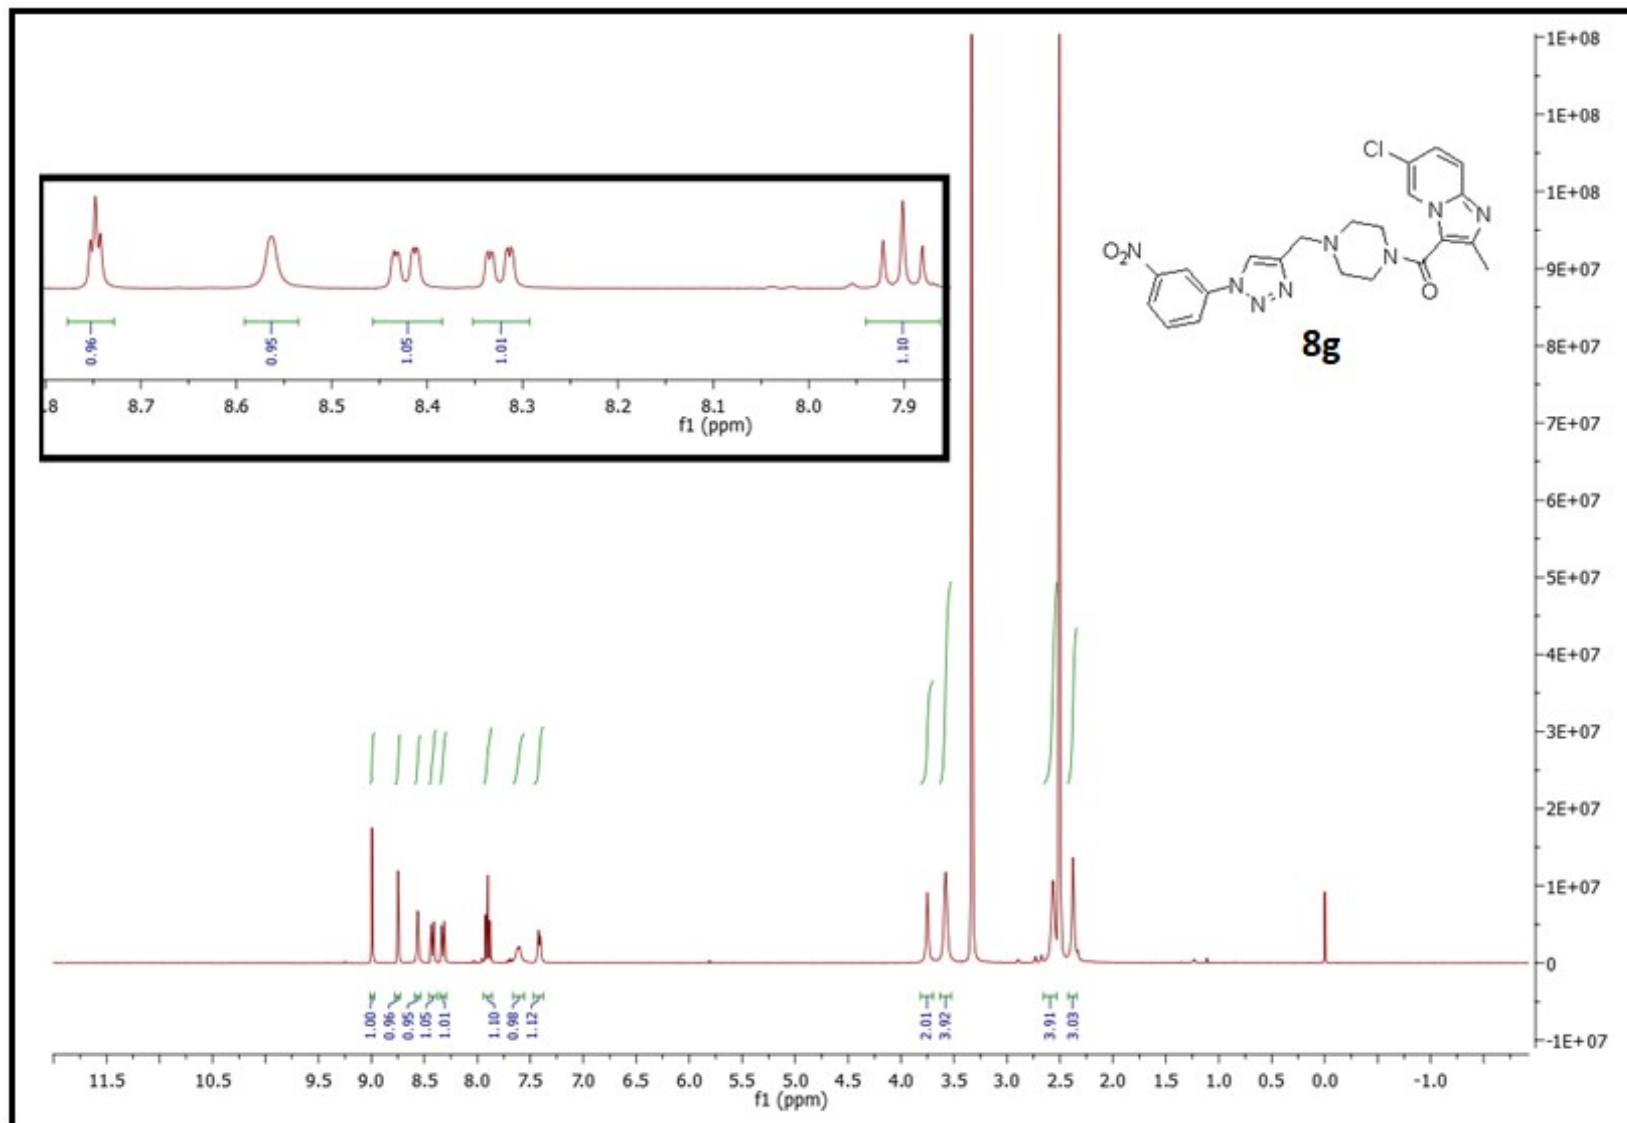

**<sup>1</sup>H NMR of 8g**

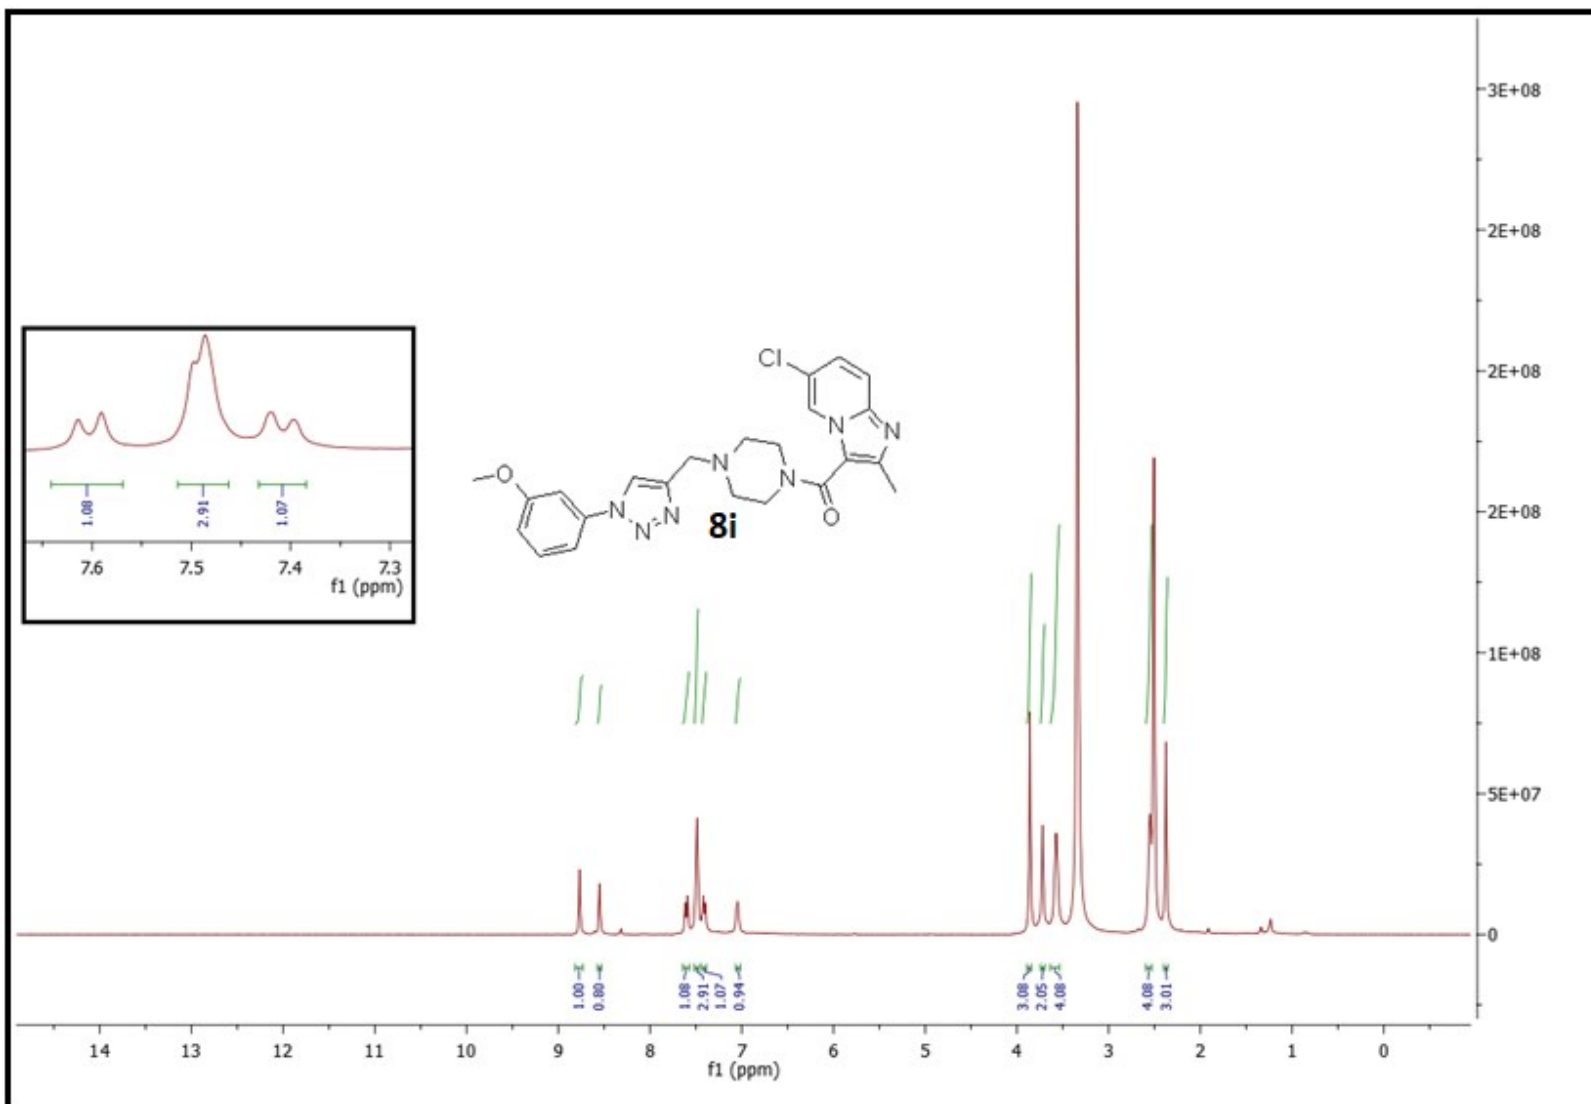

<sup>1</sup>H NMR of **8i**

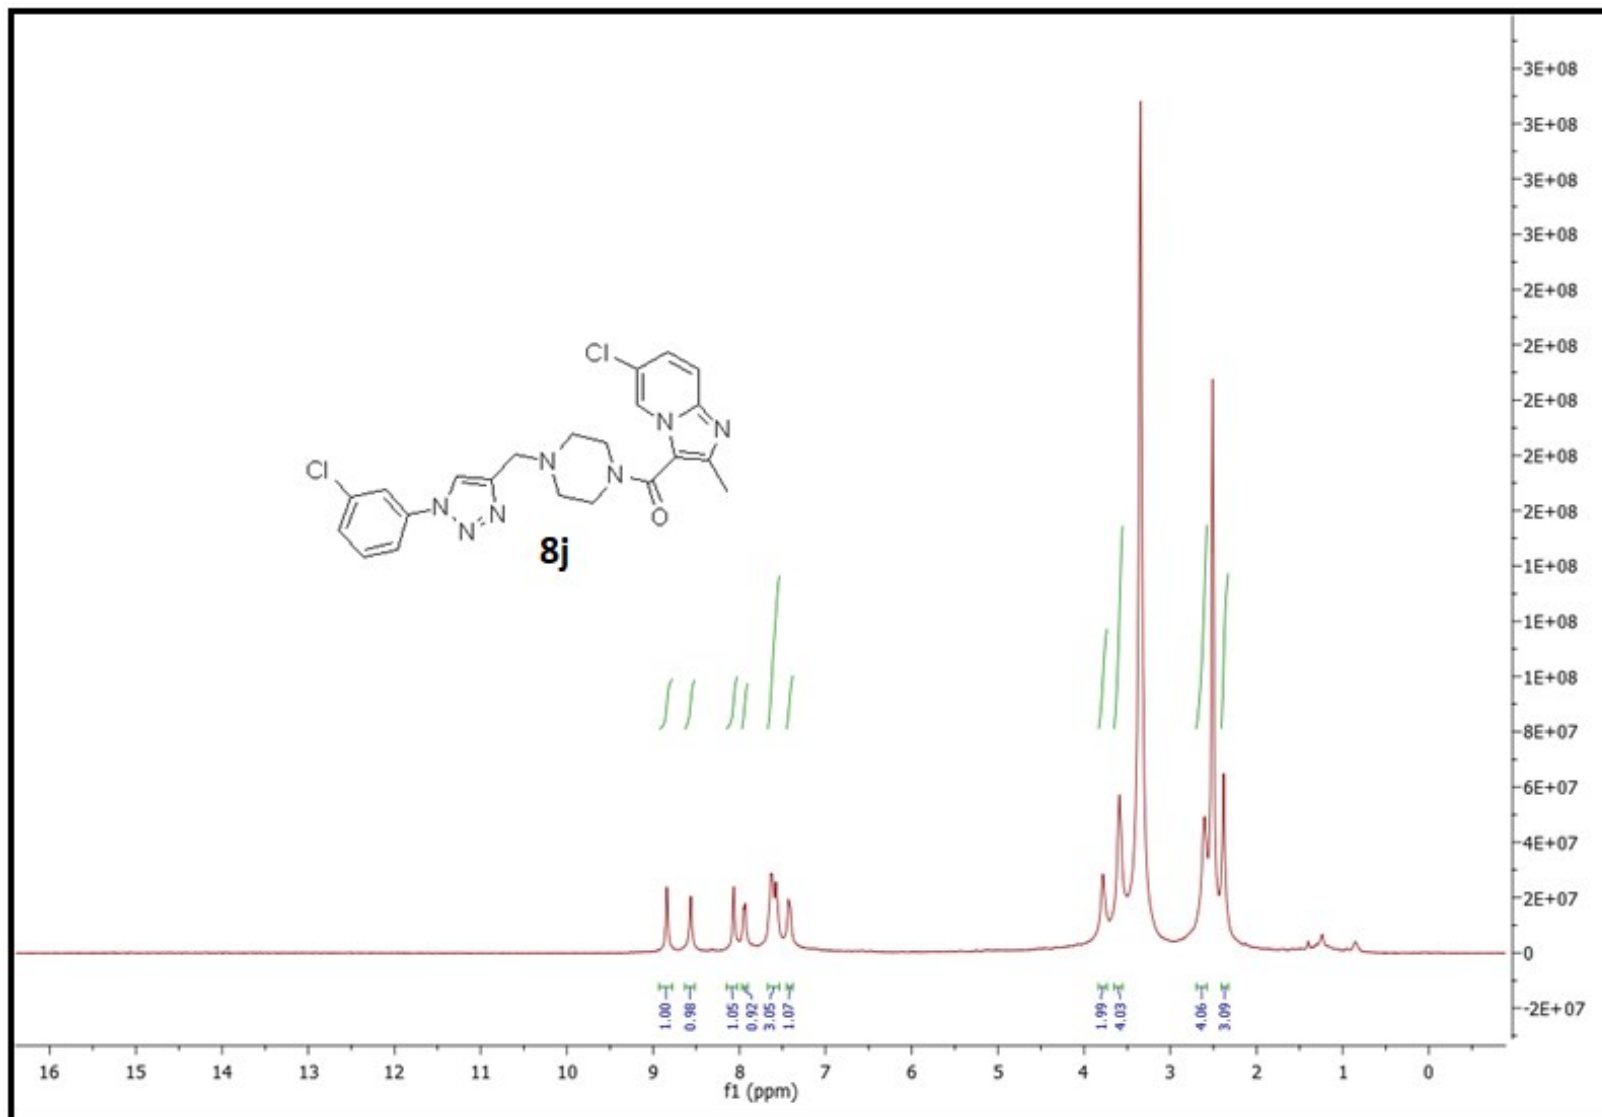

$^1\text{H NMR}$  of **8j**

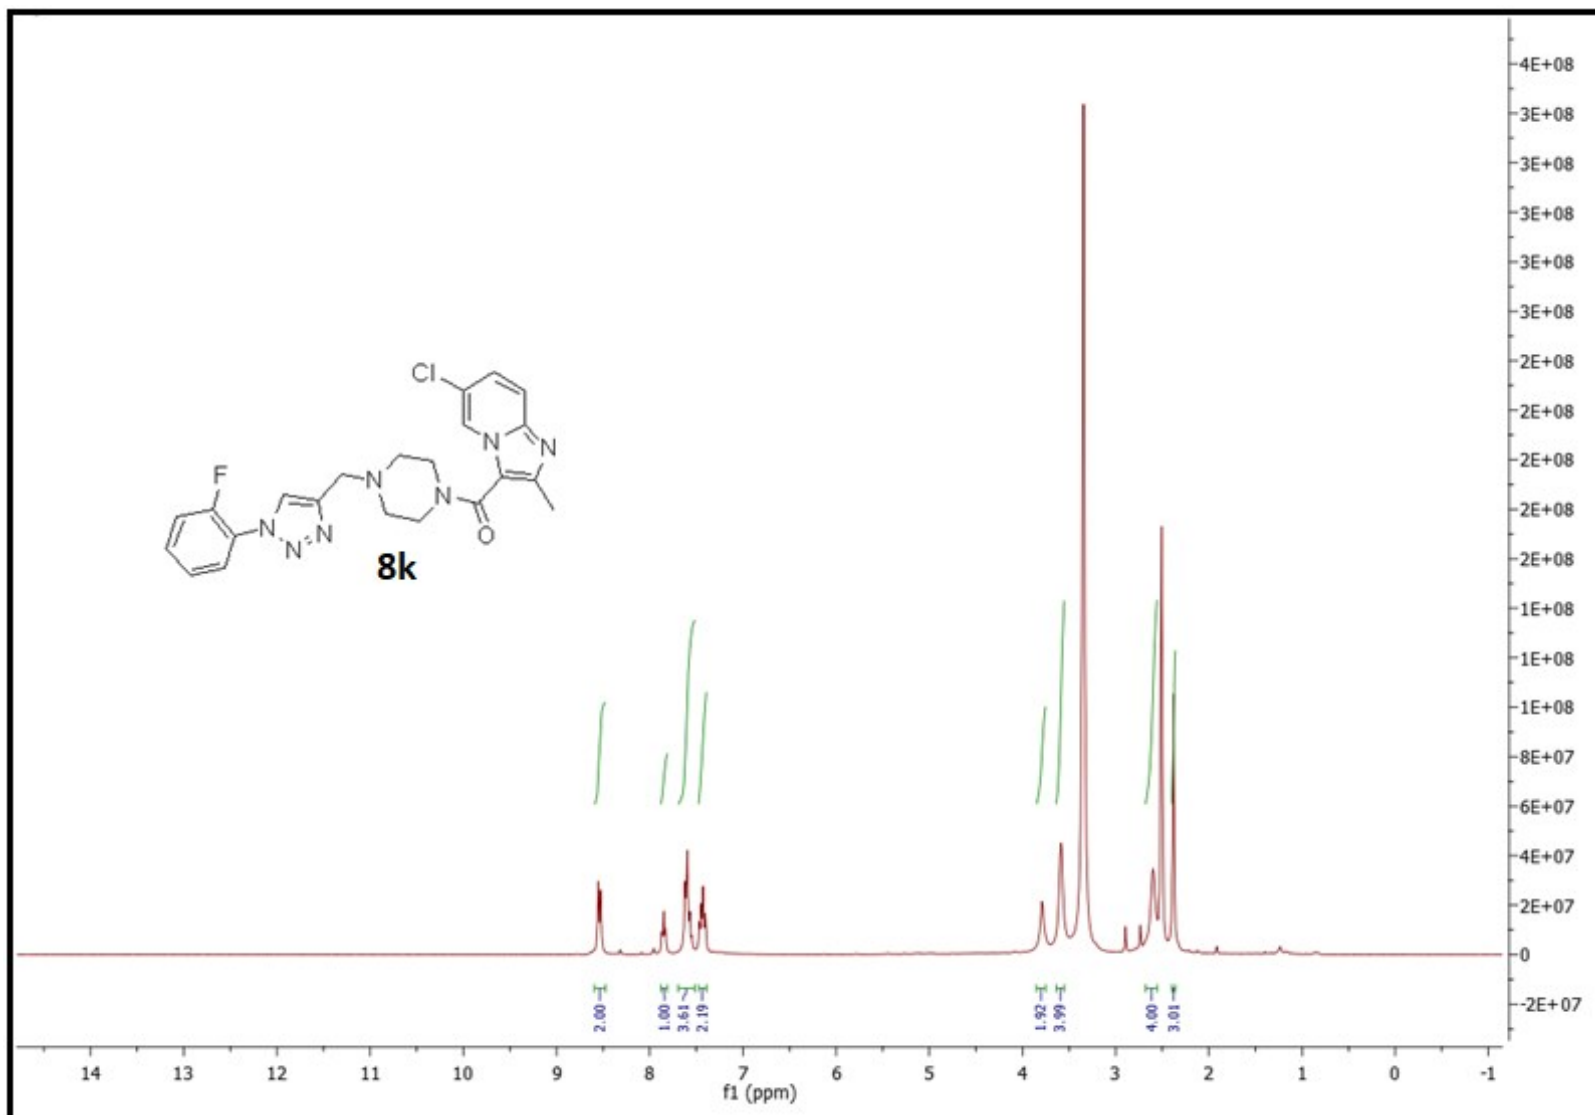

$^1\text{H NMR}$  of **8k**

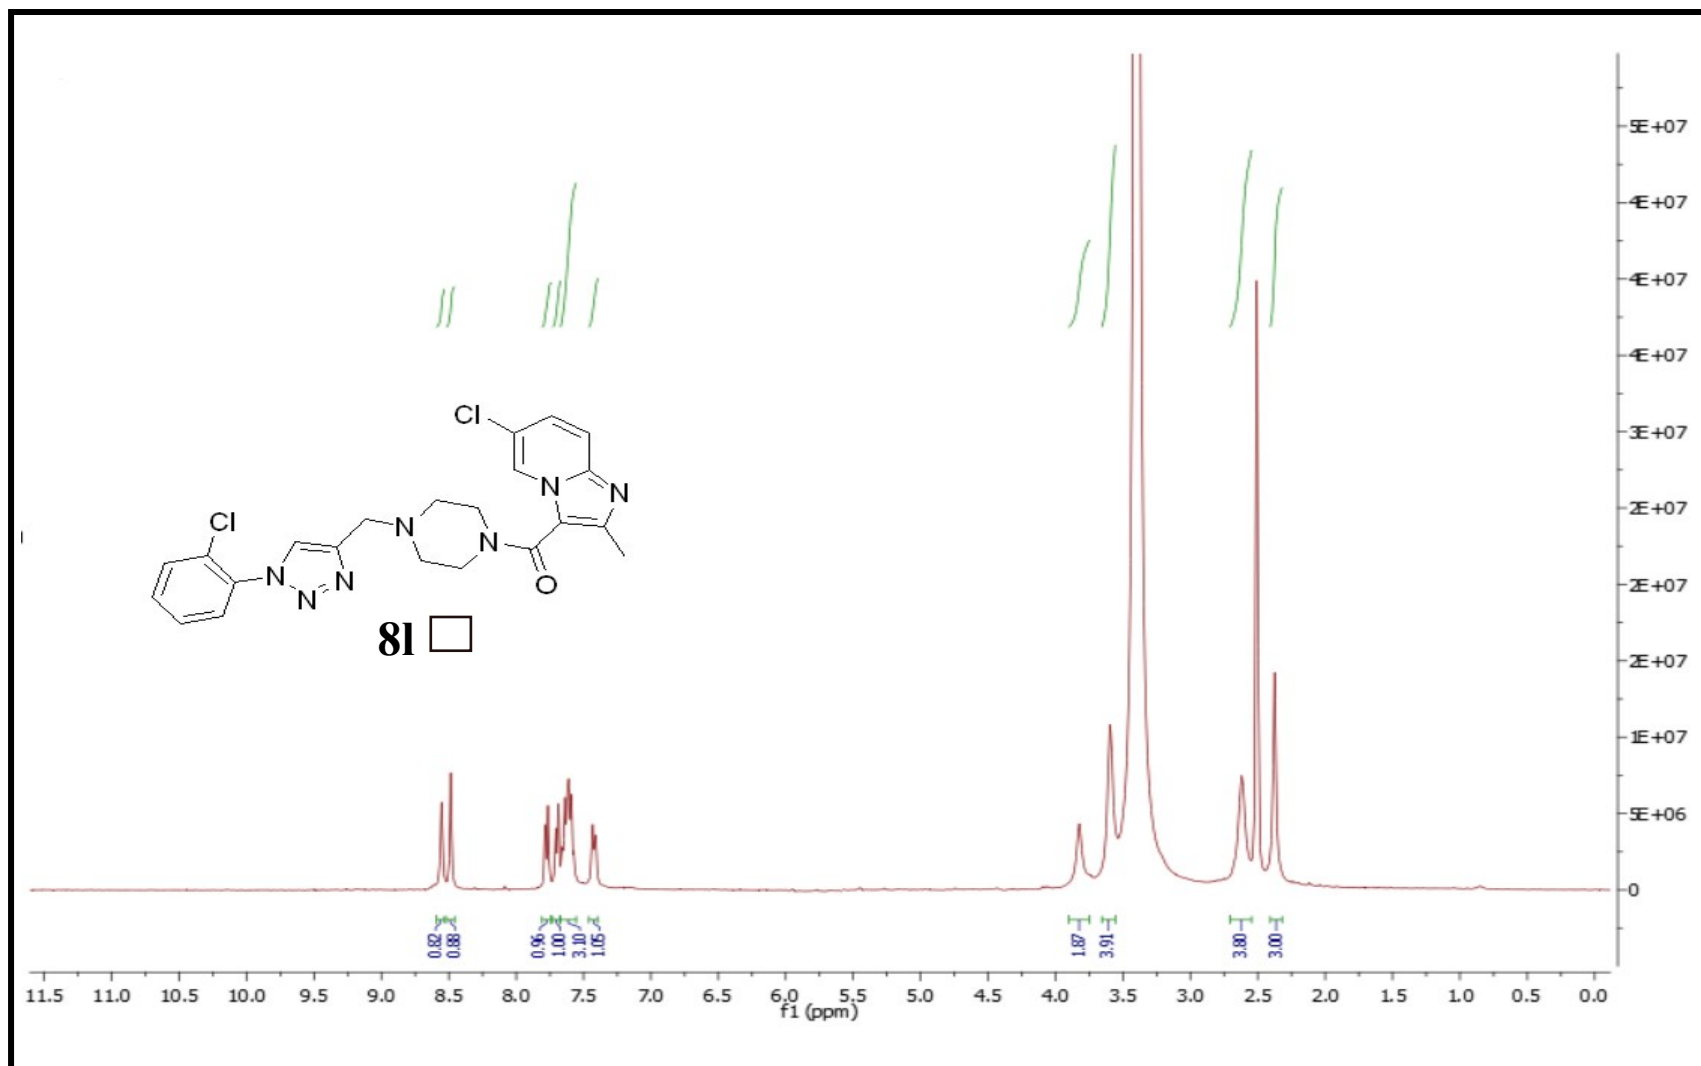

<sup>1</sup>H NMR of 81

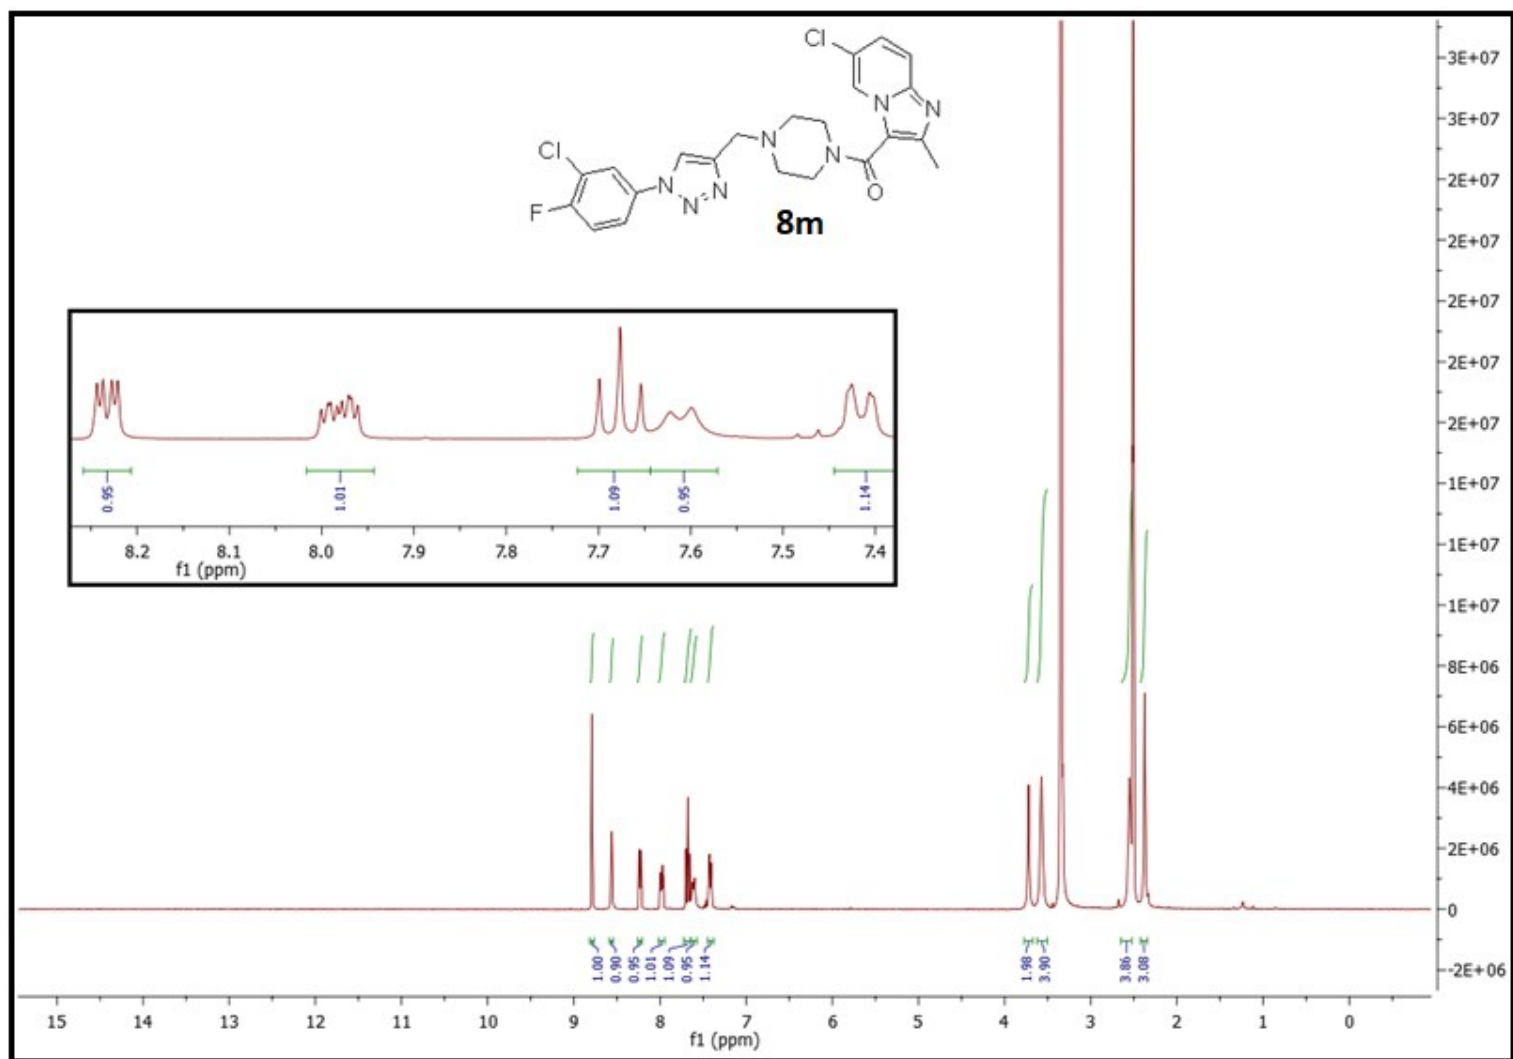

<sup>1</sup>H NMR of 8m

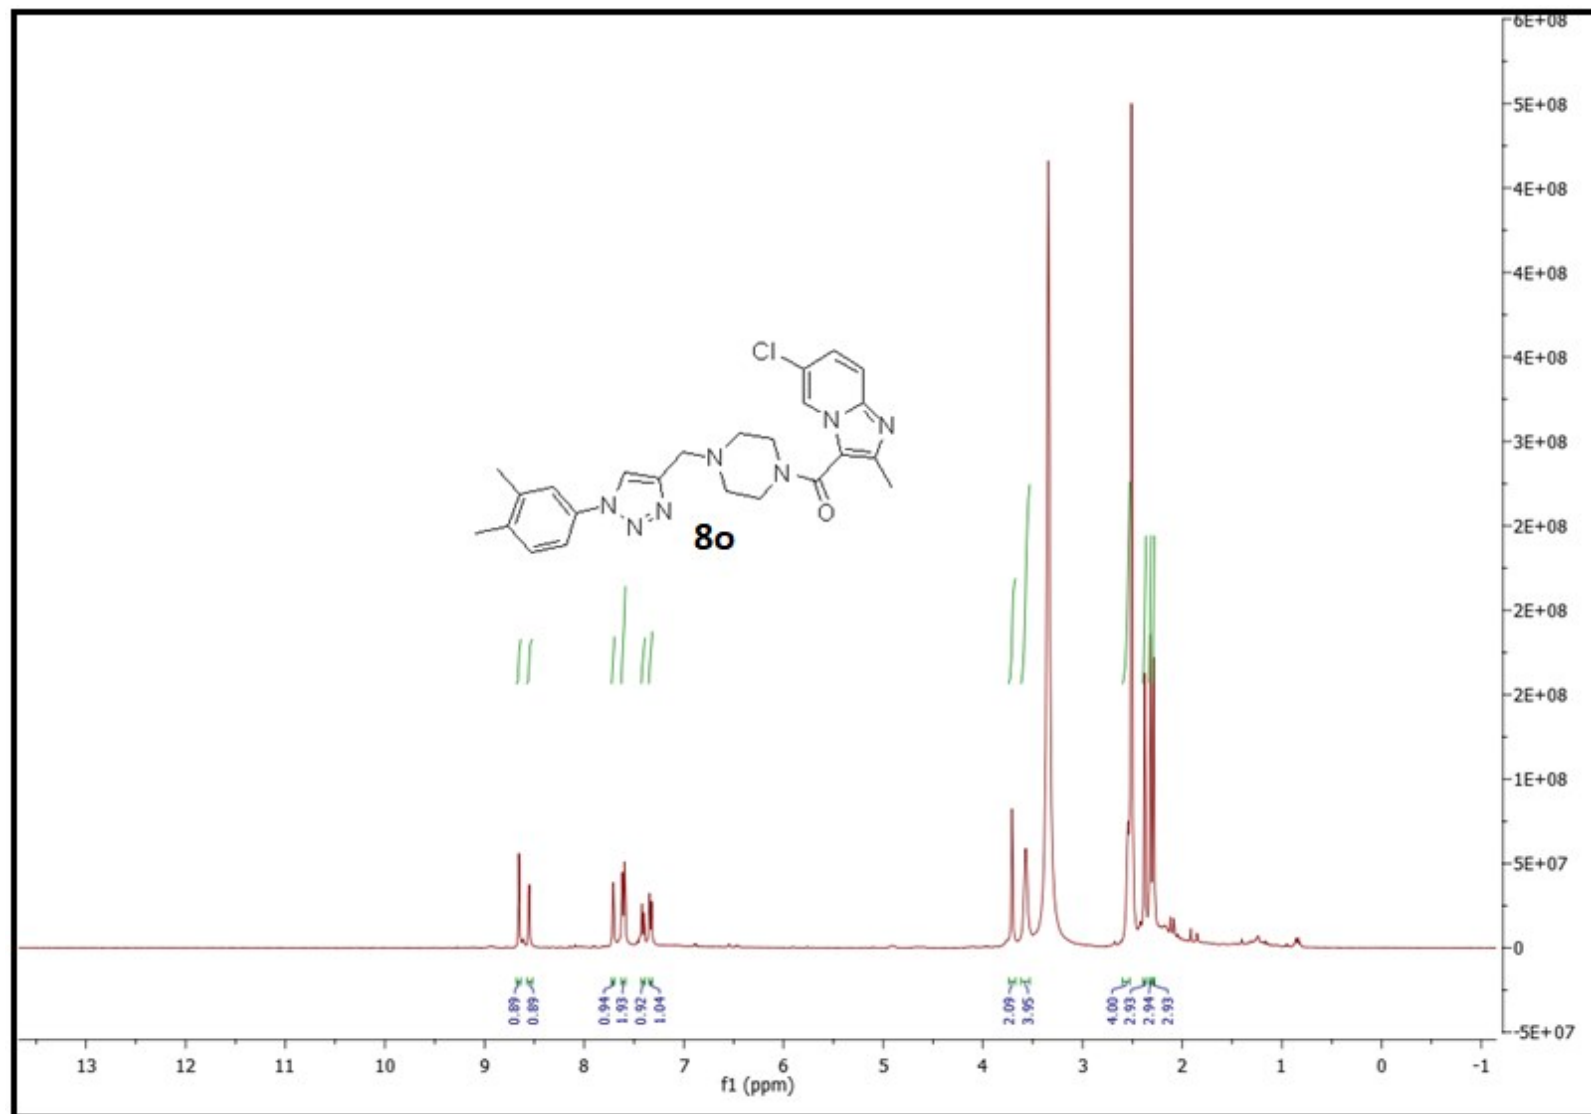

$^1\text{H}$ NMR of **8o**



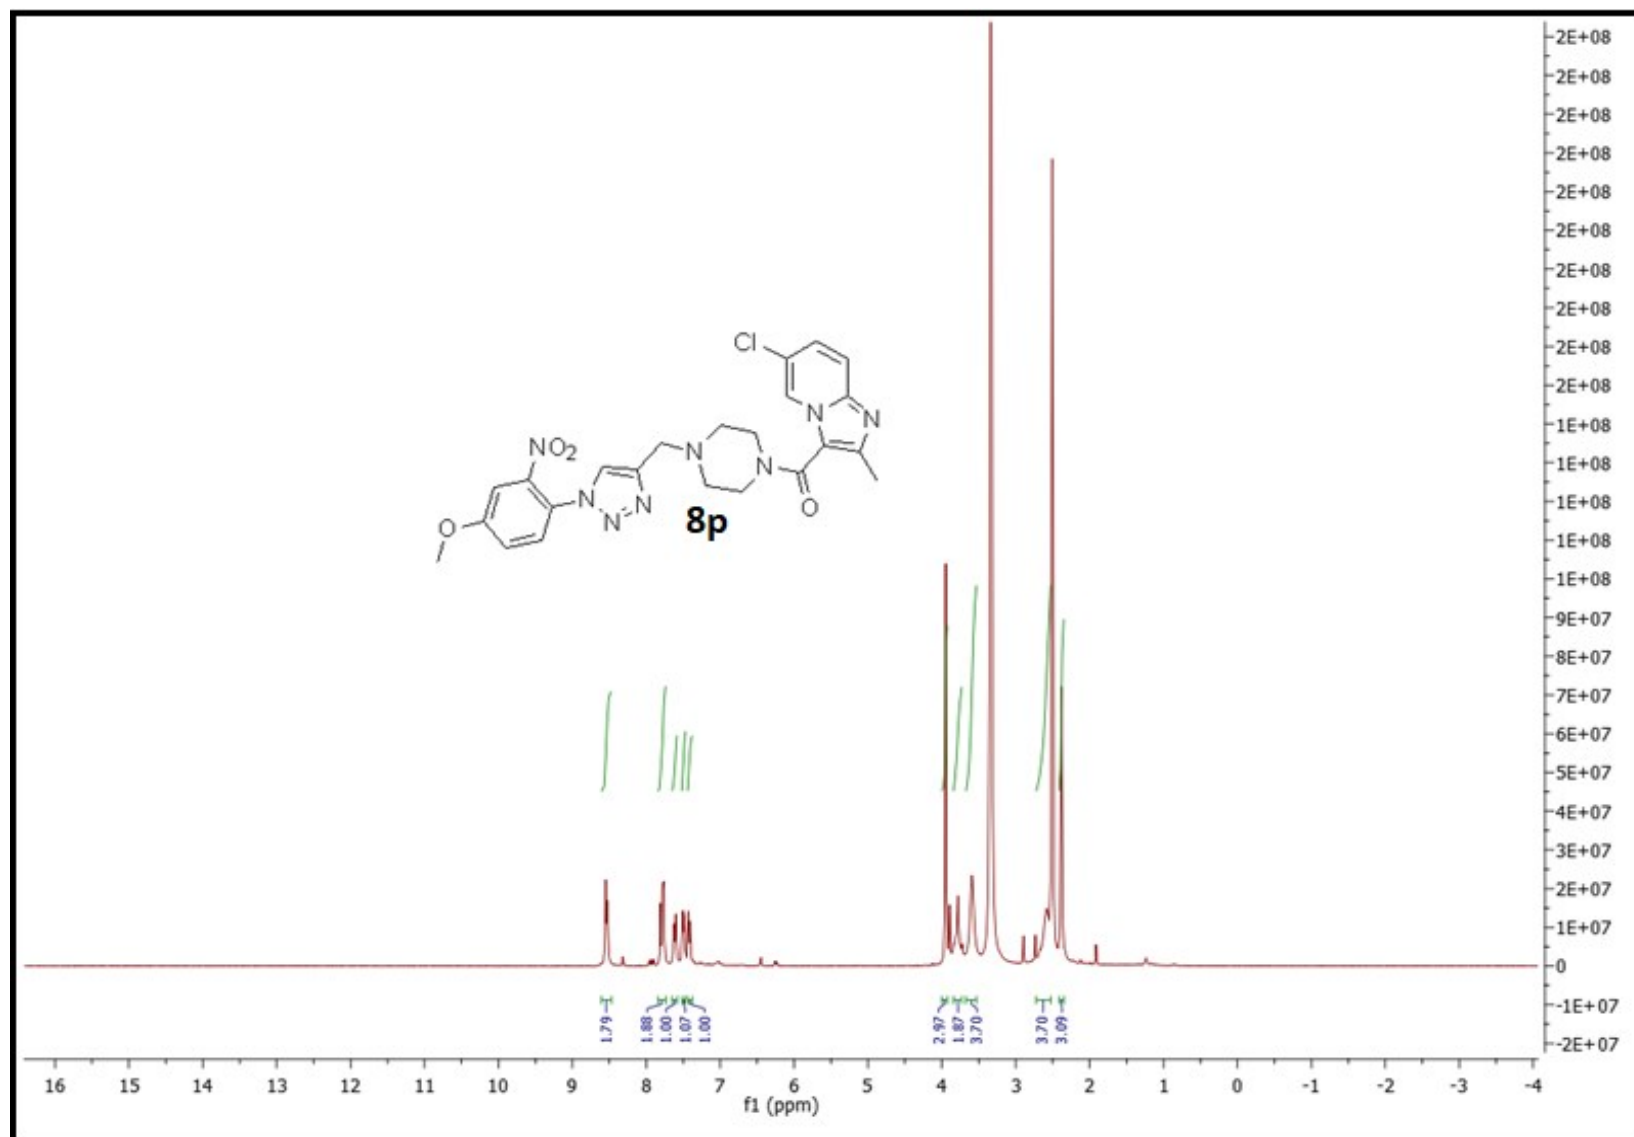

$^1\text{H NMR}$  of 8p

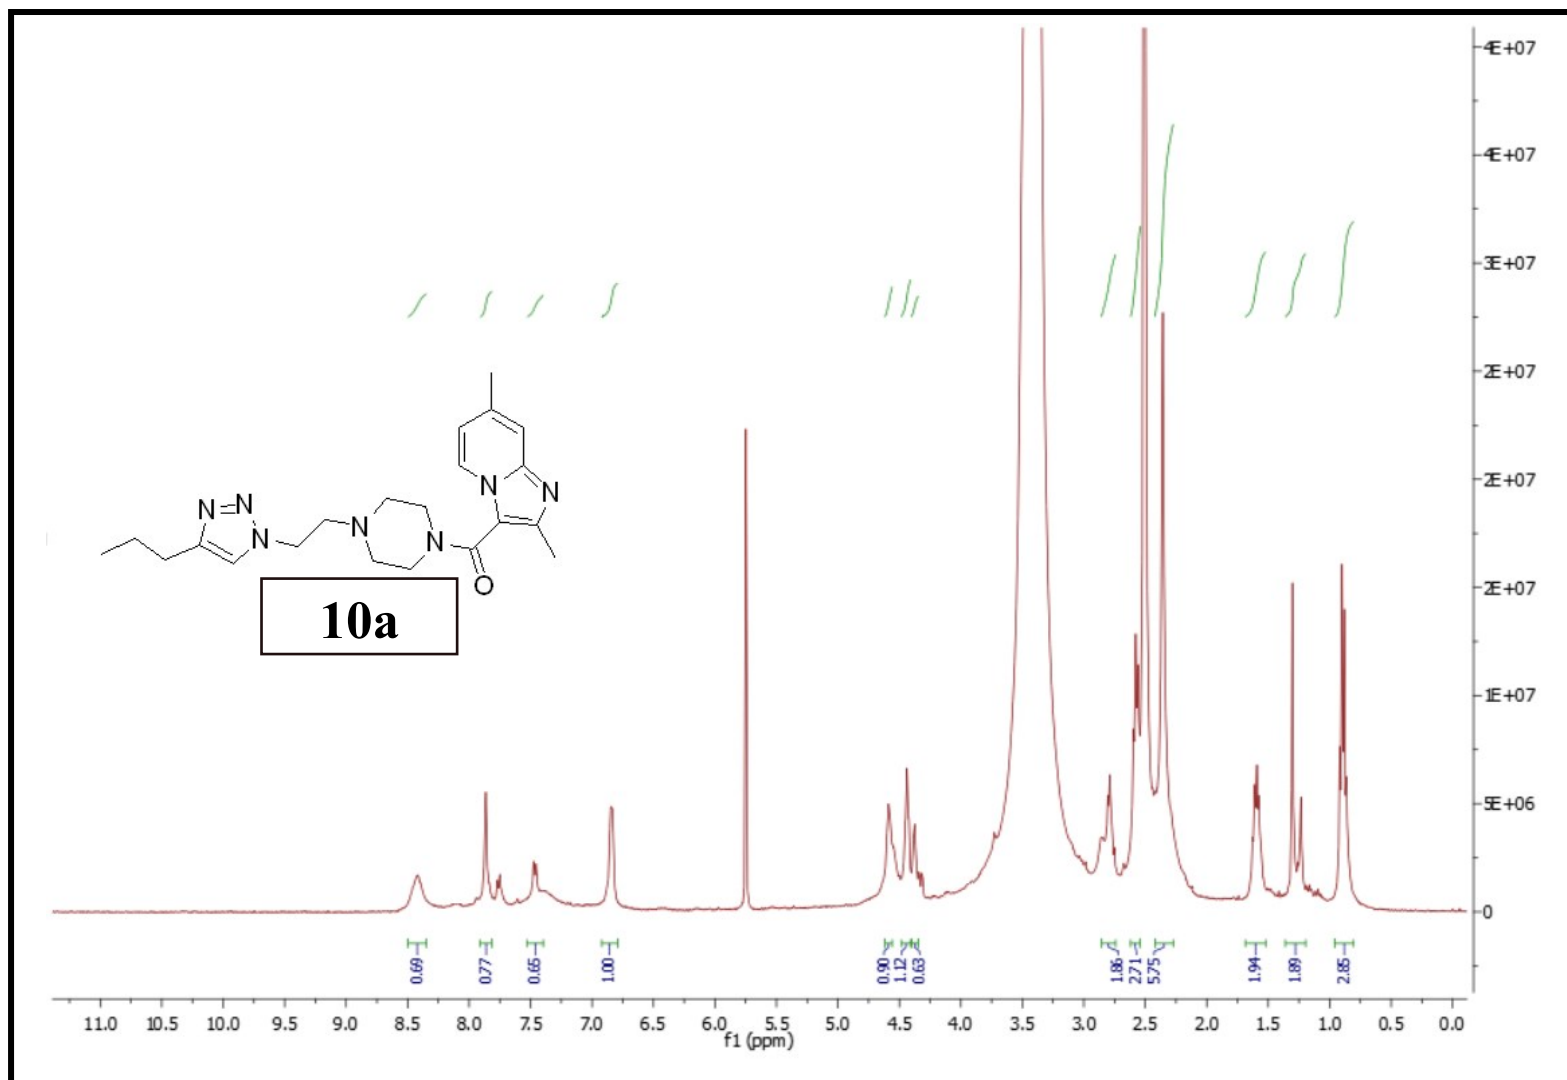

<sup>1</sup>H NMR of 10a

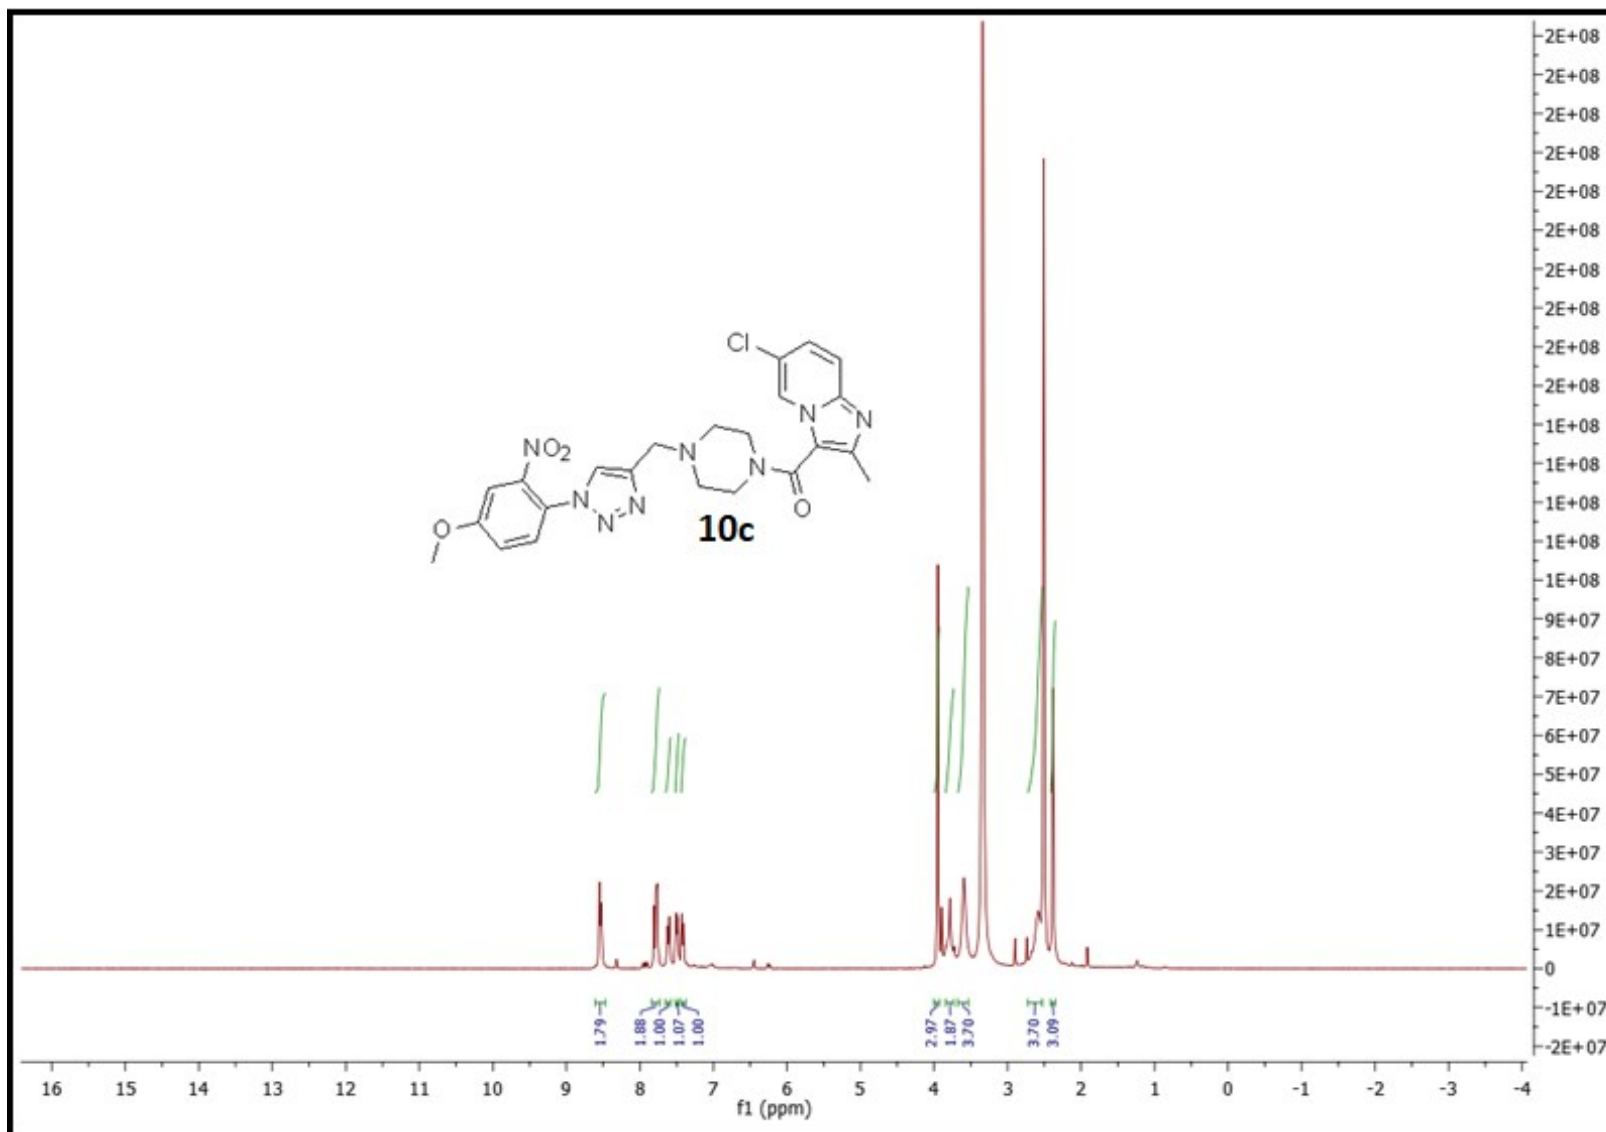

**<sup>1</sup>H NMR of 10c**

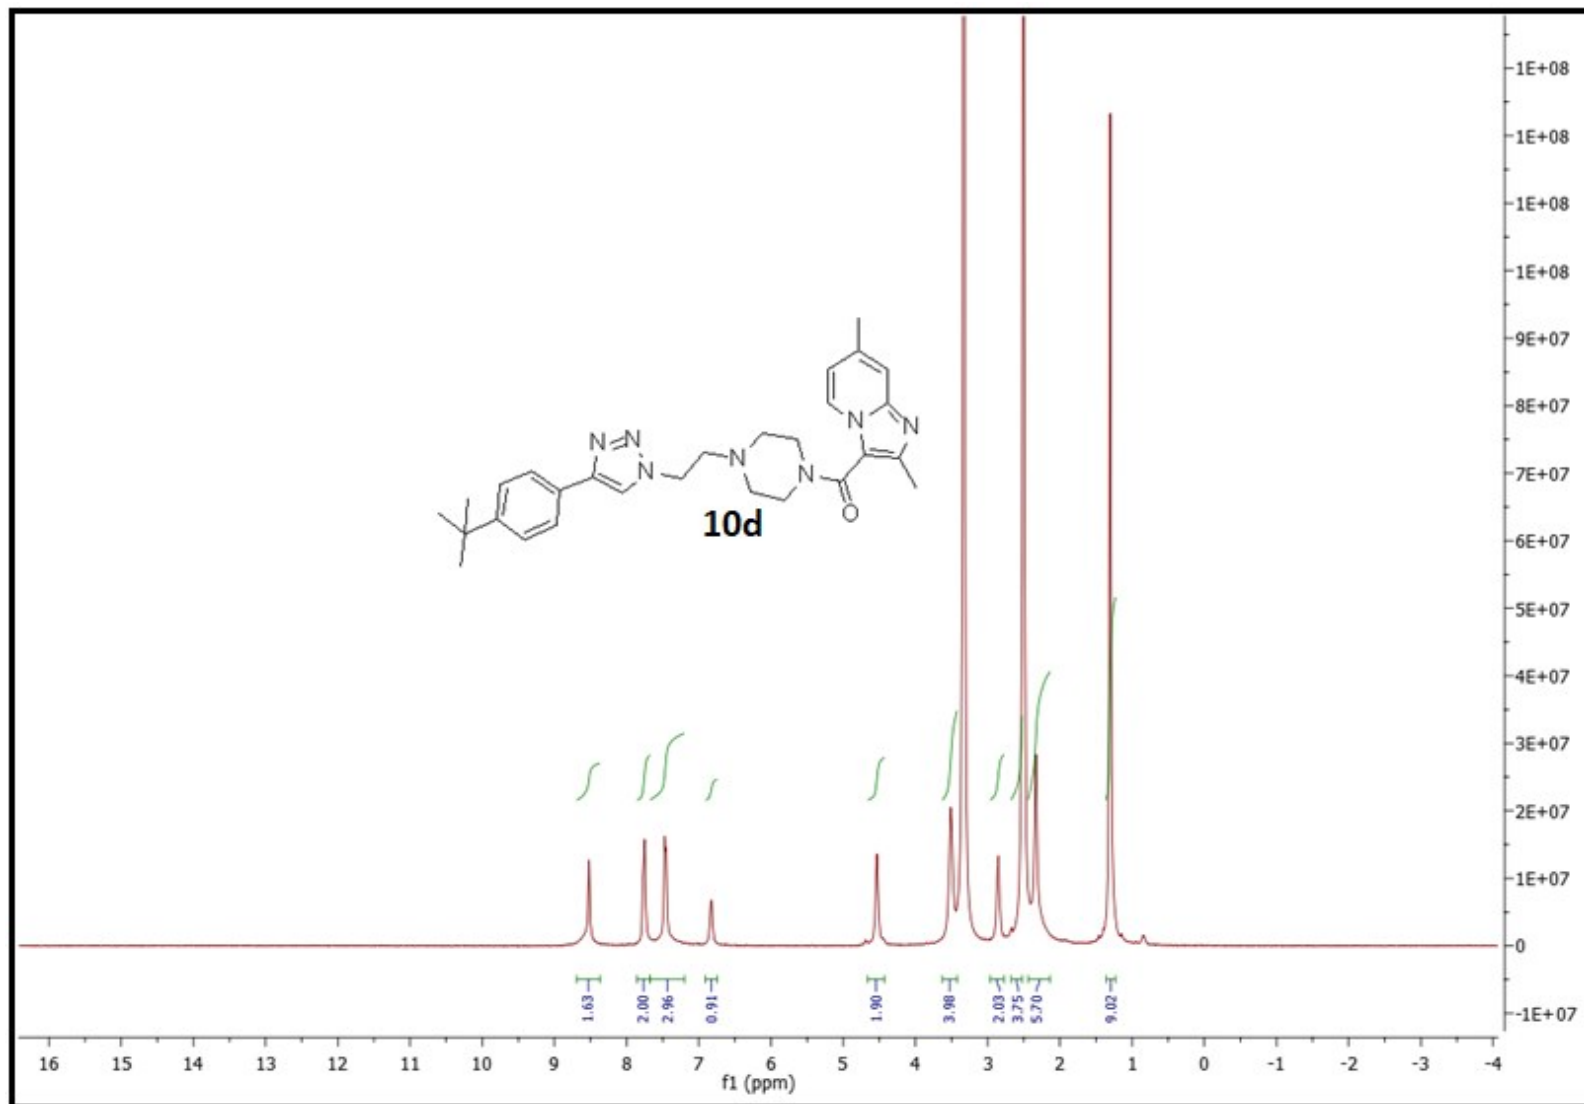

<sup>1</sup>H NMR of 10d

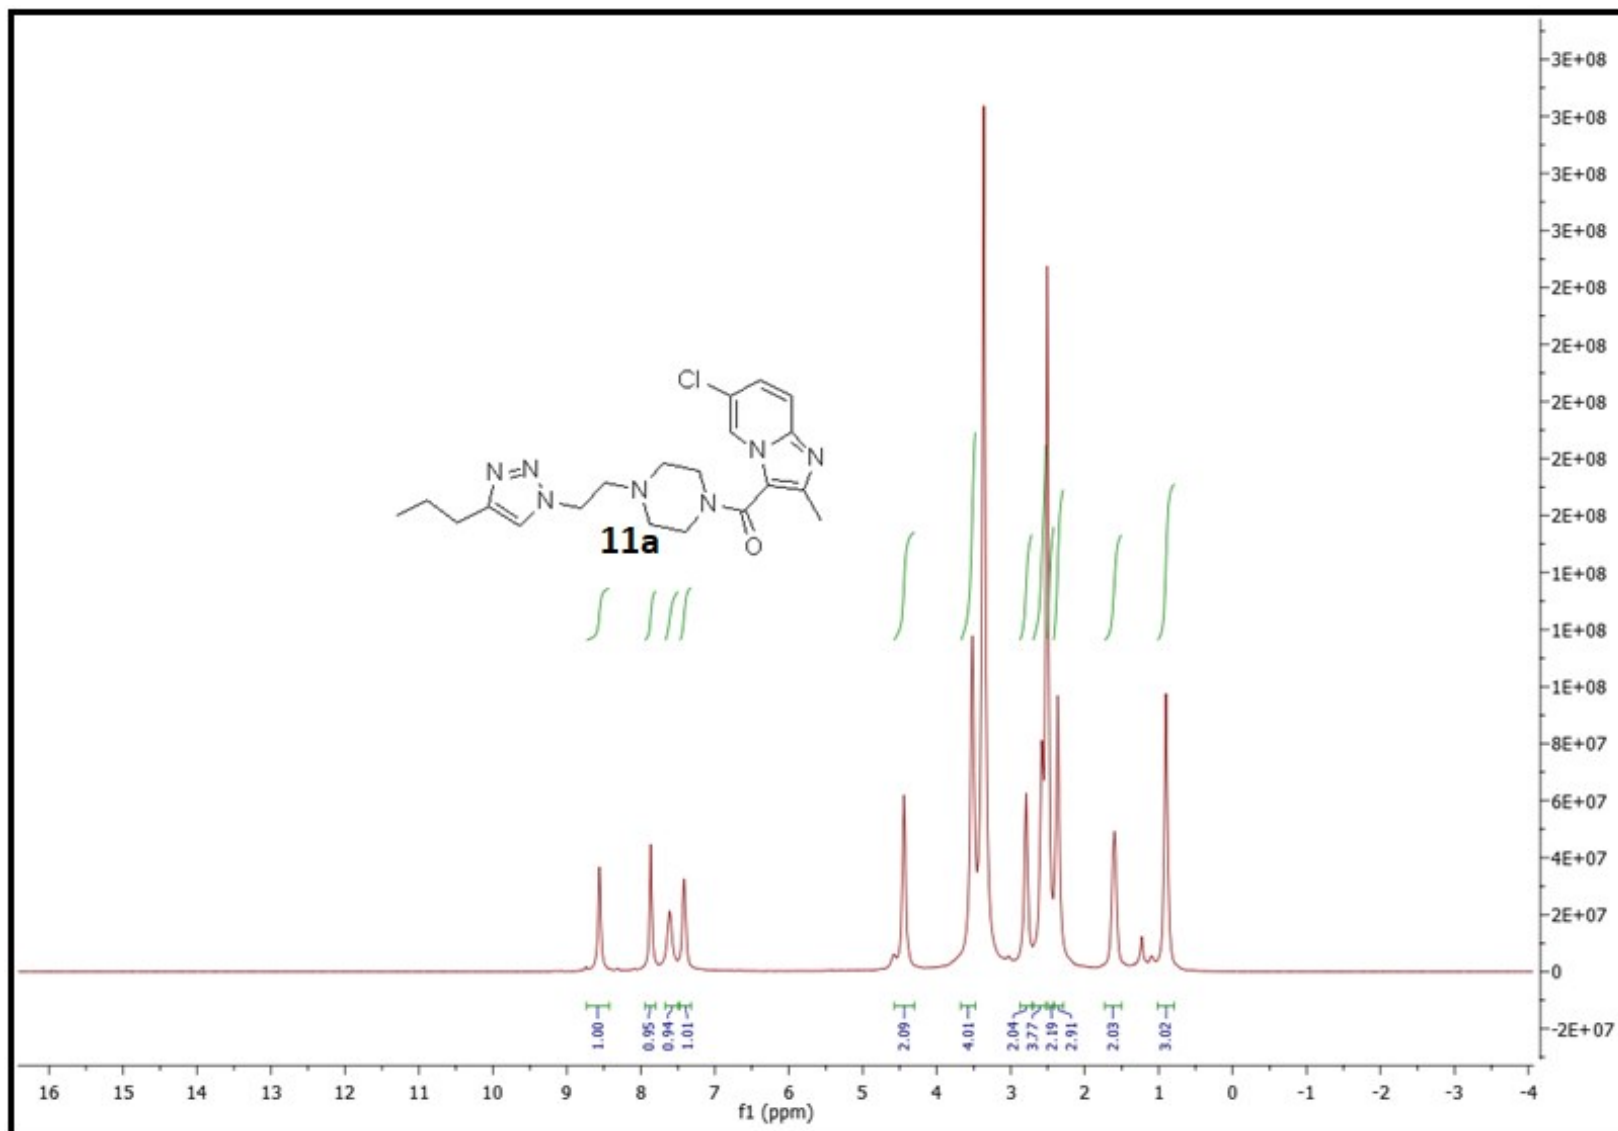

<sup>1</sup>H NMR of 11a

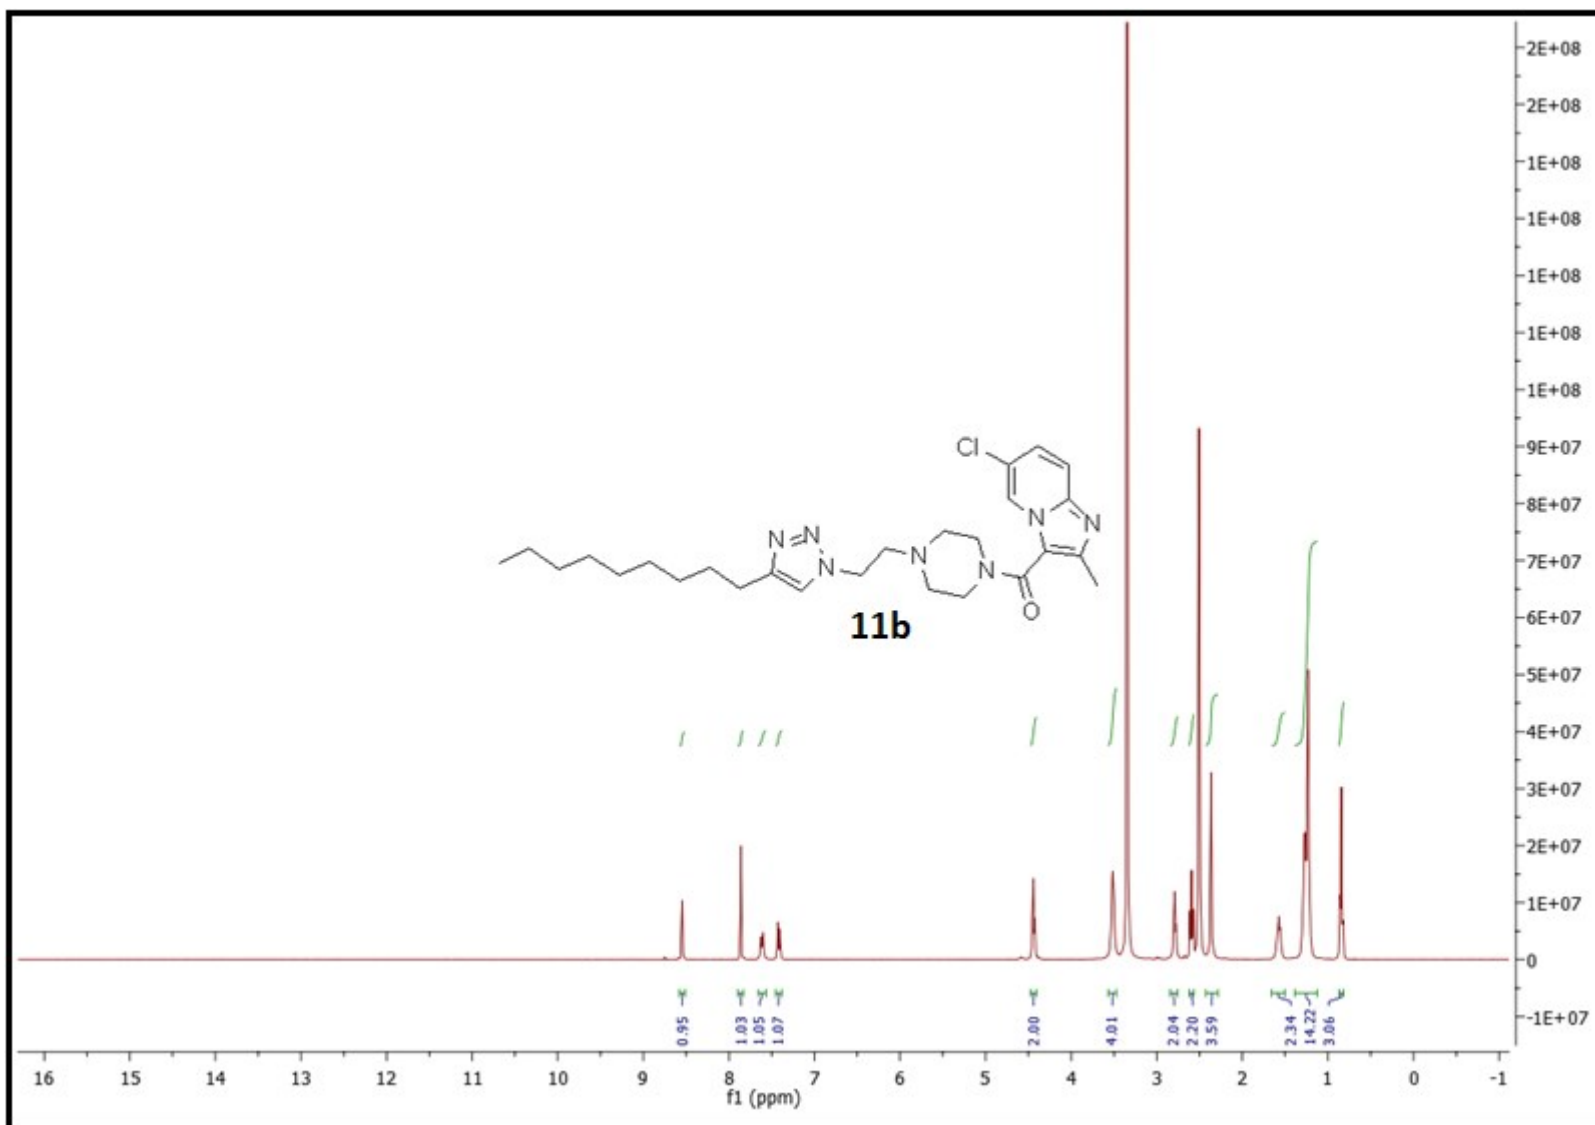

<sup>1</sup>H NMR of 11b

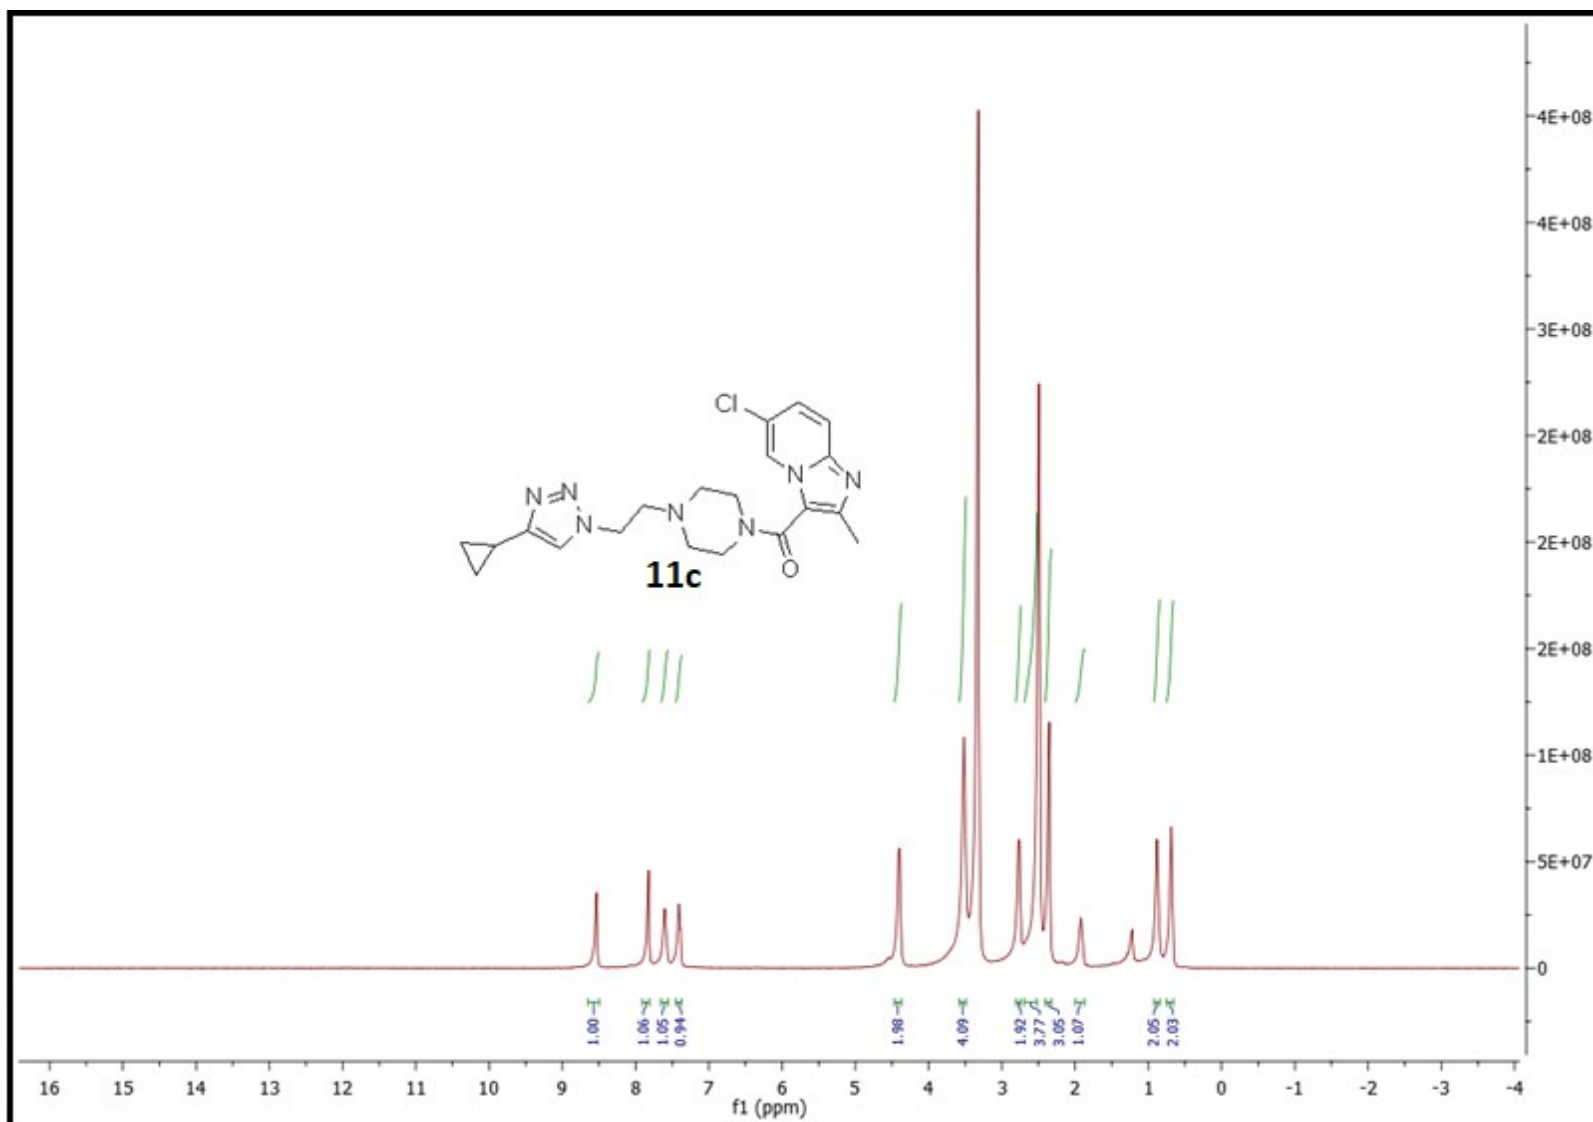

<sup>1</sup>HNMR of 11c

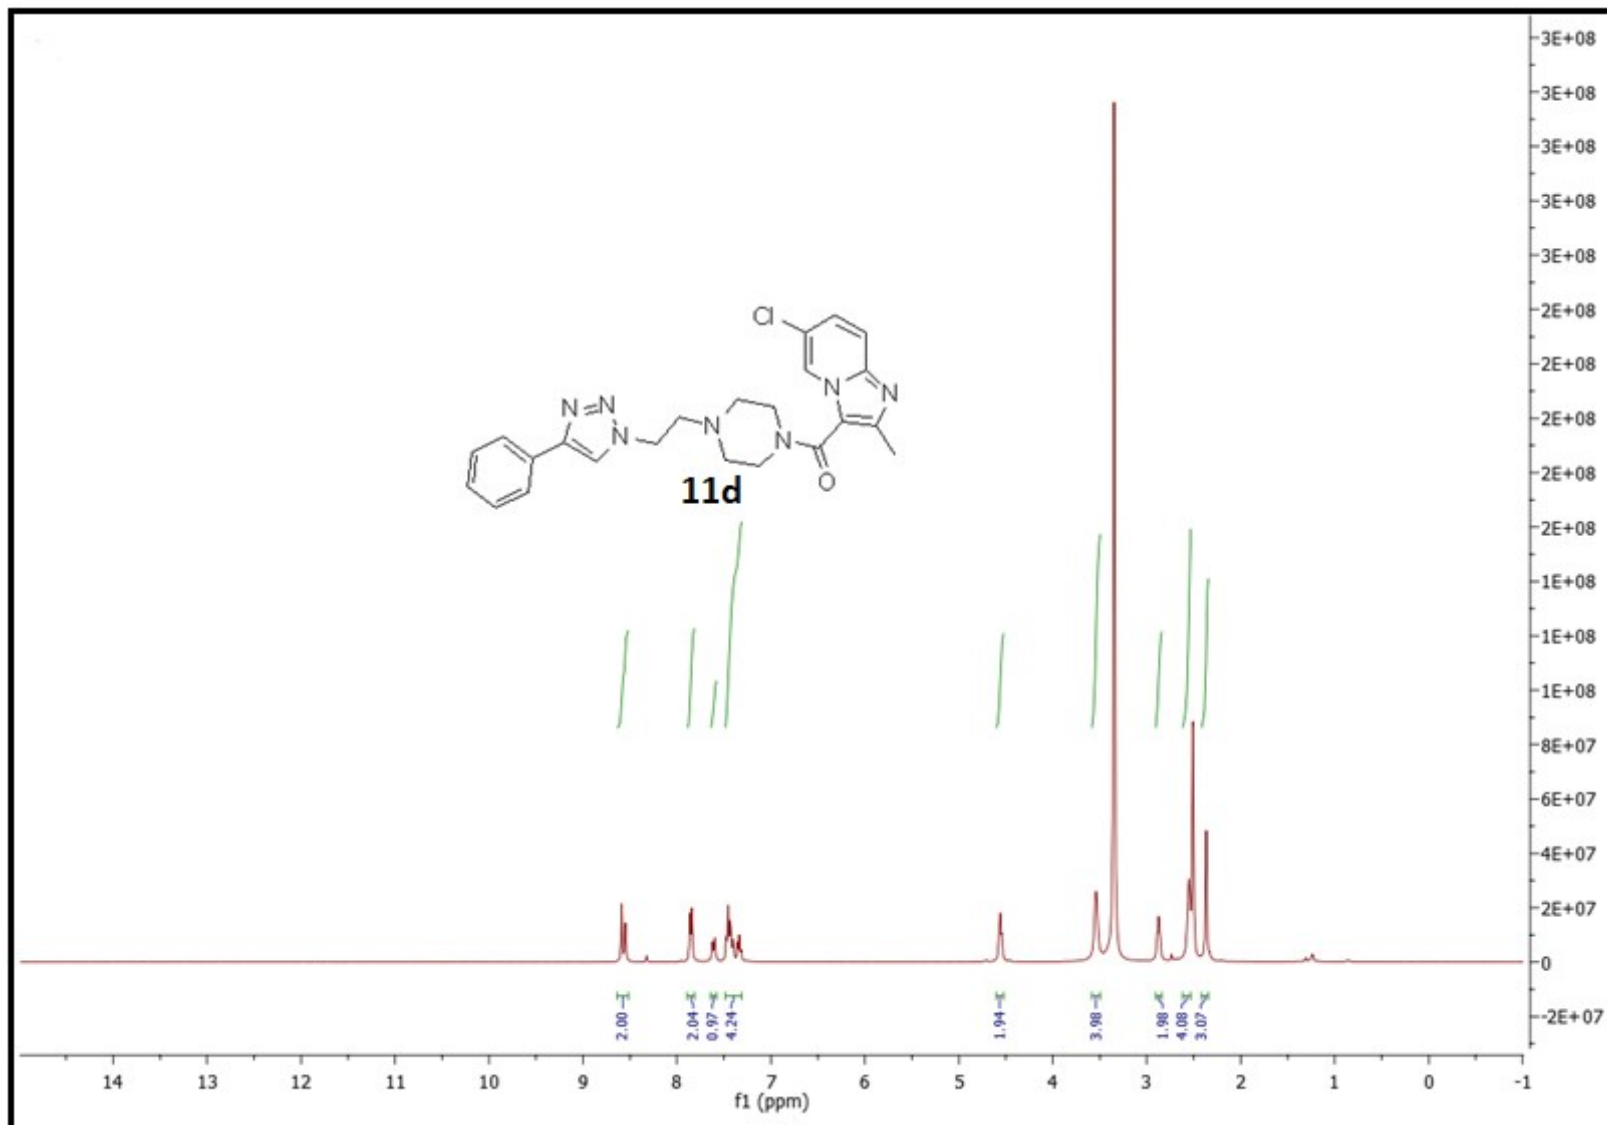

**<sup>1</sup>H NMR of 11d**



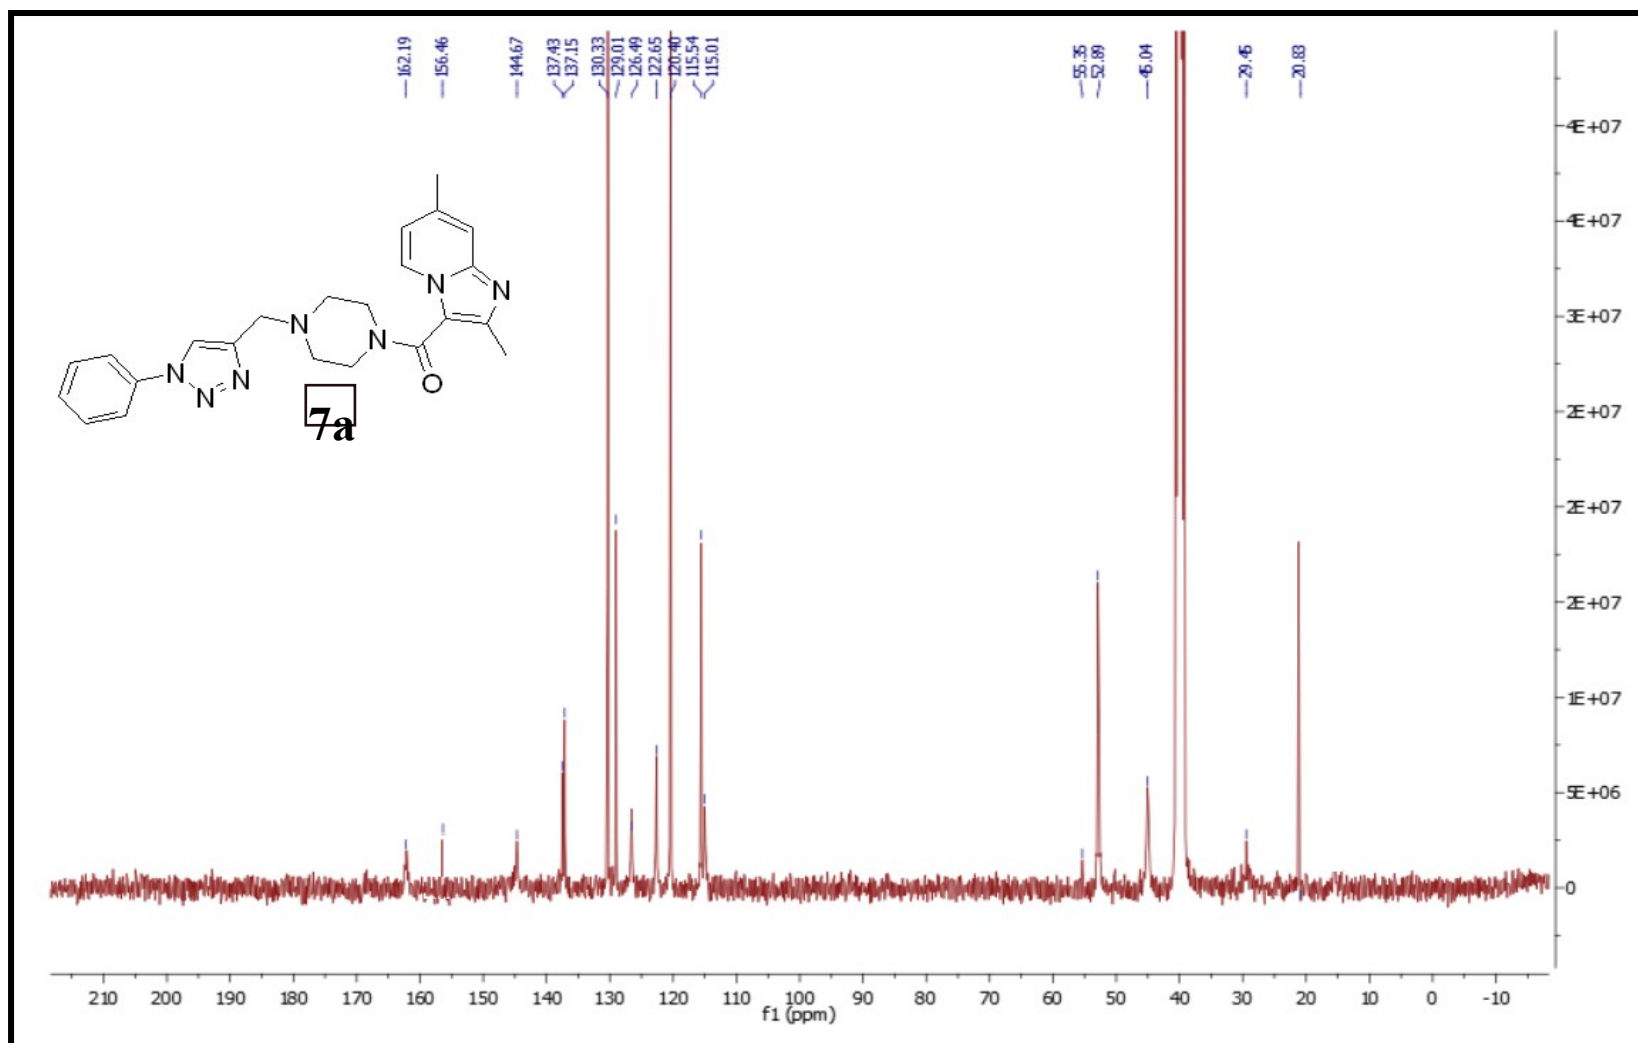

7.  $^{13}\text{C}$ NMR spectra of intermediate compounds and final compounds:

<sup>13</sup>CNMR of 7a

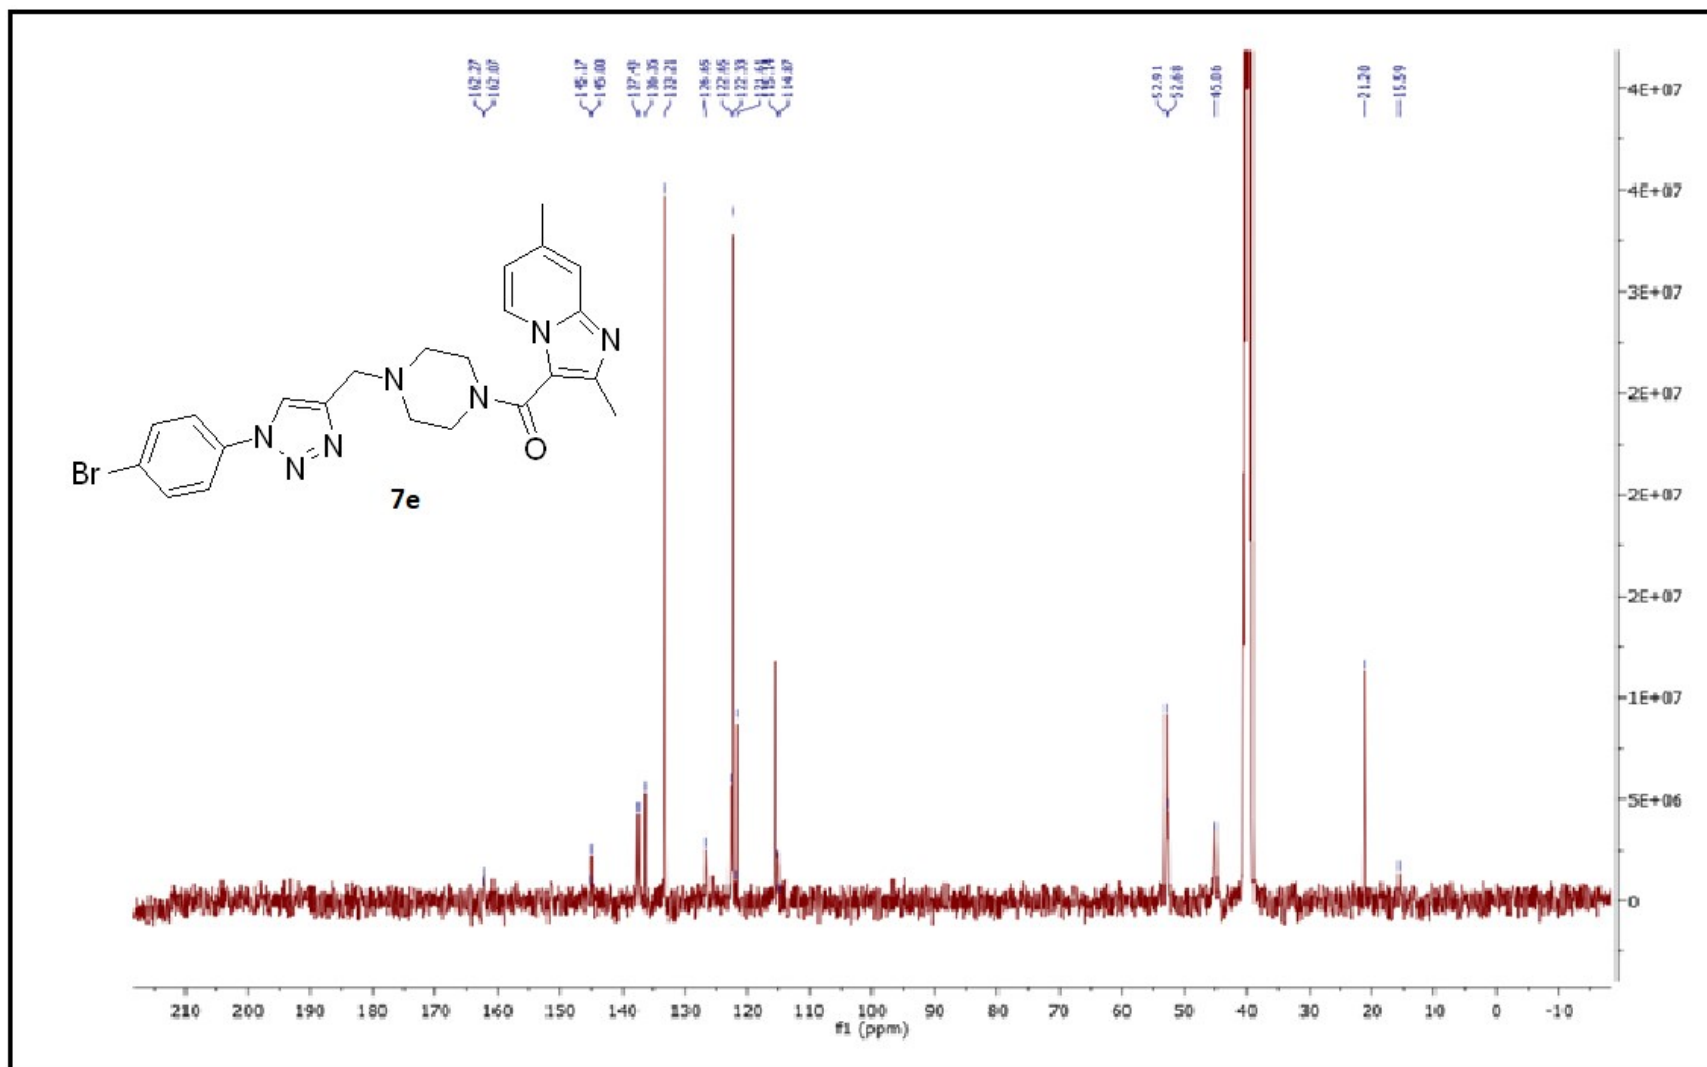

<sup>13</sup>CNMR of 7e

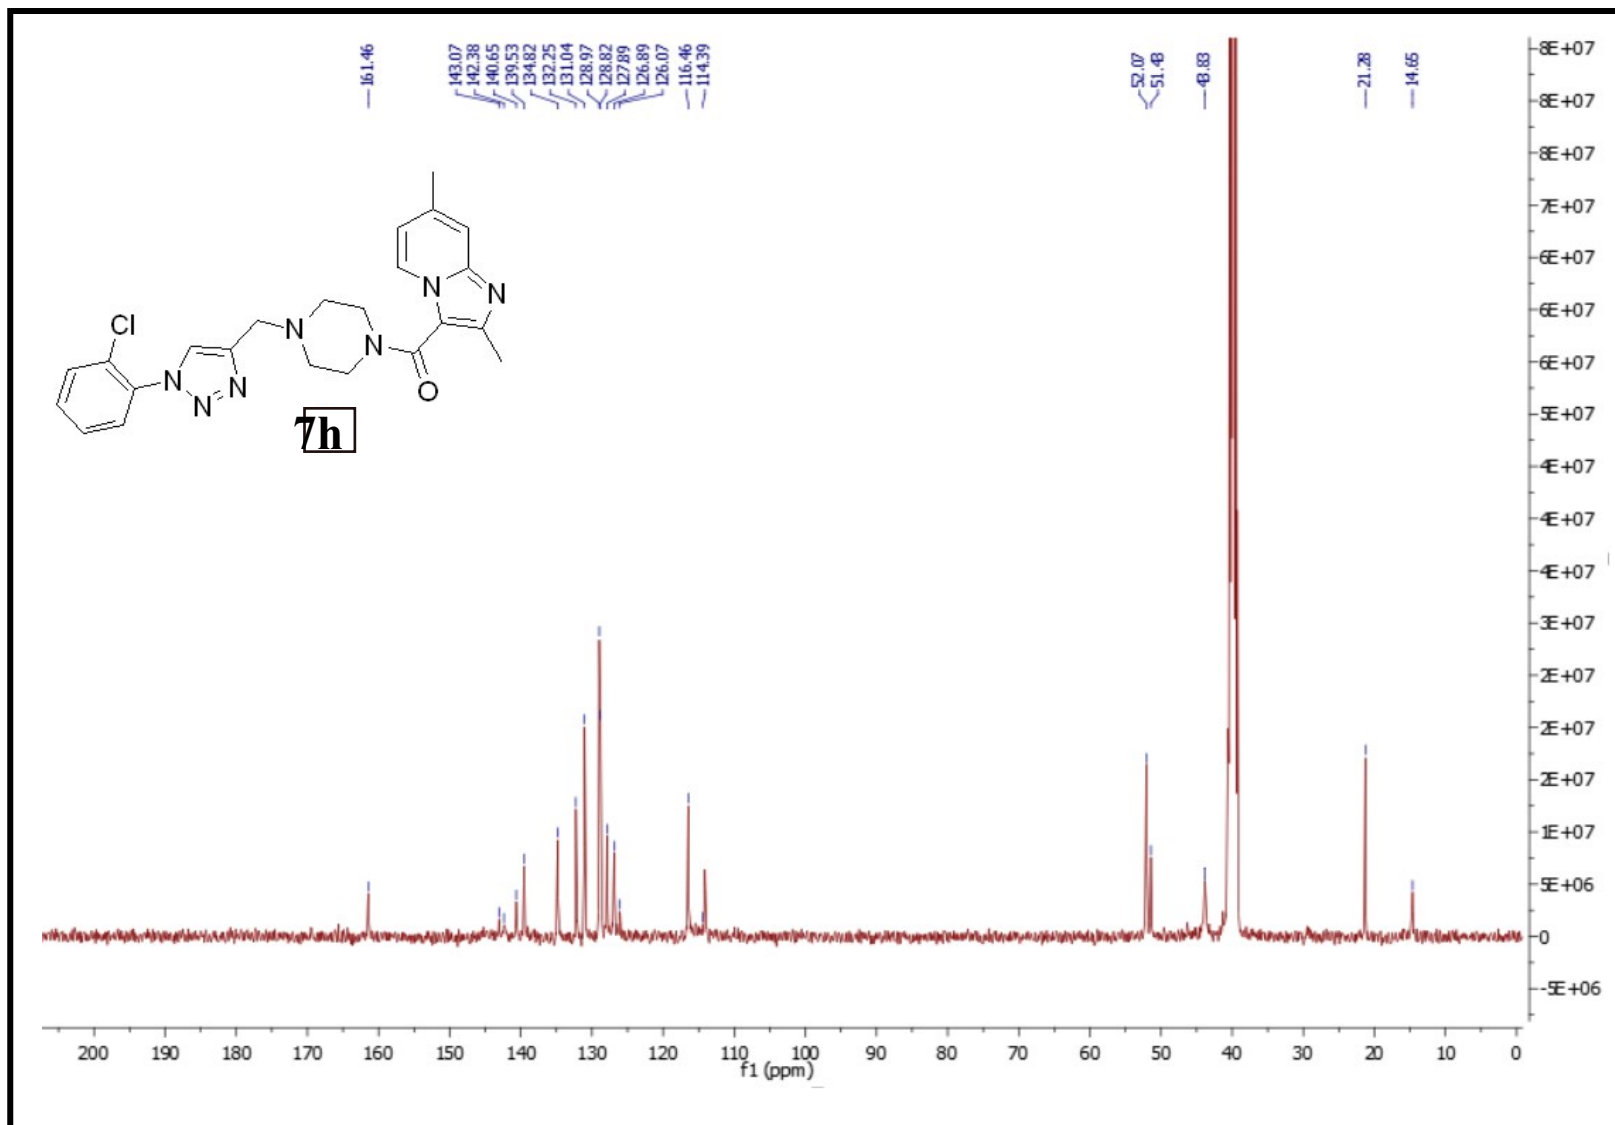

$^{13}\text{C}$ NMR of **7h**

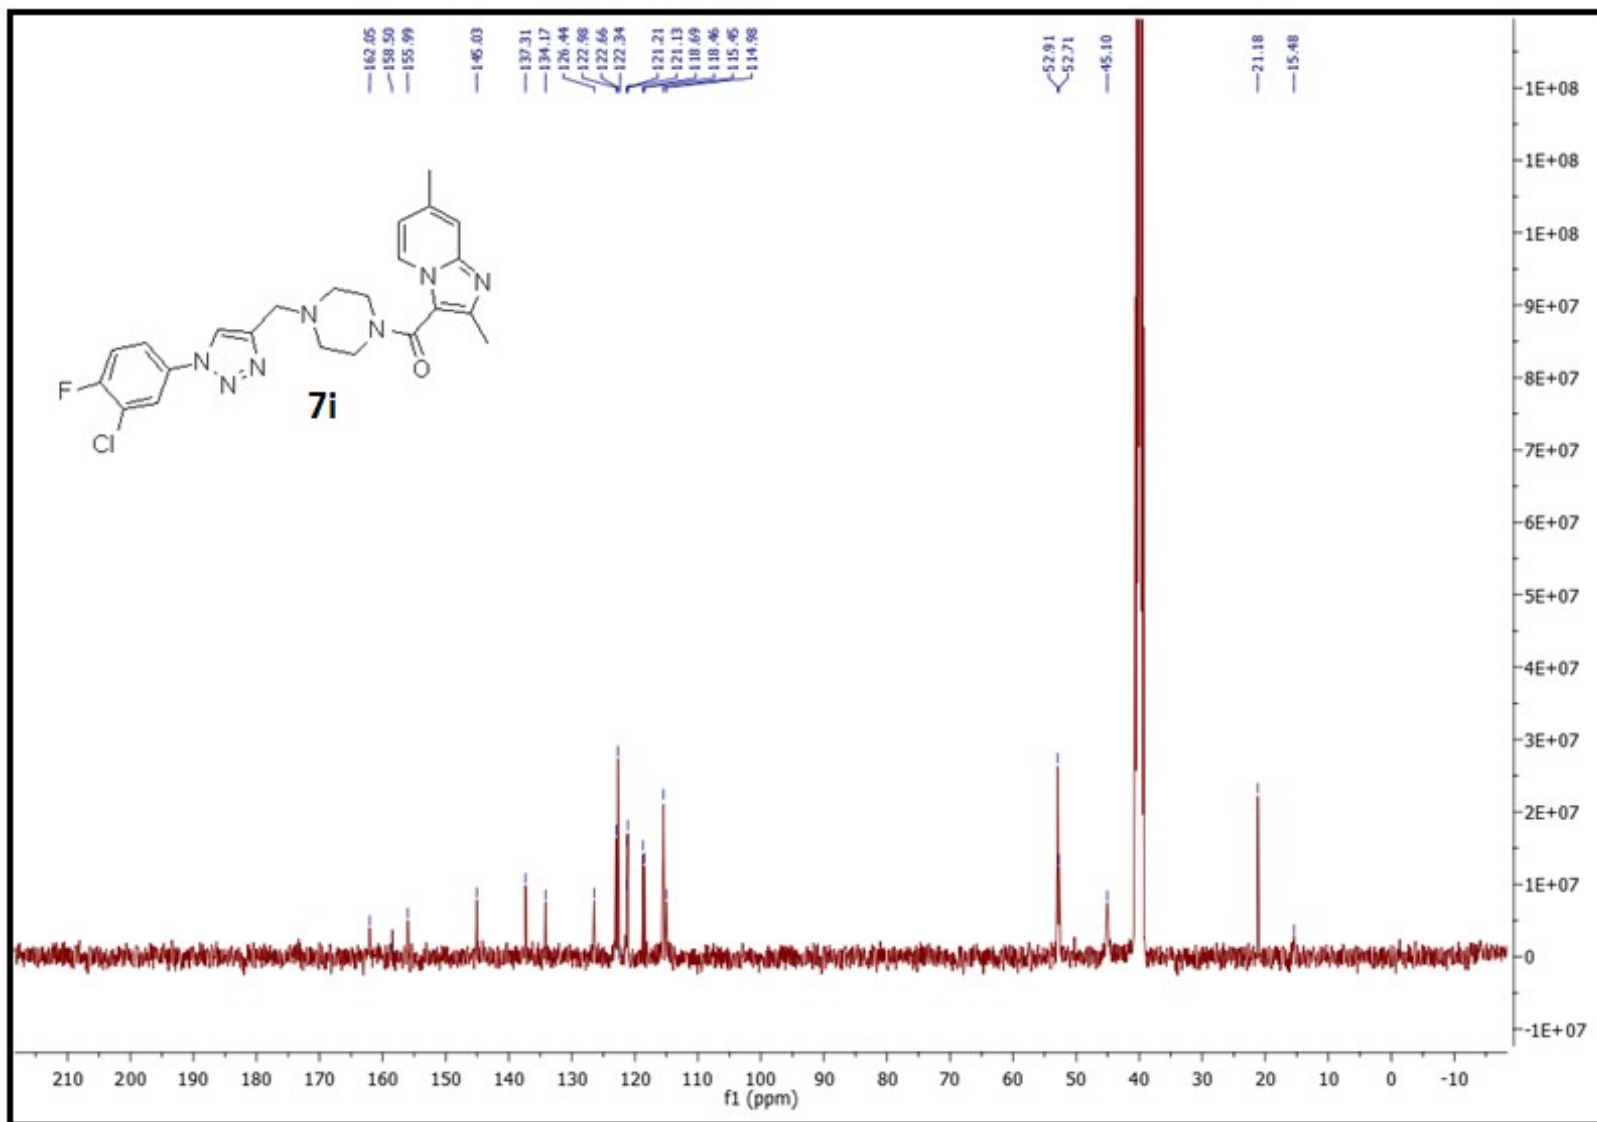

**<sup>13</sup>CNMR of 7i**

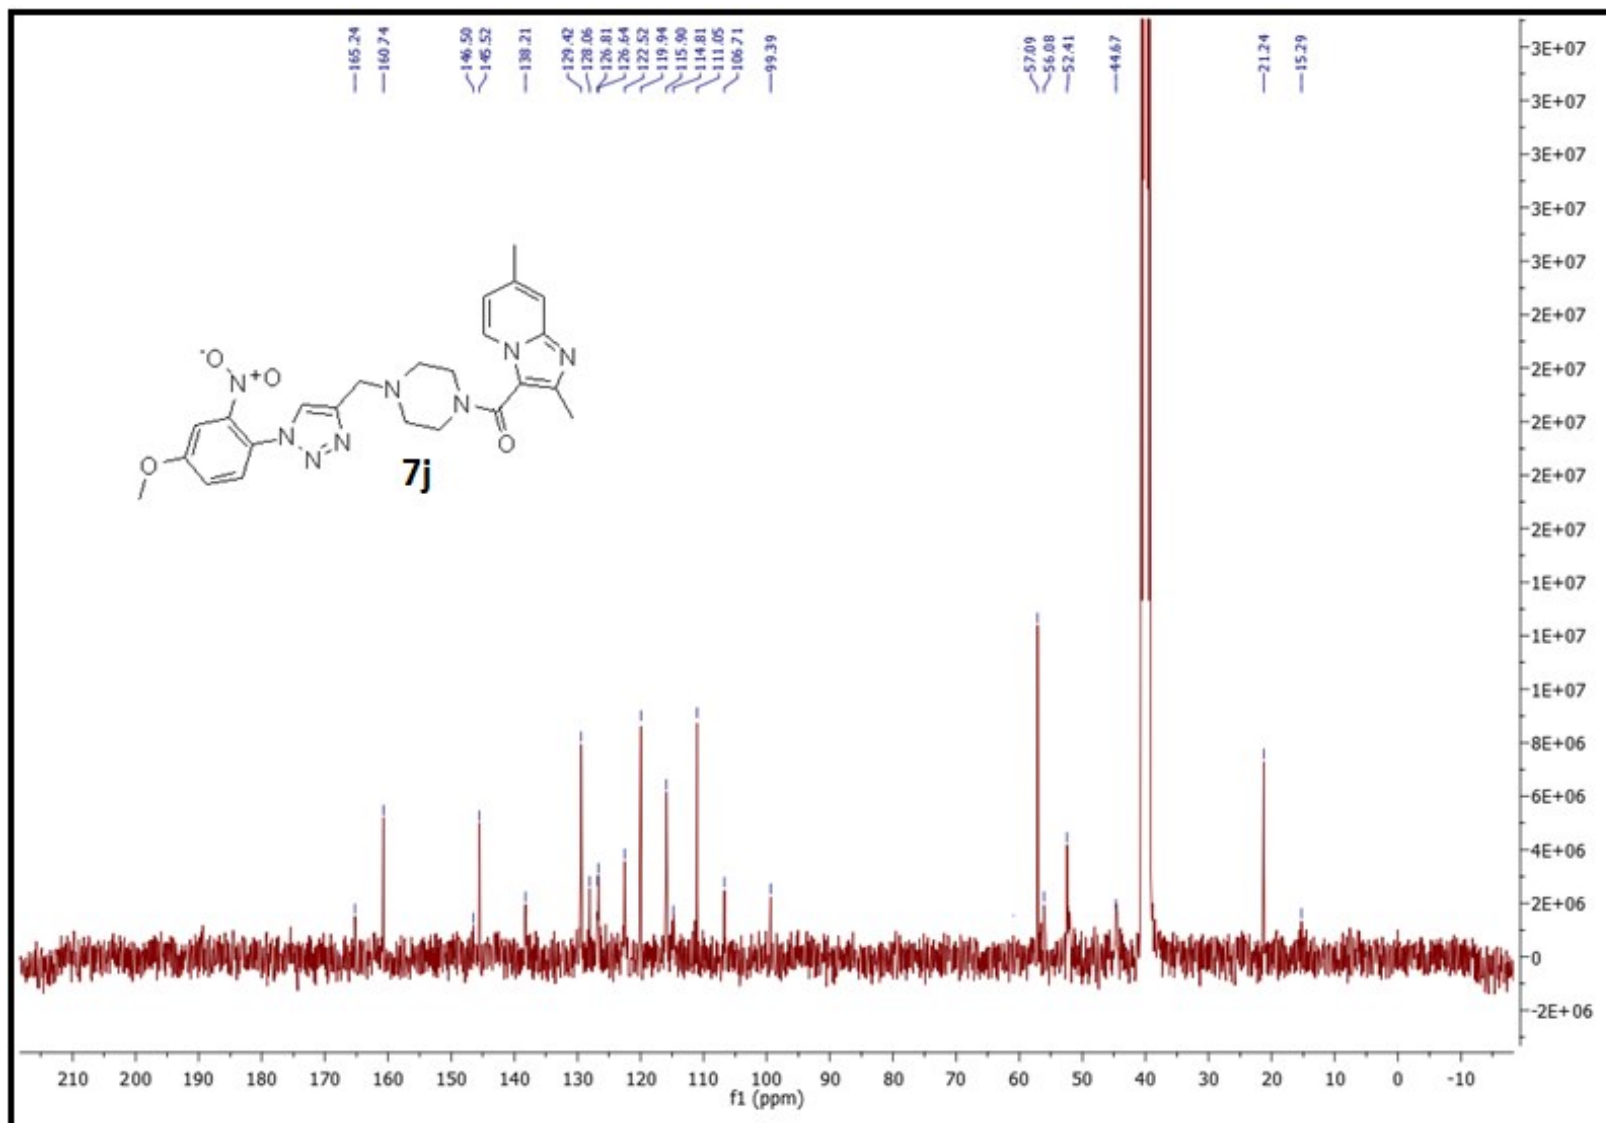

**<sup>13</sup>CNMR of 7j**

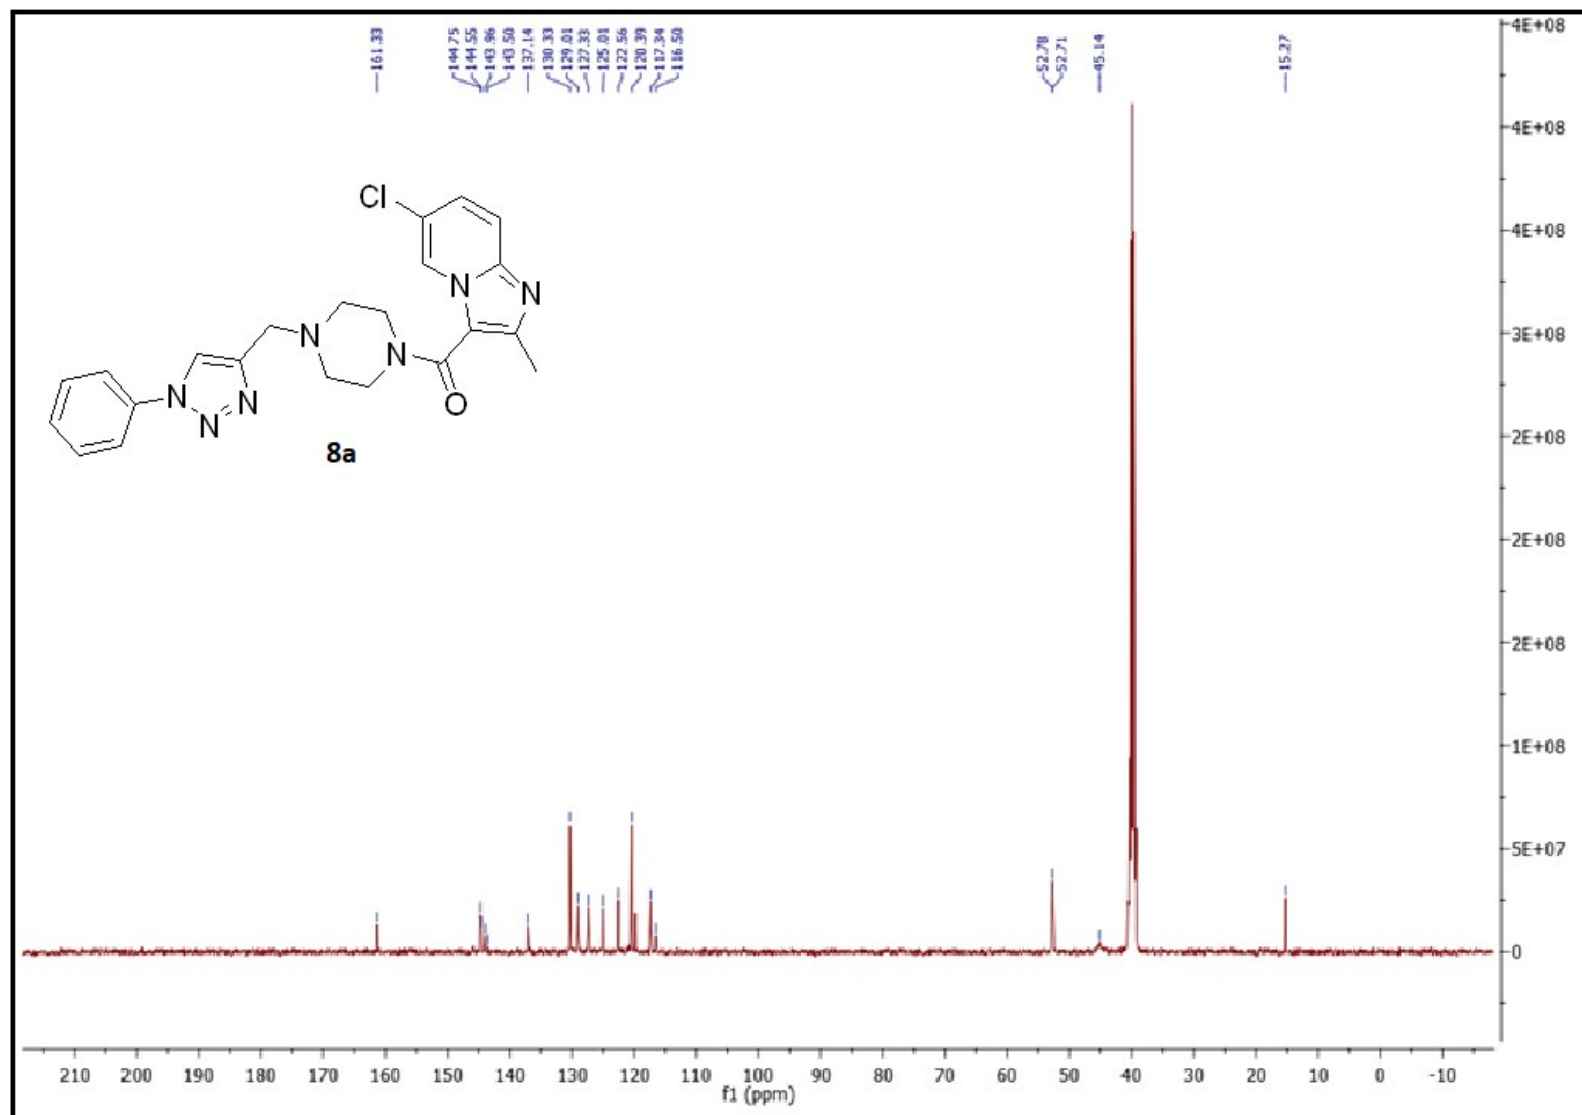

$^{13}\text{C}$ NMR of **8a**

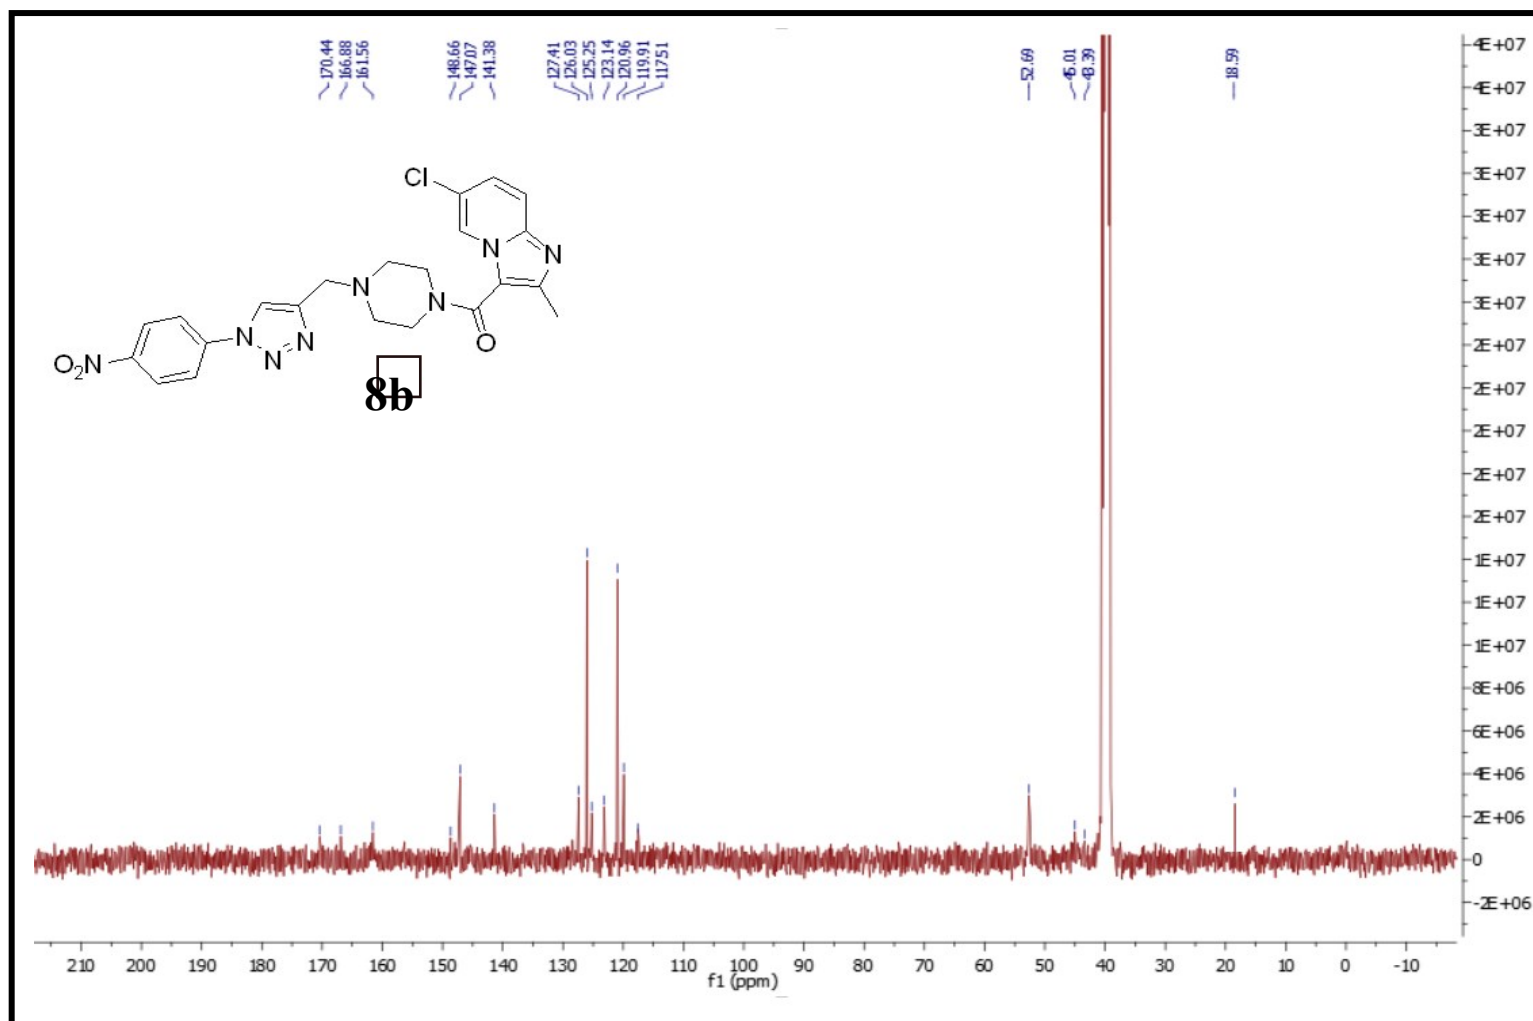

<sup>13</sup>CNMR of **8b**

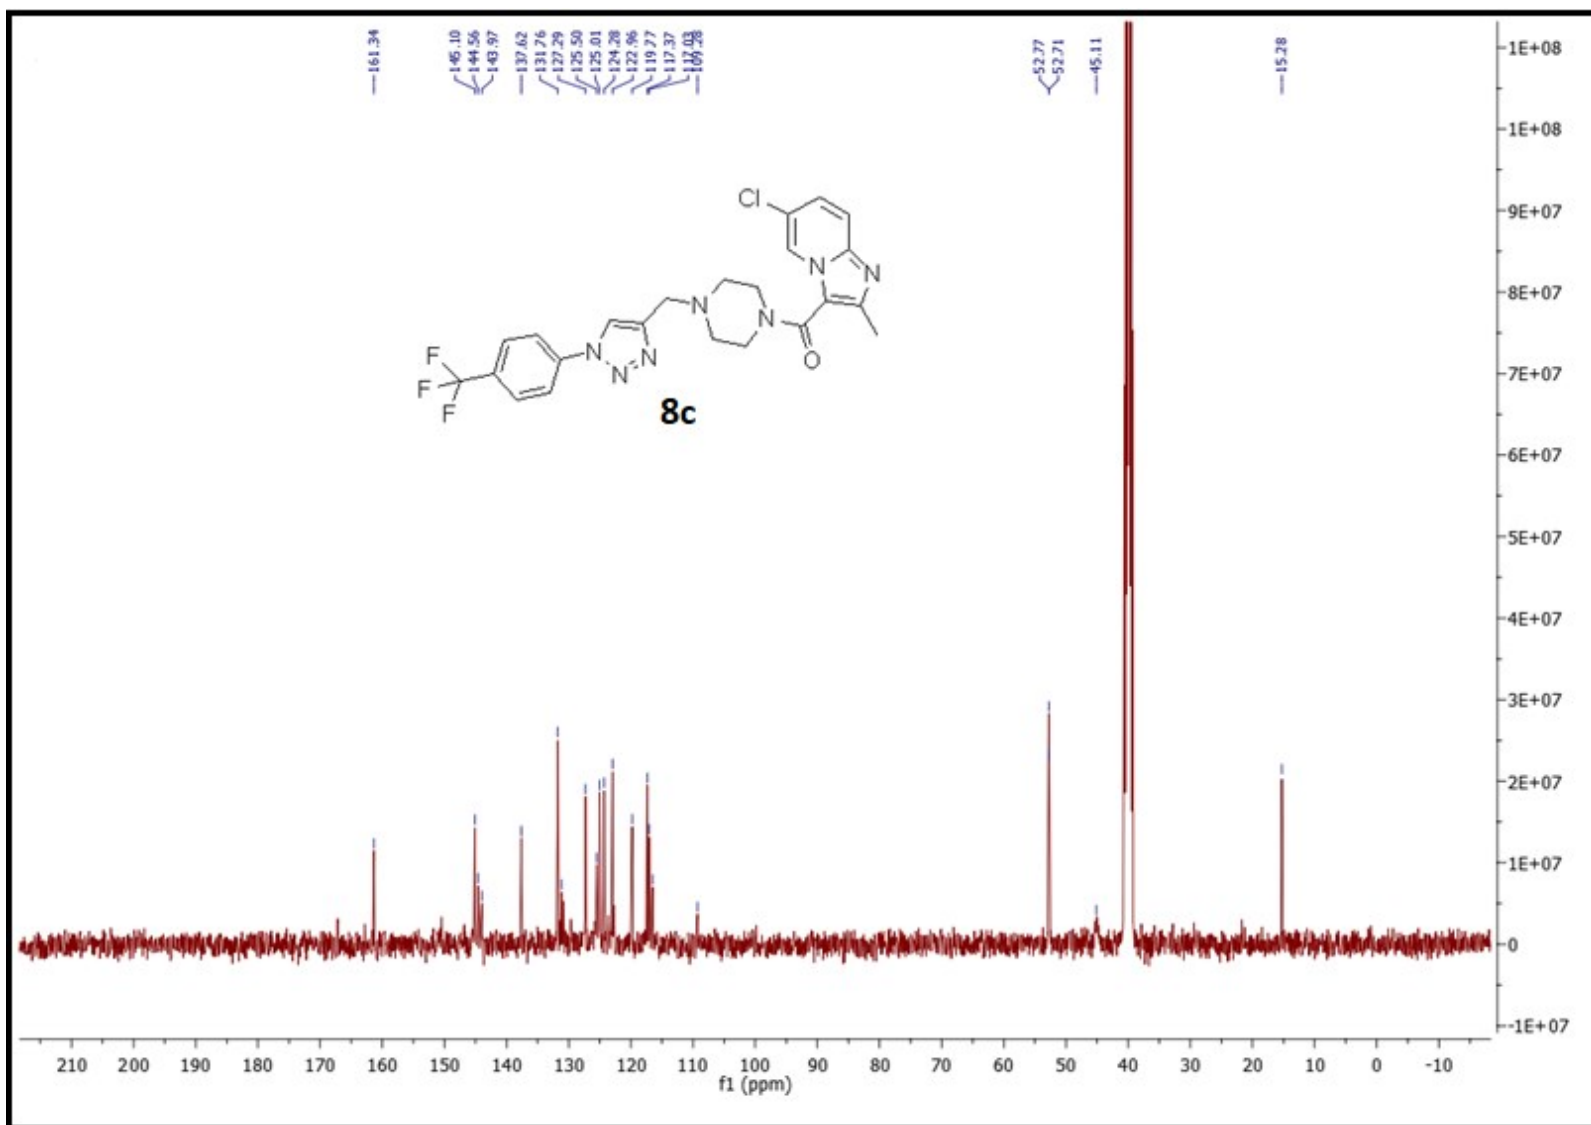

**<sup>13</sup>CNMR of 8c**



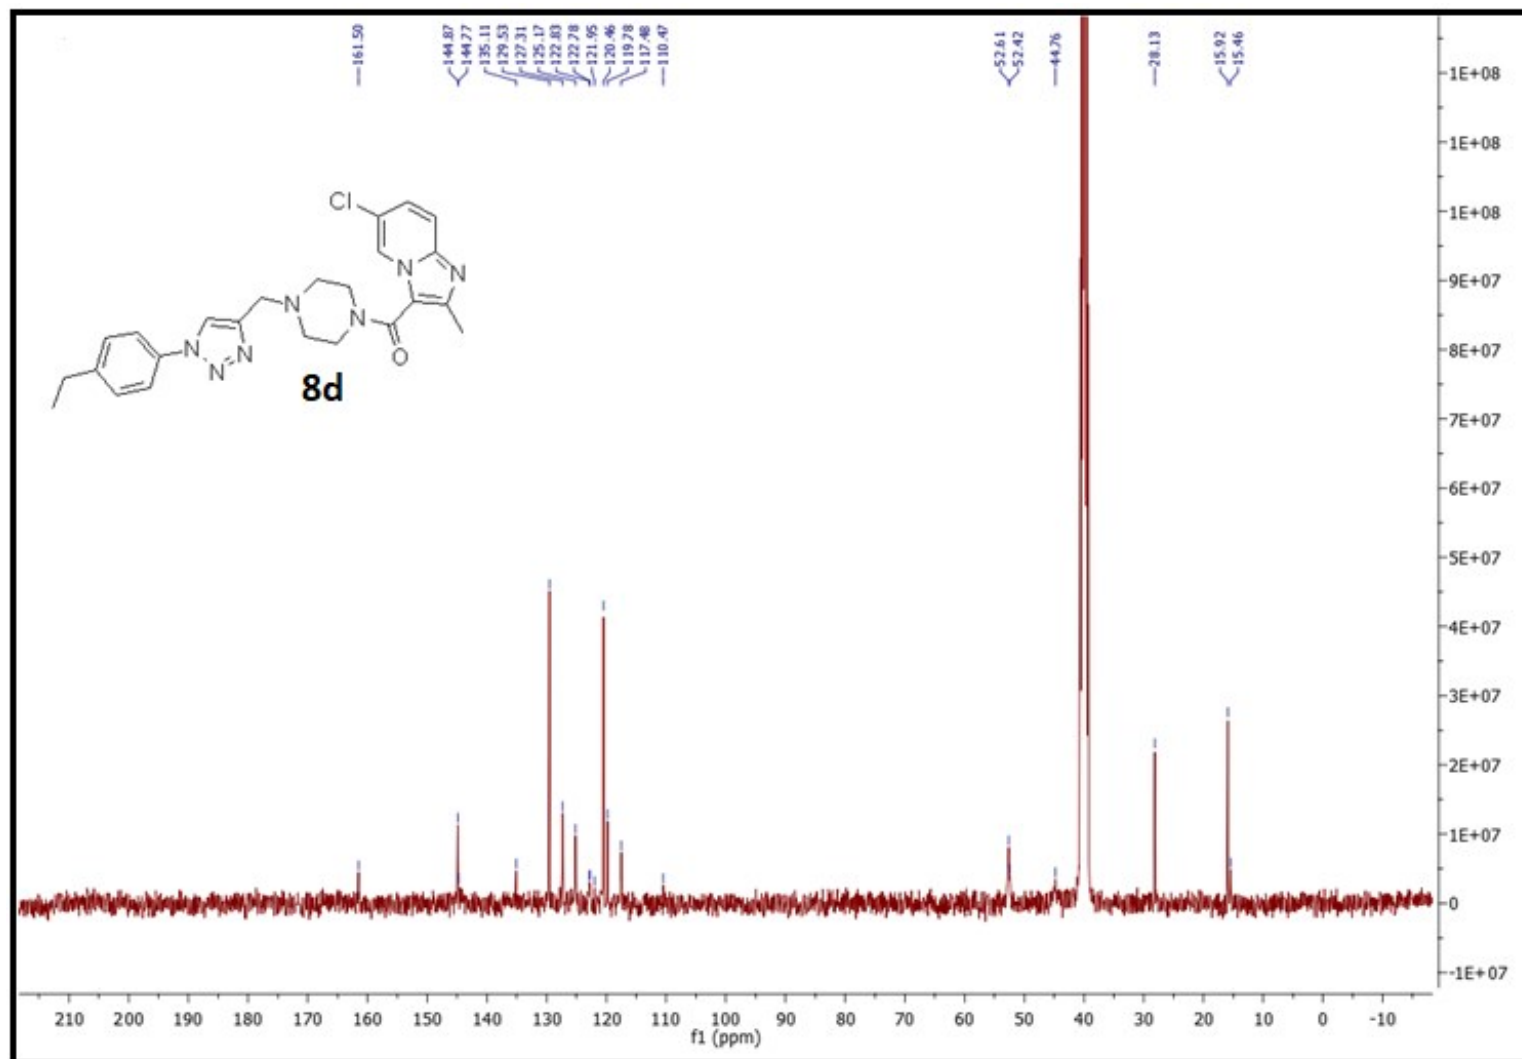

**<sup>13</sup>CNMR of 8d**

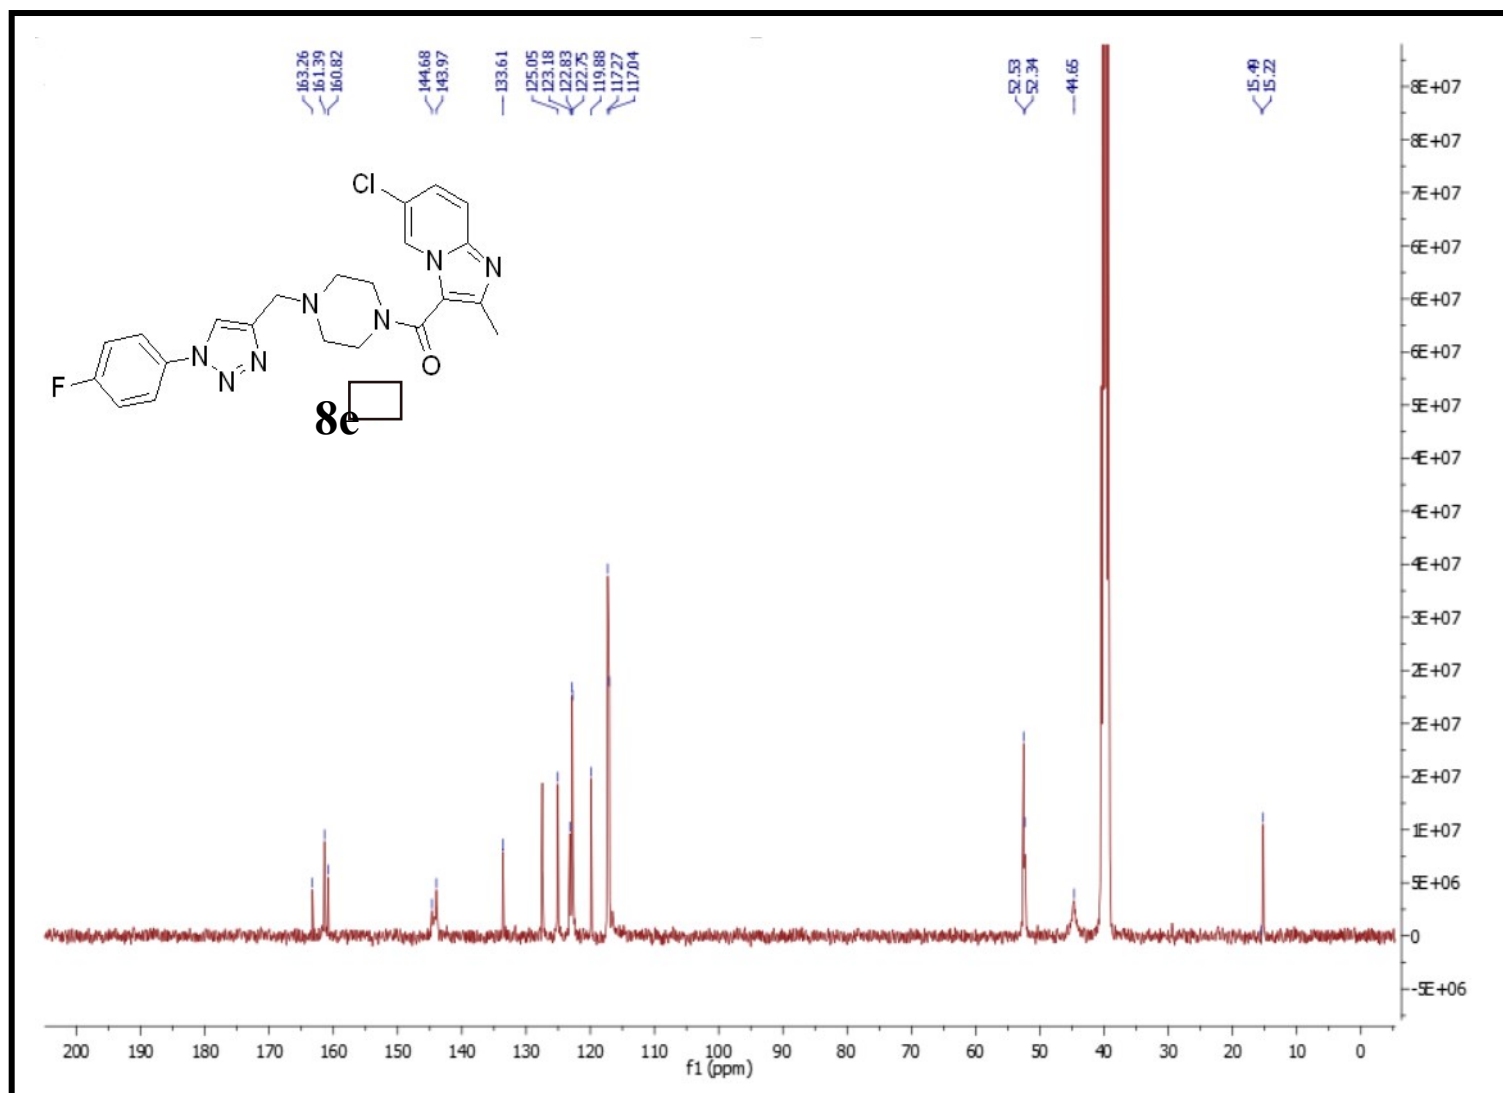

<sup>13</sup>CNMR of **8e**

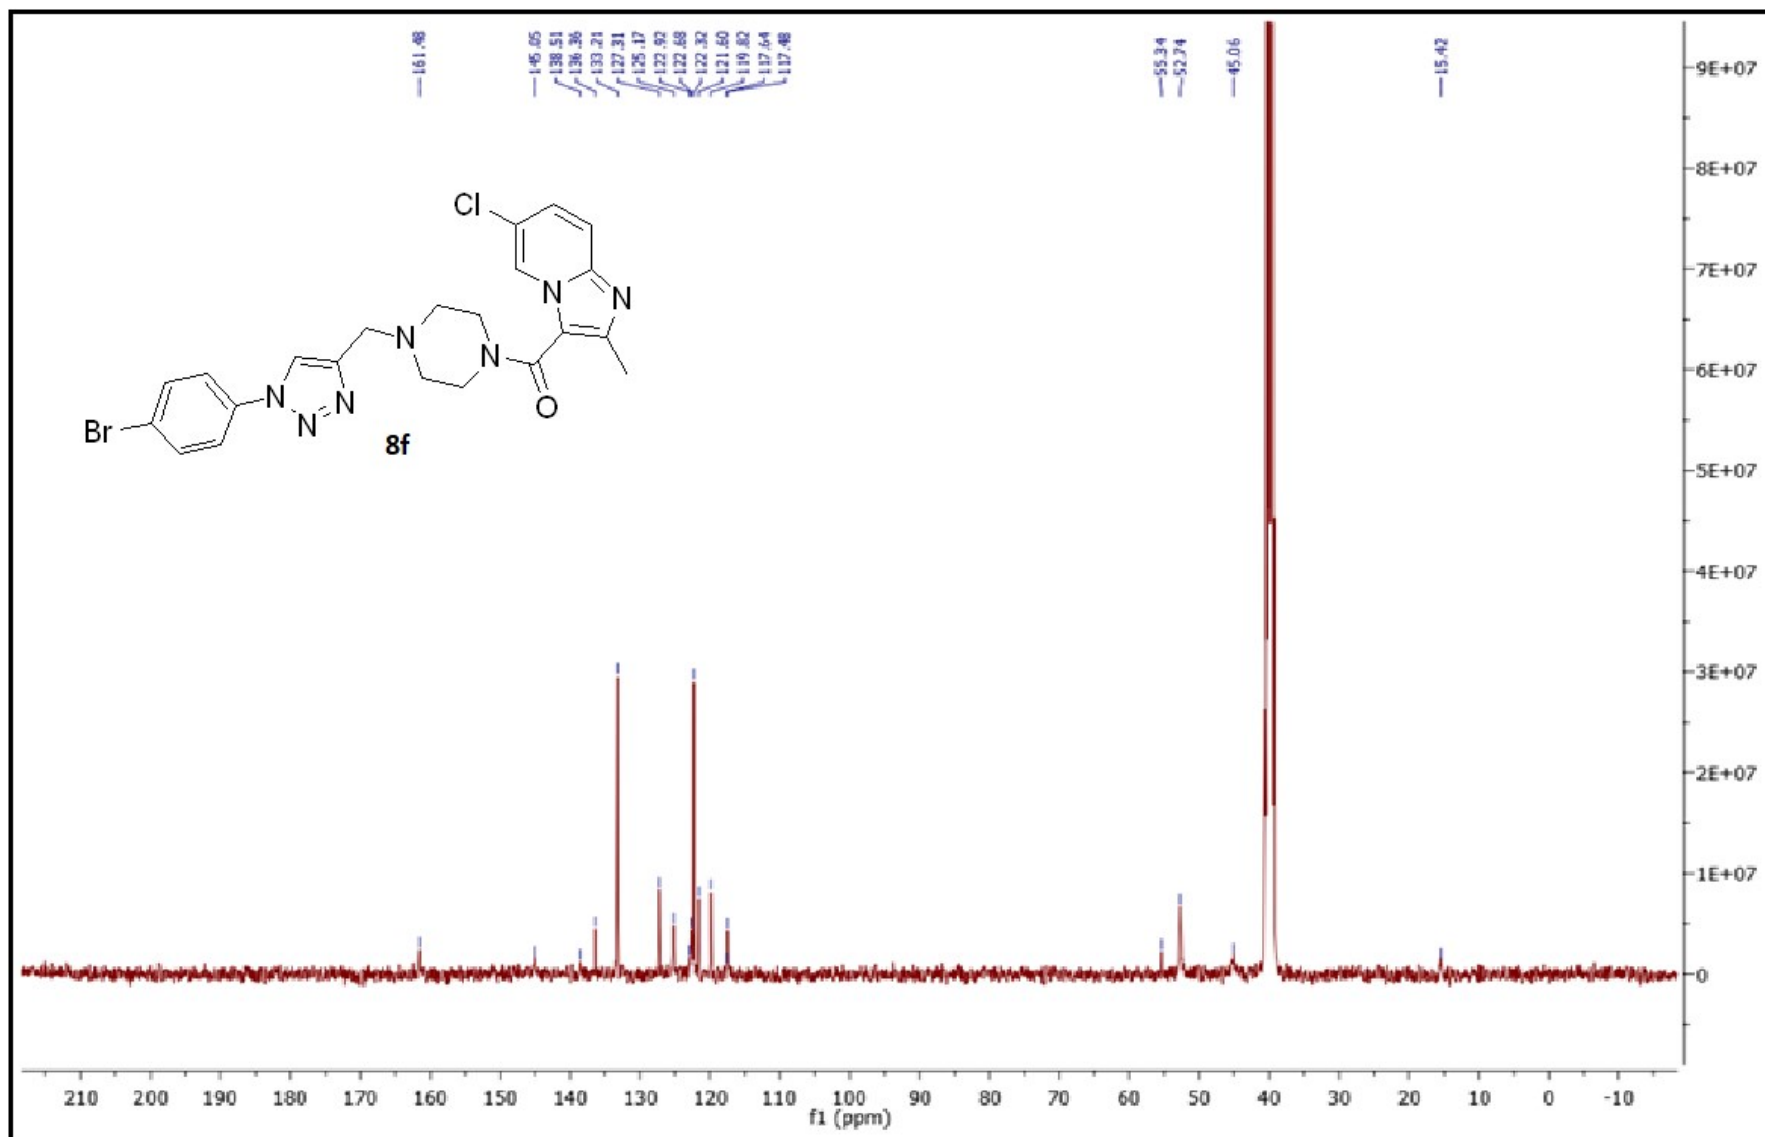

$^{13}\text{C}$ NMR of **8f**

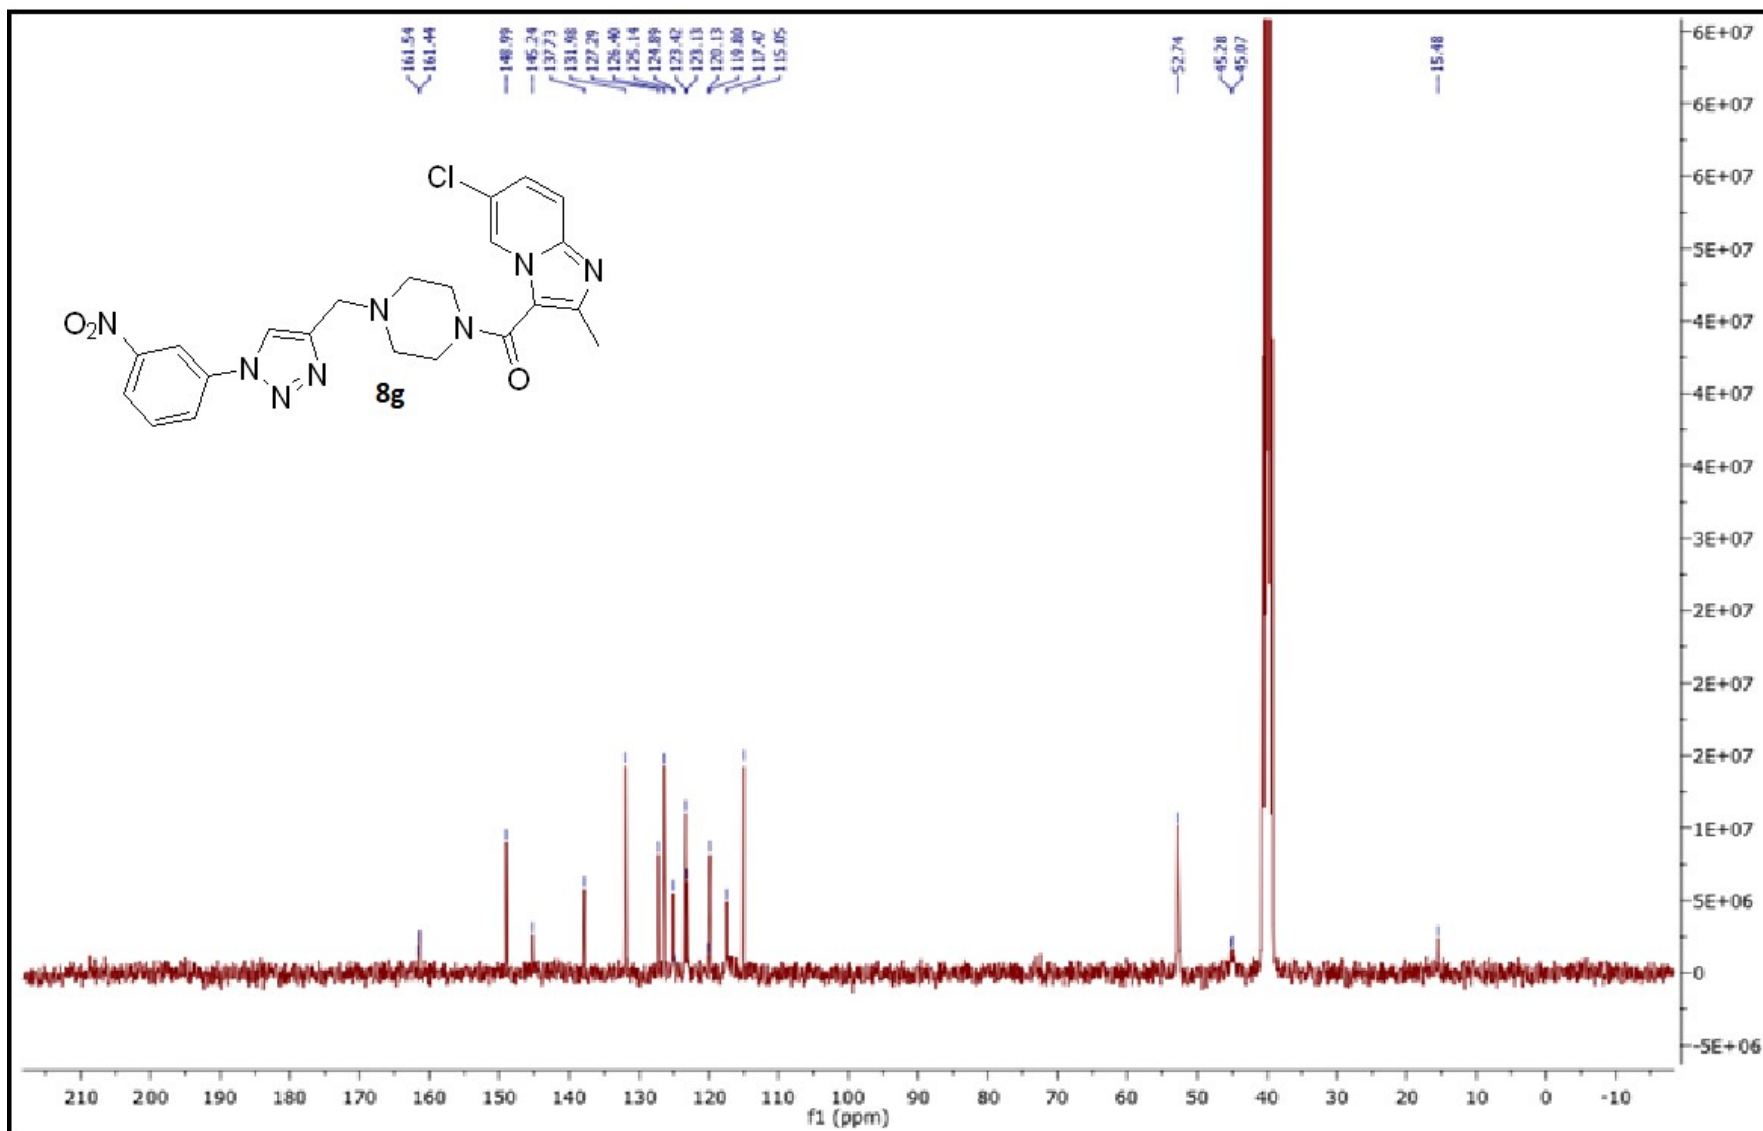

$^{13}\text{C}$ NMR of **8g**

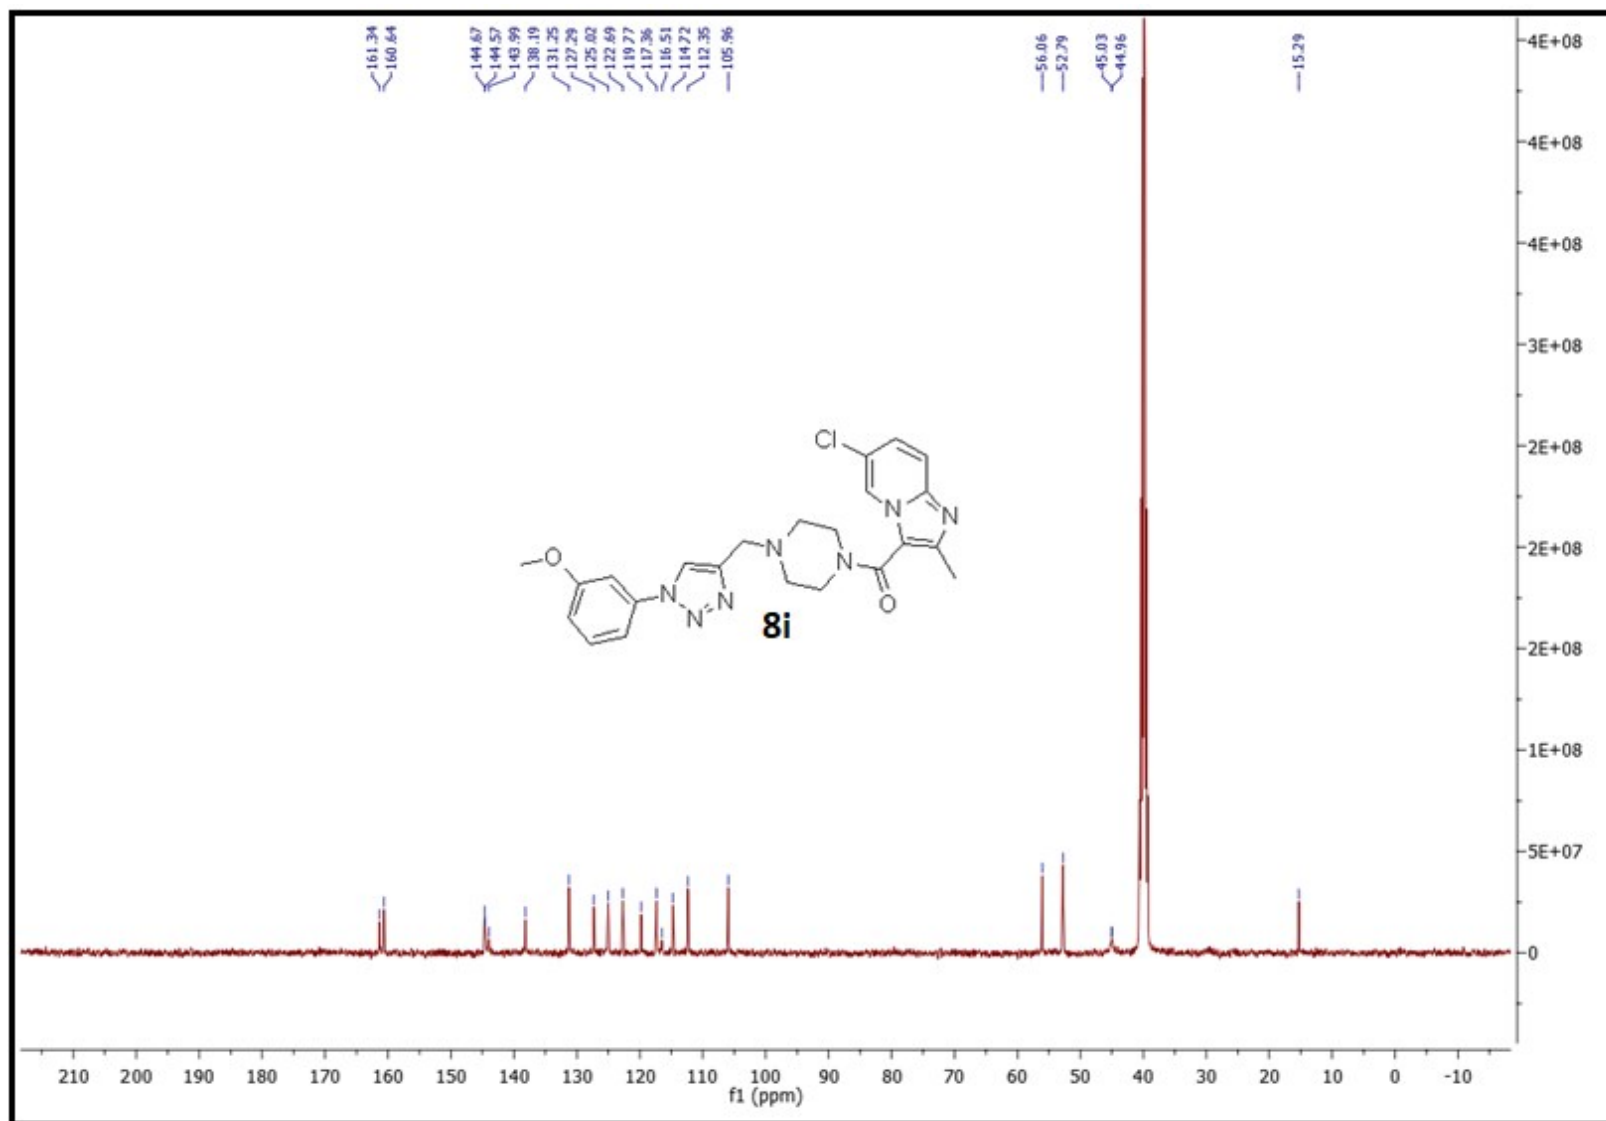

<sup>13</sup>CNMR of 8i

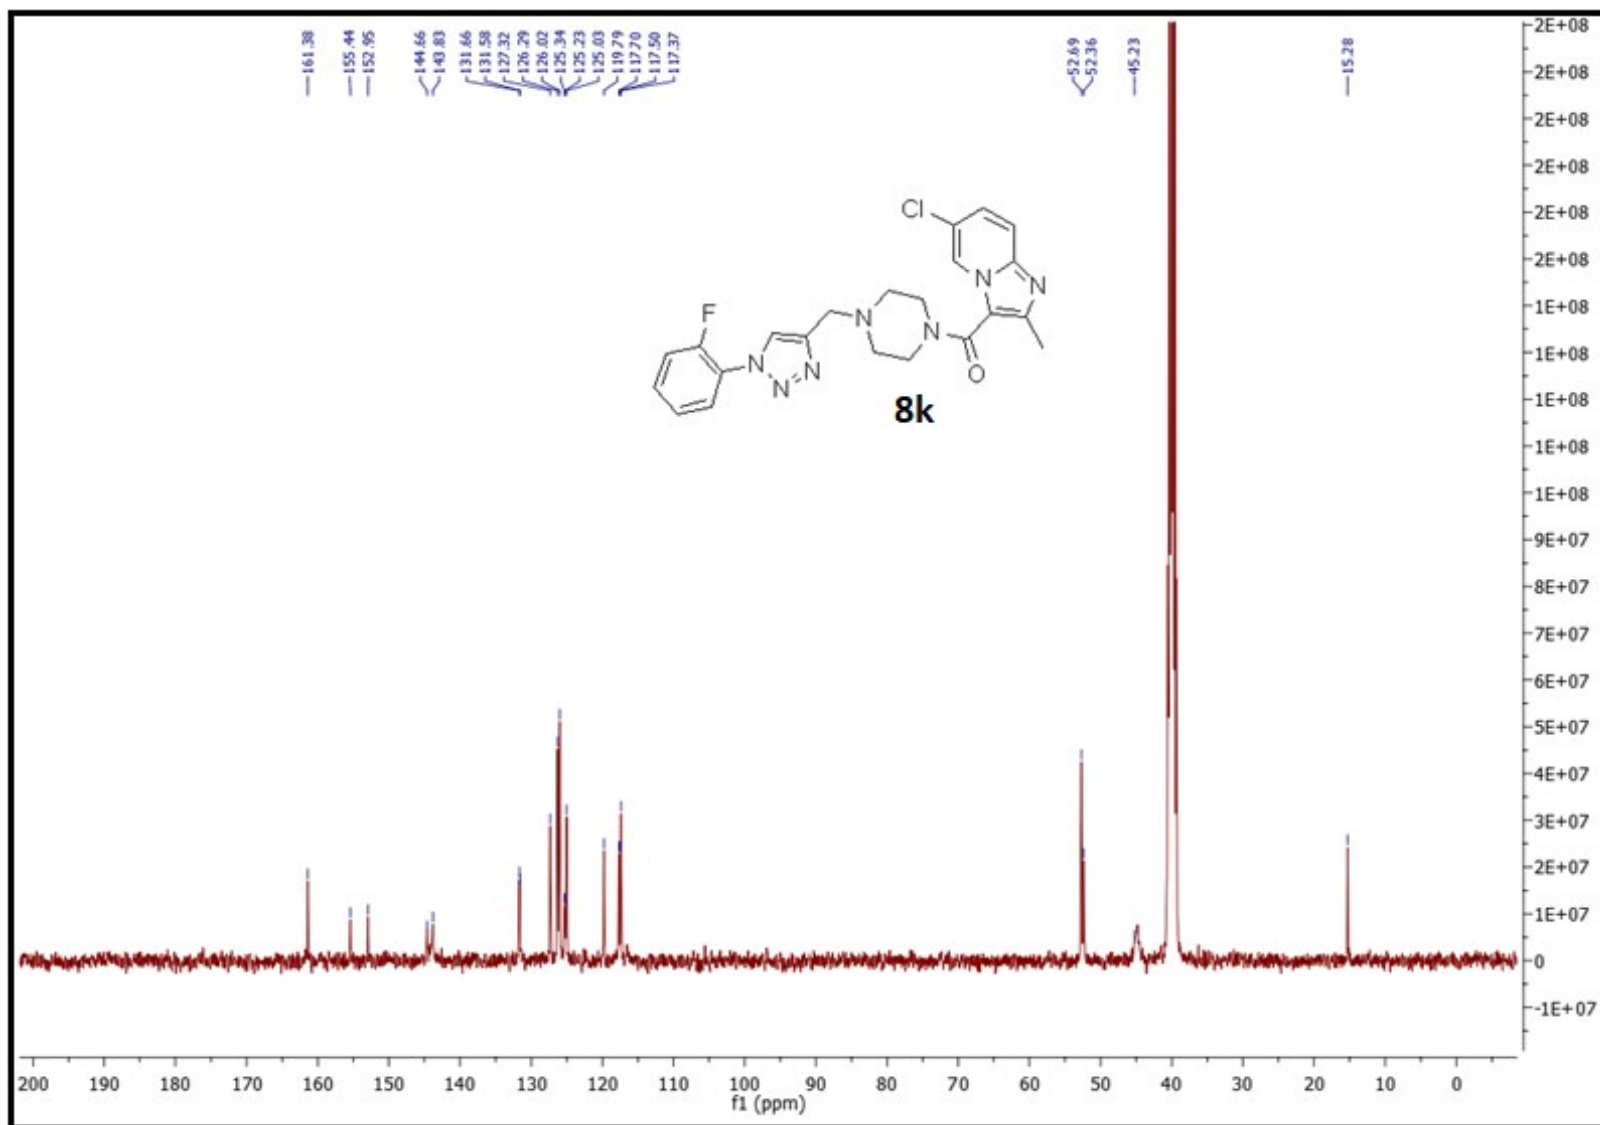

$^{13}\text{C}$ NMR of **8k**

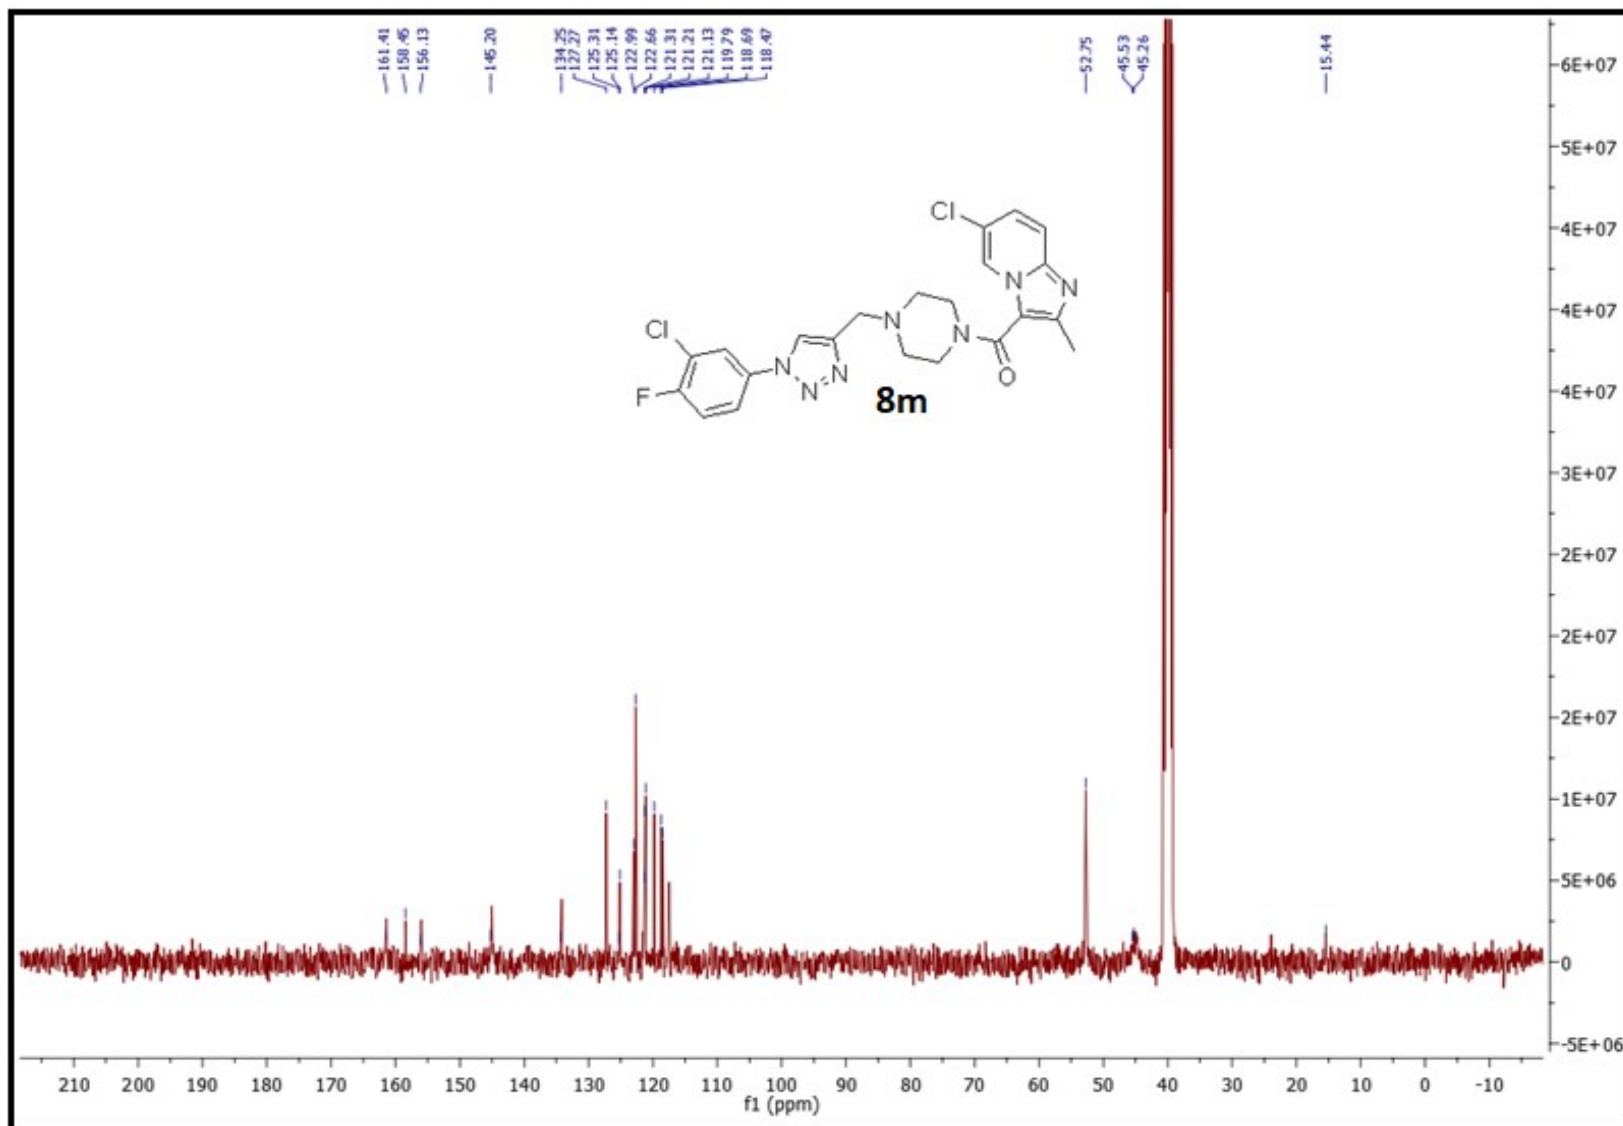

$^{13}\text{C}$ NMR of **8m**

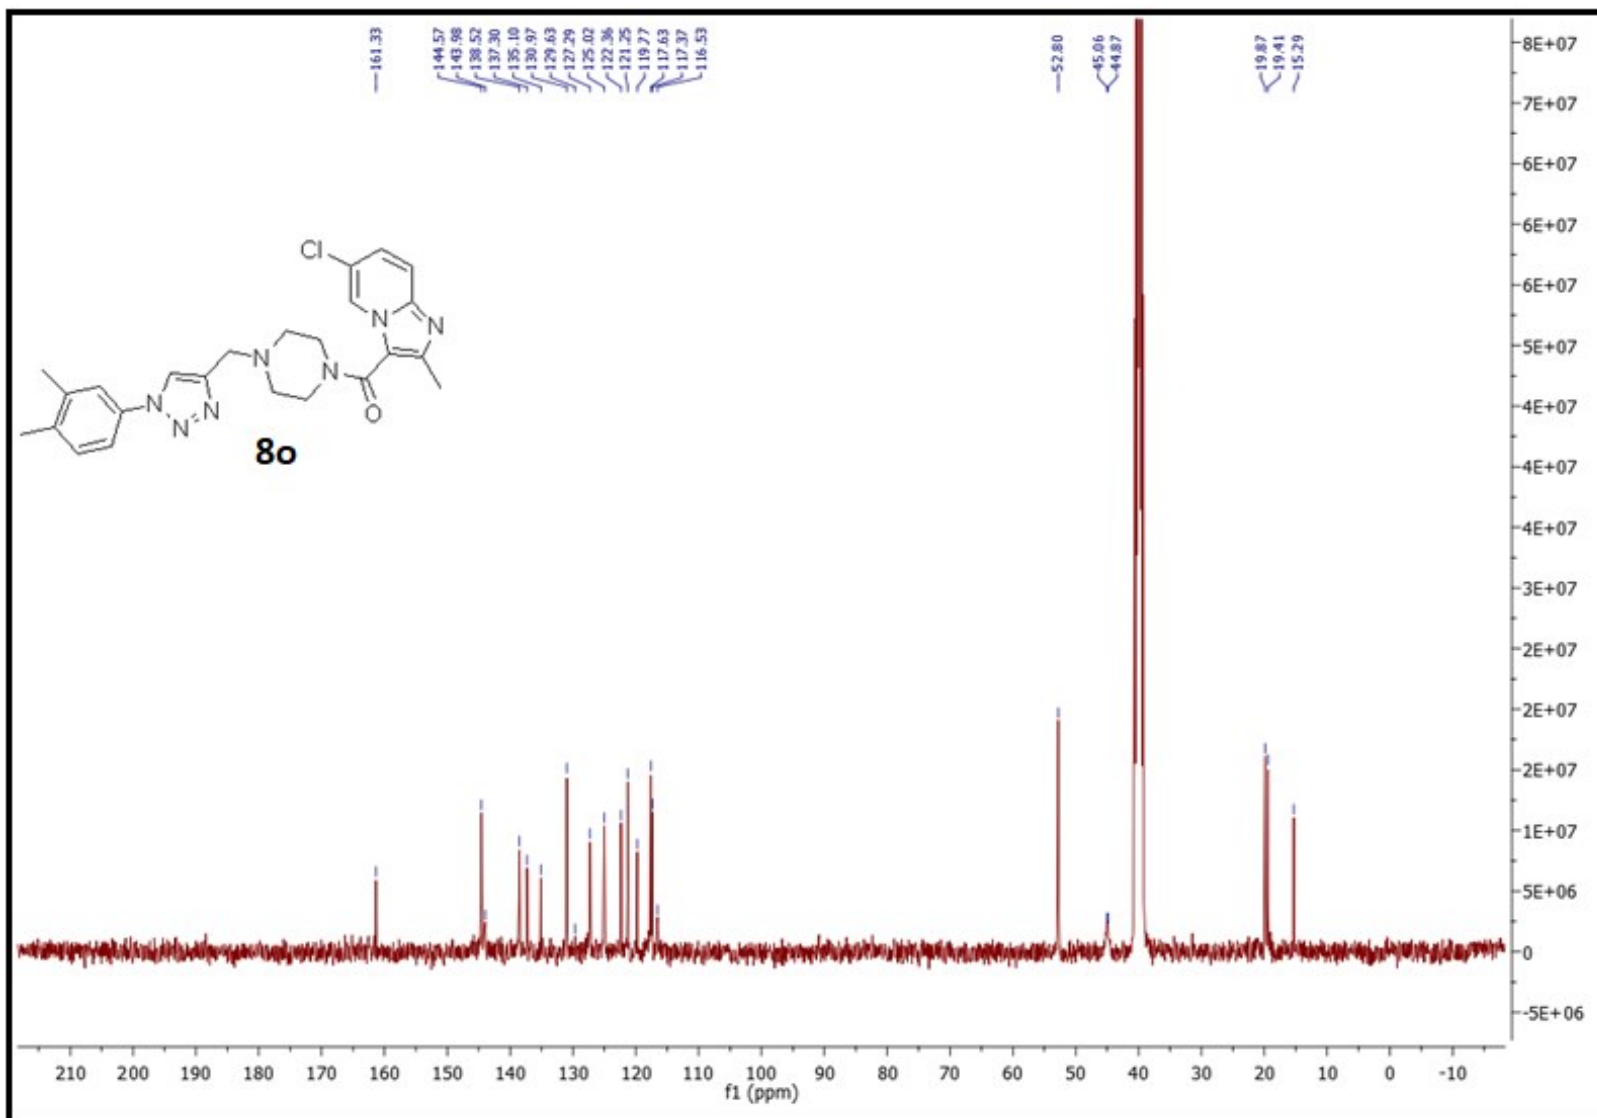

$^{13}\text{C}$ NMR of **8o**



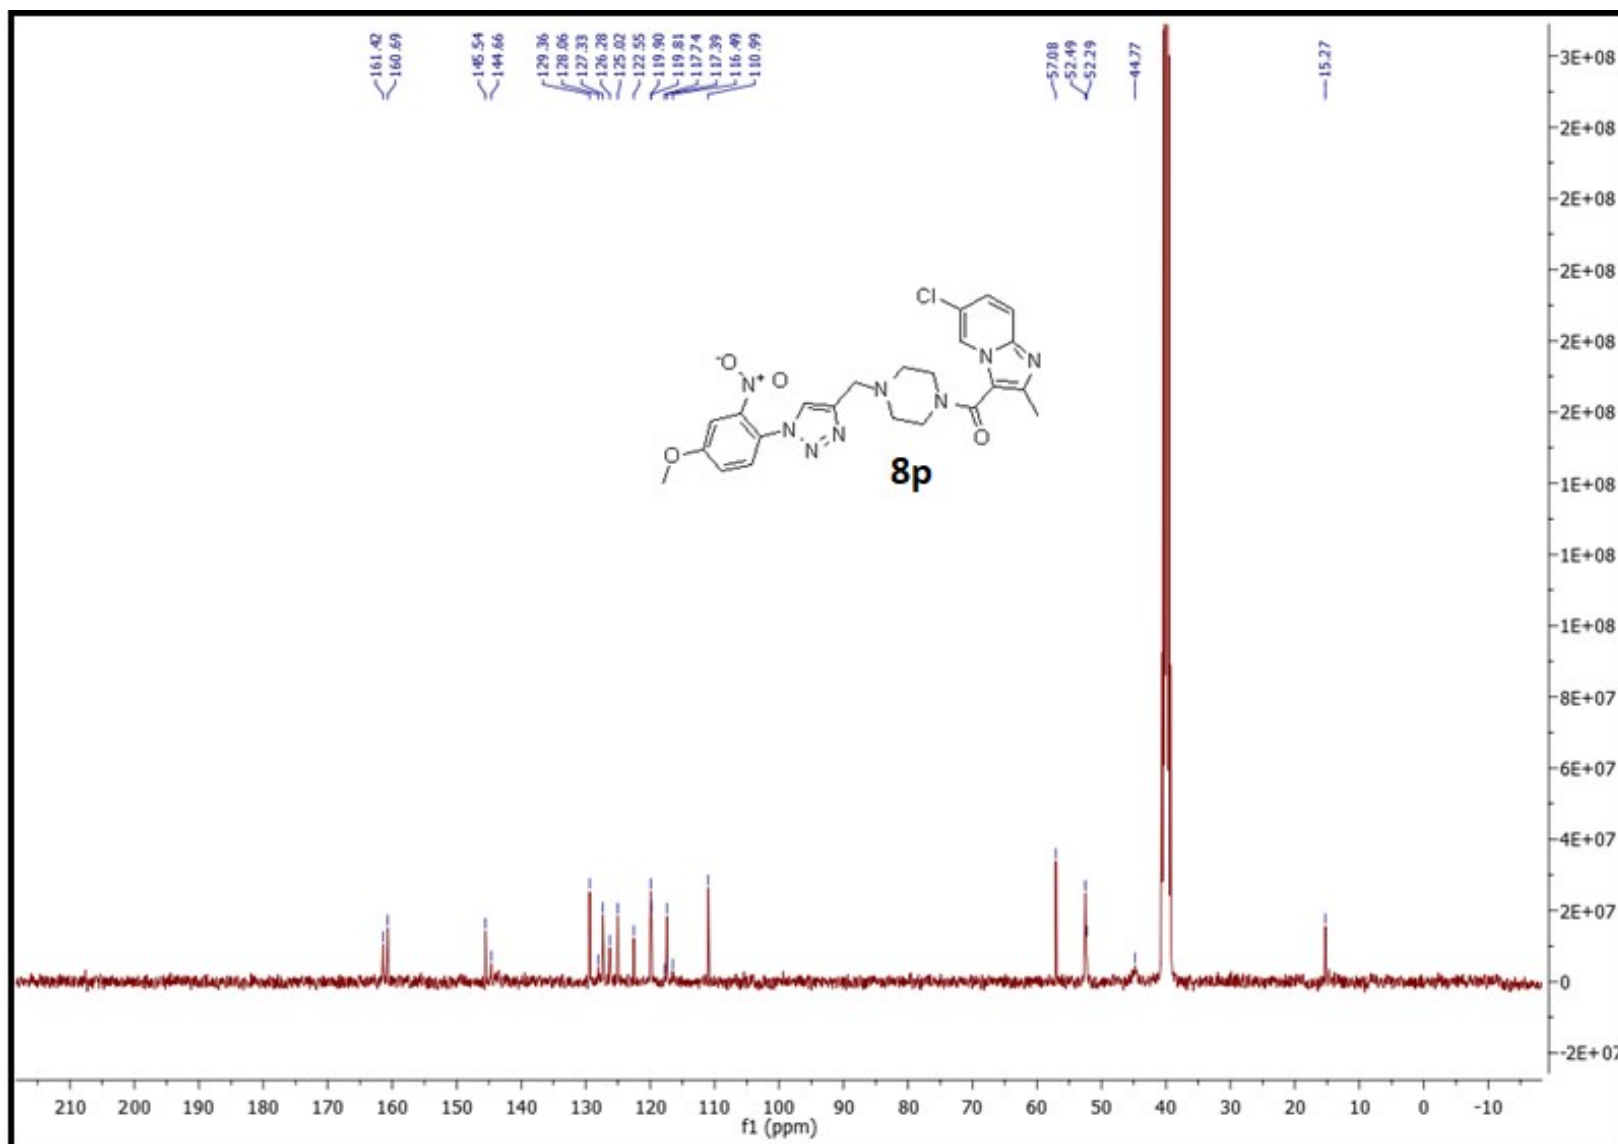

**<sup>13</sup>CNMR of 8p**

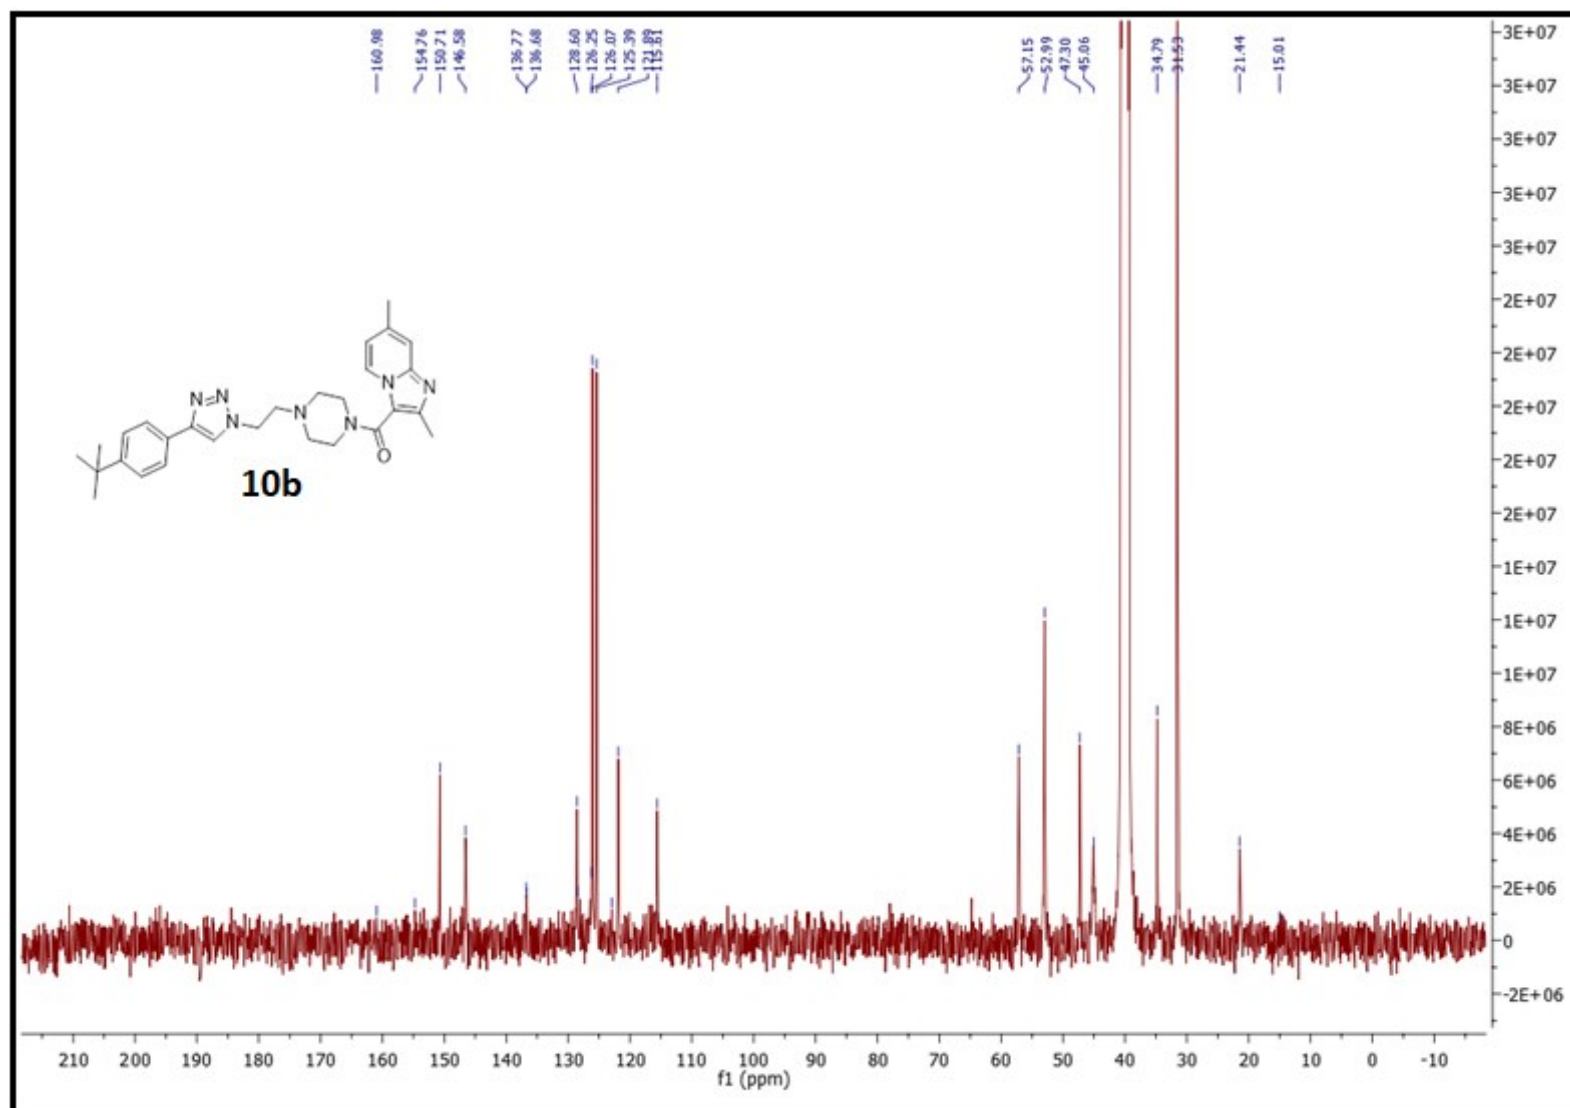

**<sup>13</sup>CNMR of 10b**

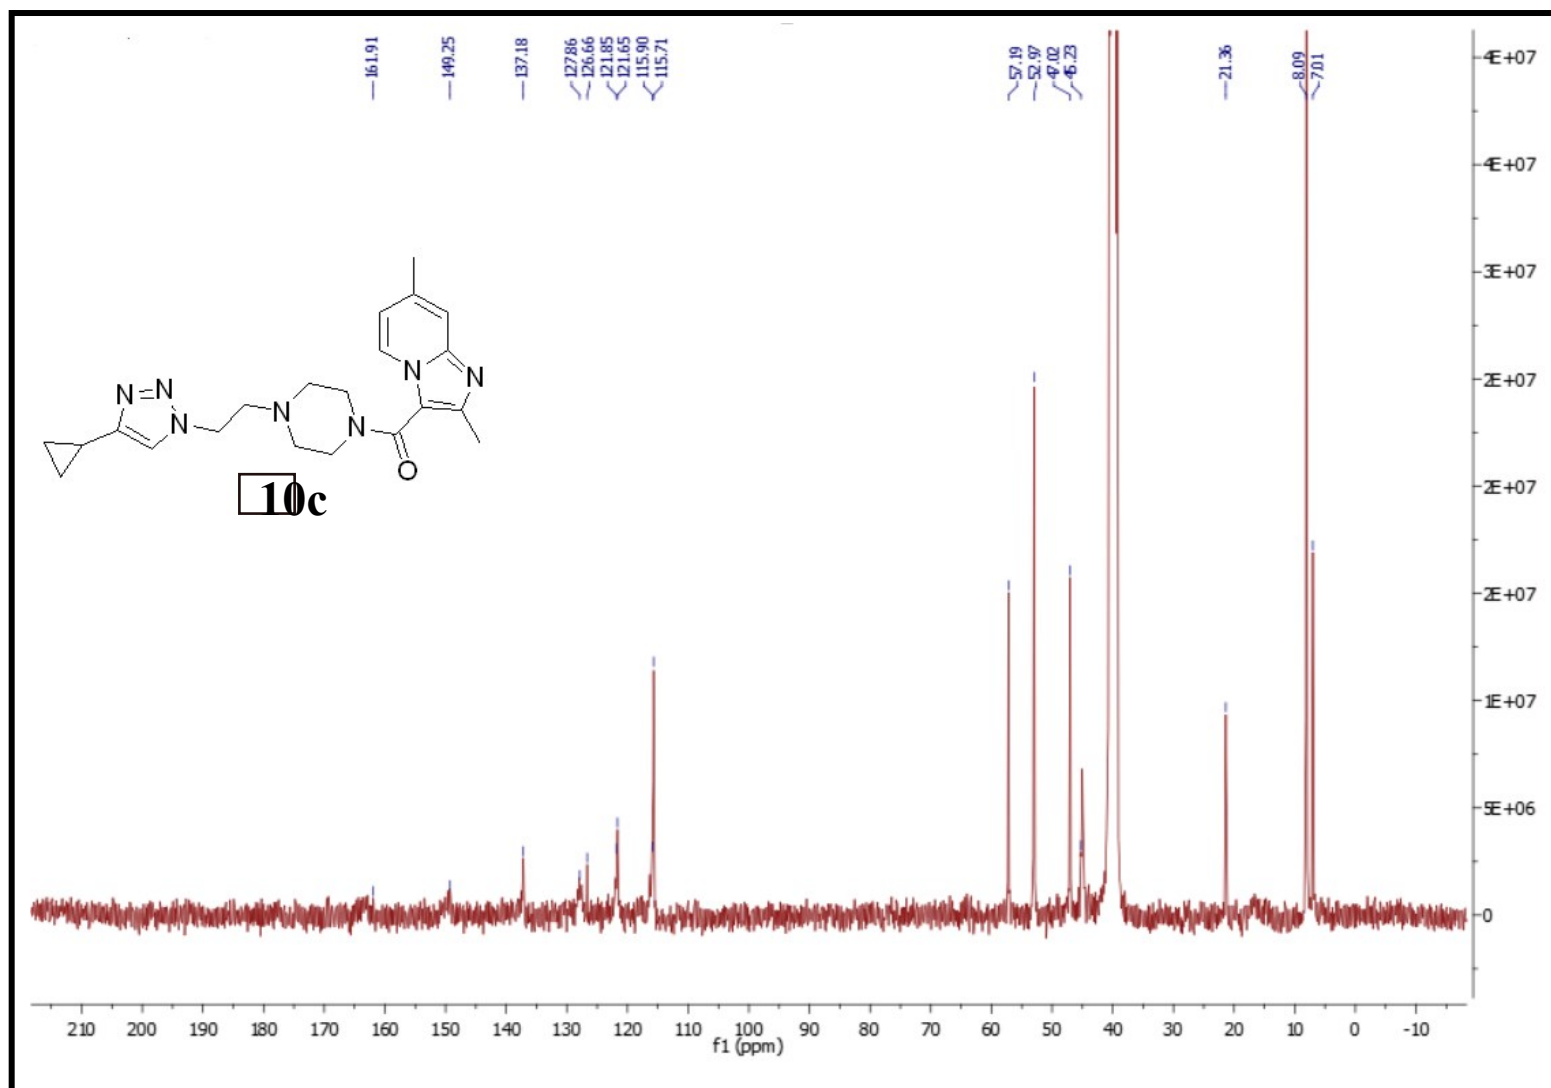

$^{13}\text{C}$ NMR of **10c**

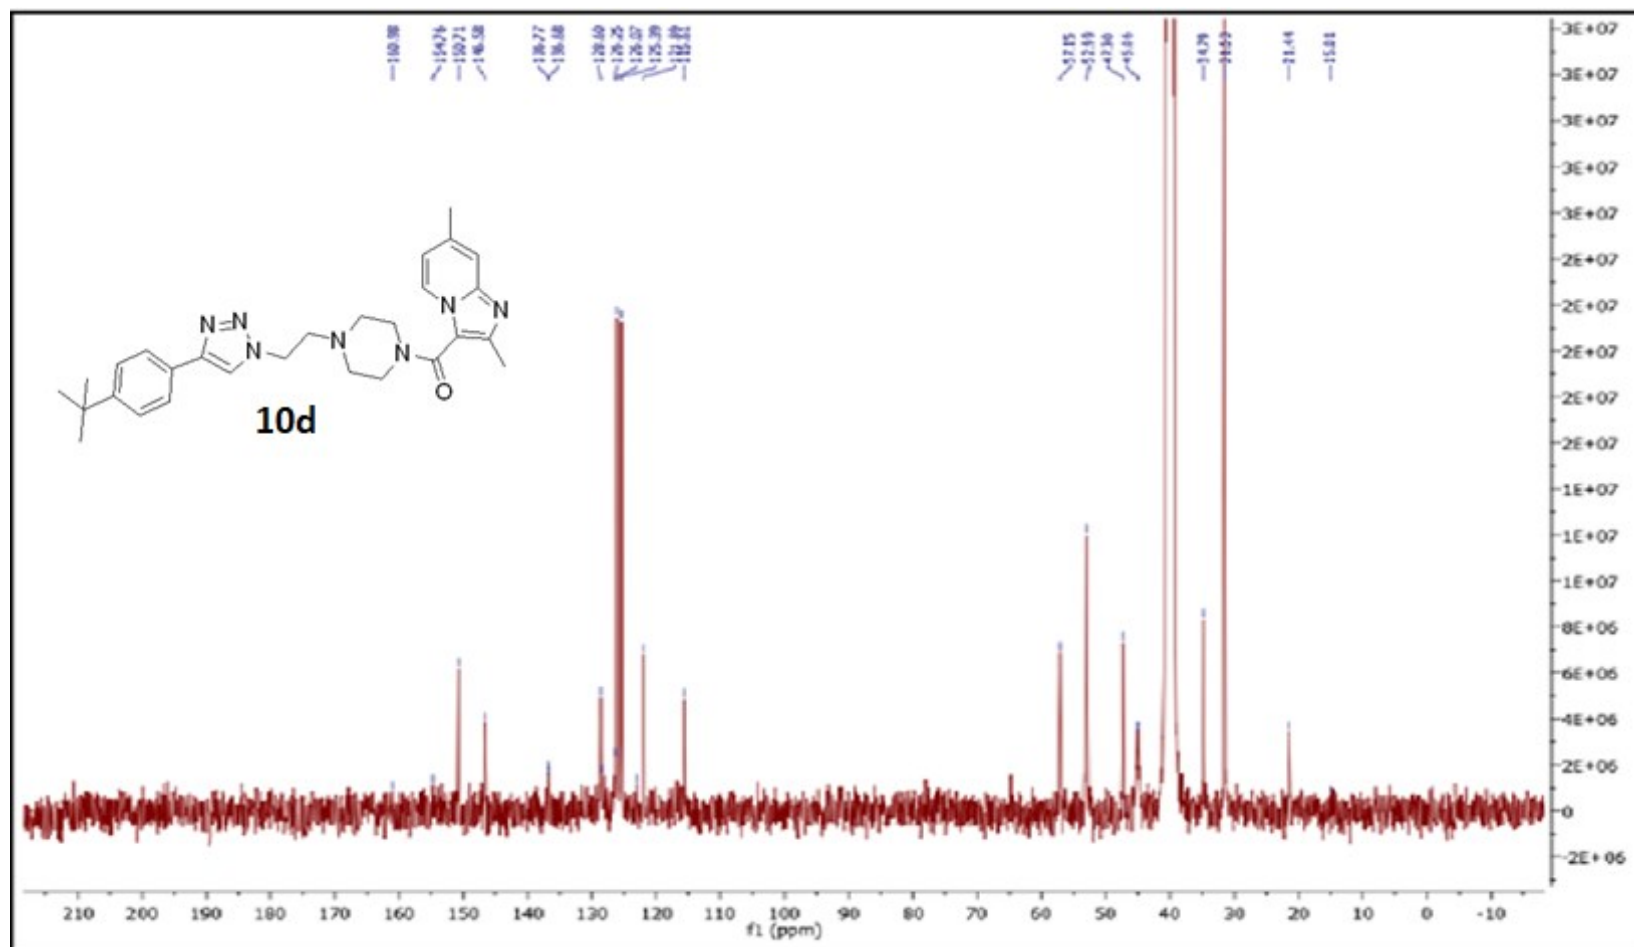

$^{13}\text{C}$ NMR of 10d

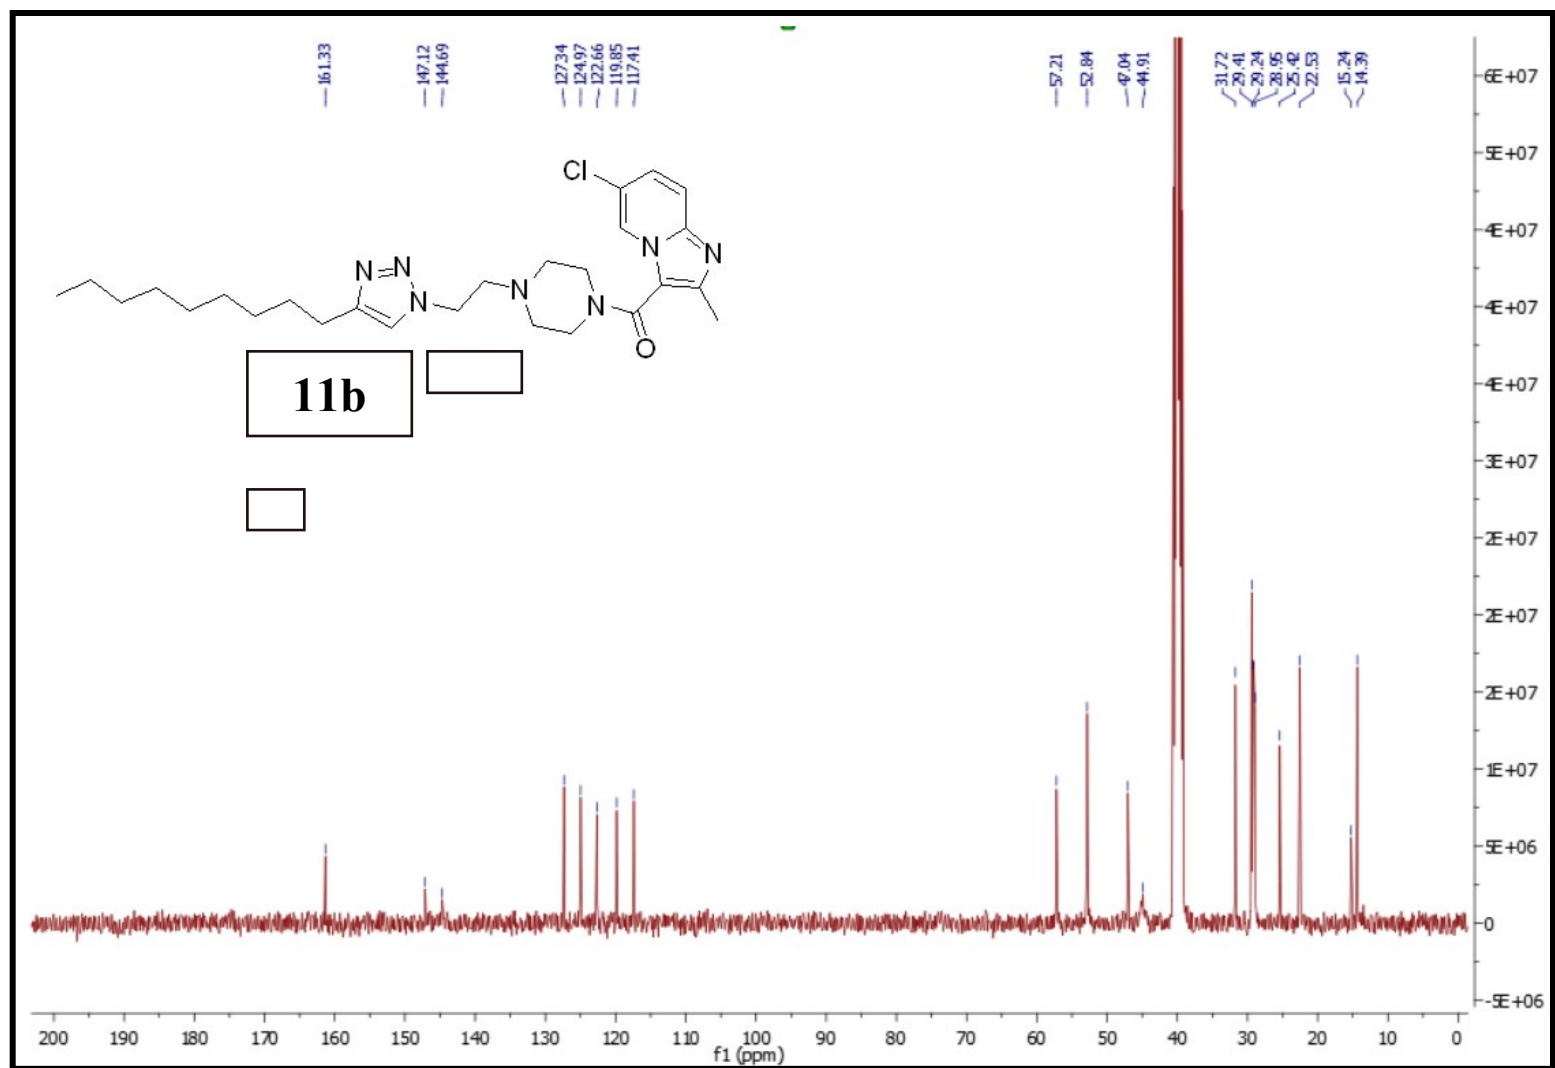

$^{13}\text{C}$ NMR of 11b

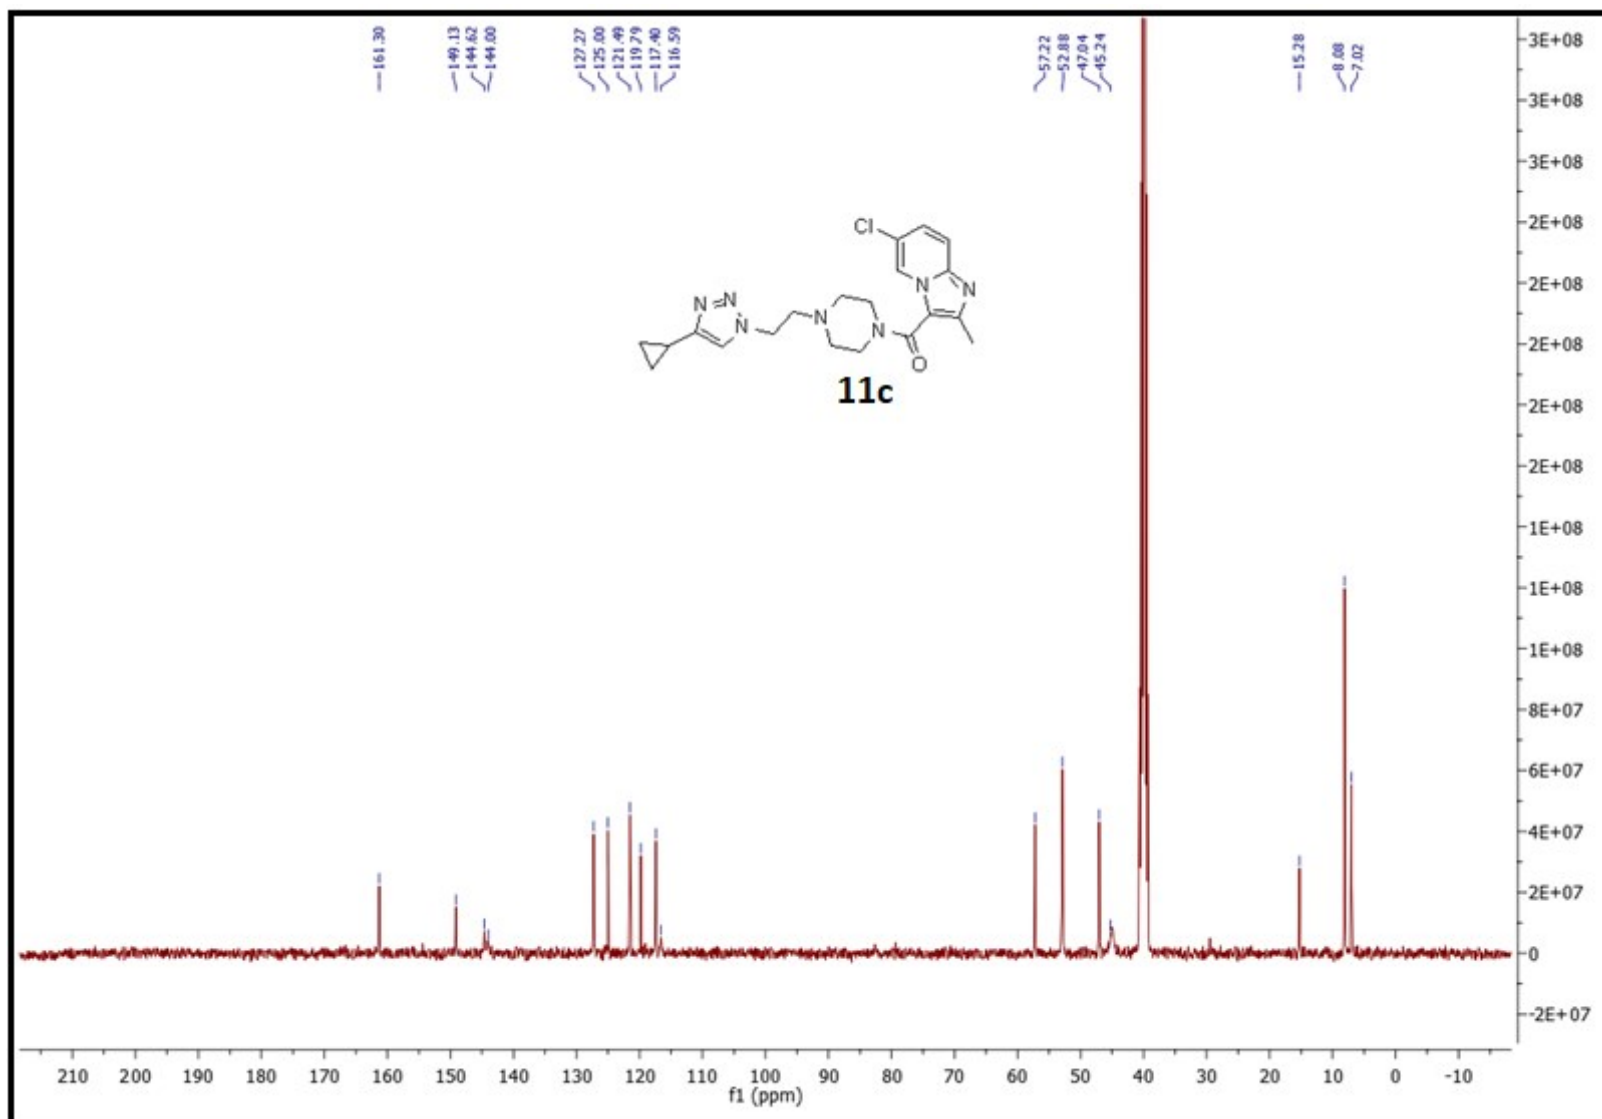

<sup>13</sup>CNMR of 11c

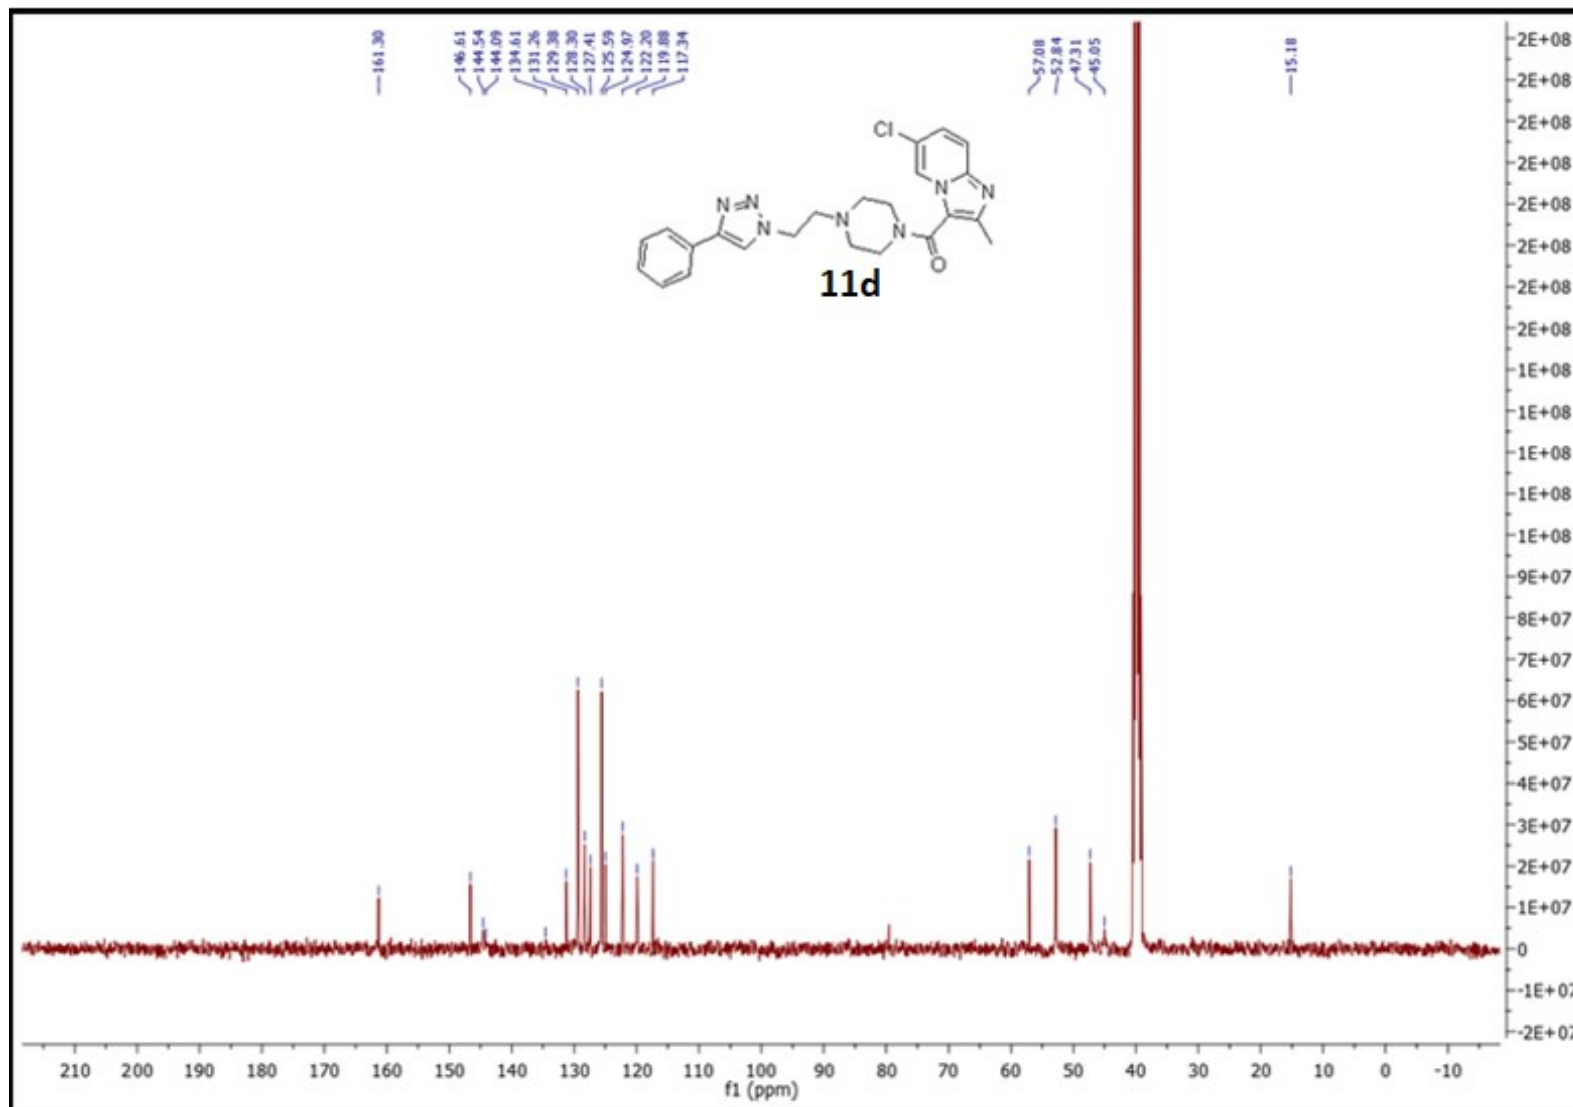

<sup>13</sup>CNMR of 11d

## 8. Mass spectras:

RawMode:Averaged 0.14-0.50(57-207) BasePeak:416(12211650)  
BG Mode:None Segment 1 - Event 1

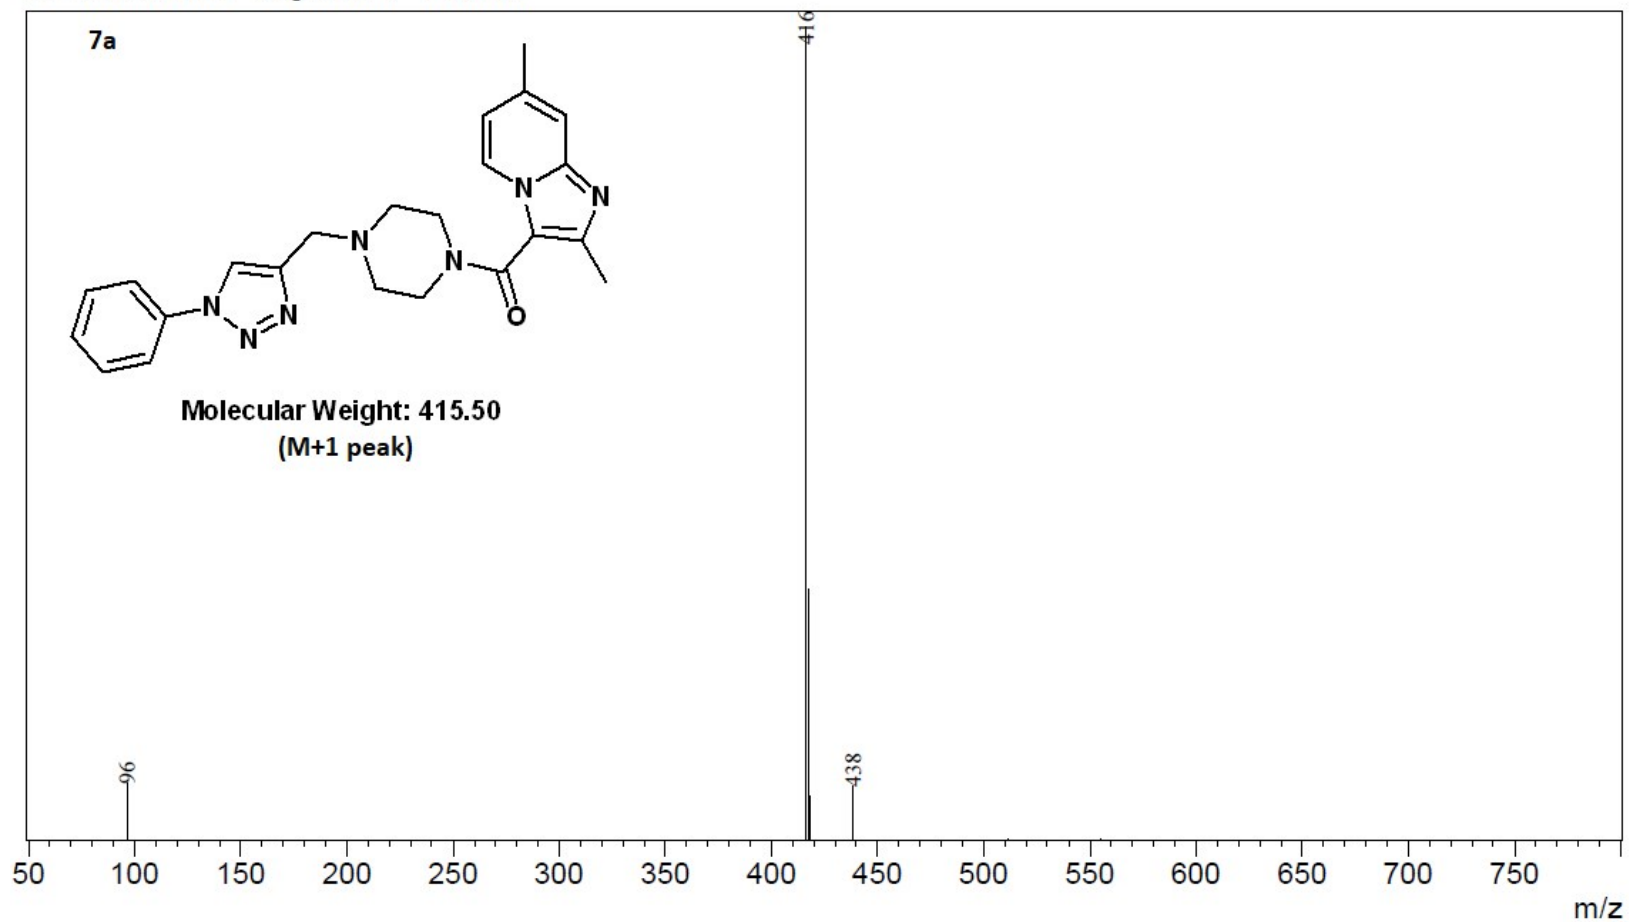

Mass spectra of compound 7a



RawMode:Averaged 0.16-0.36(67-149) BasePeak:461(12417649)  
BG Mode:Averaged 0.00-0.17(1-71) Segment 1 - Event 1

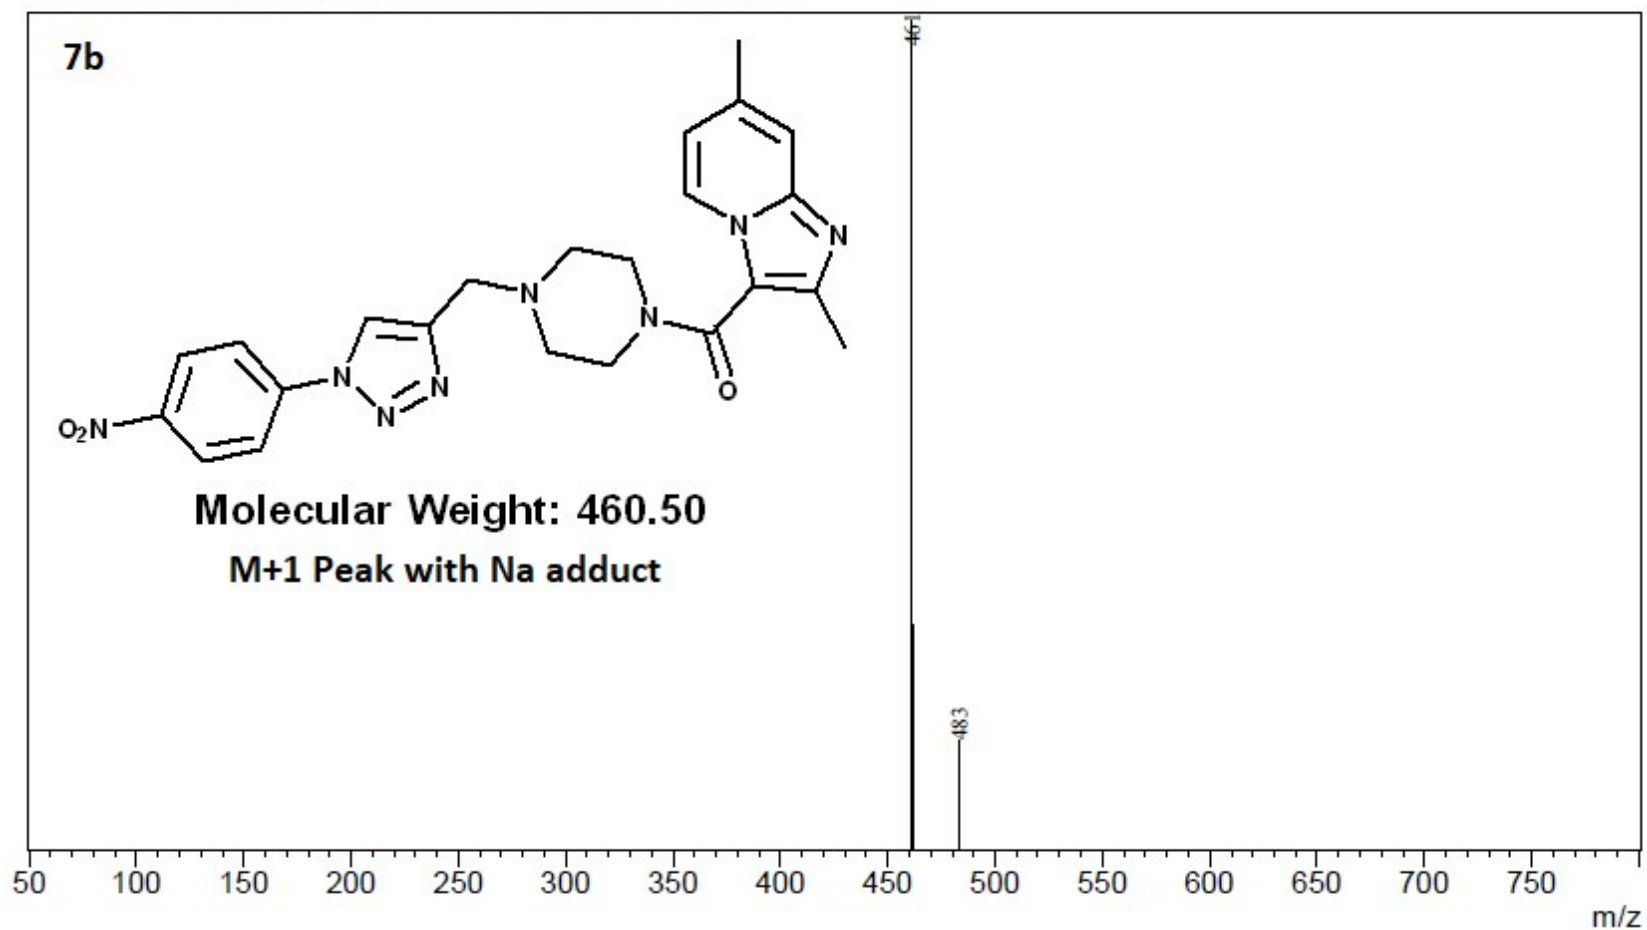

Mass spectra of compound 7b

RawMode:Averaged 0.18-0.31(75-131) BasePeak:484 (7848981) BG  
Mode:Averaged 0.00-0.16(1-67) Segment 1 - Event 1

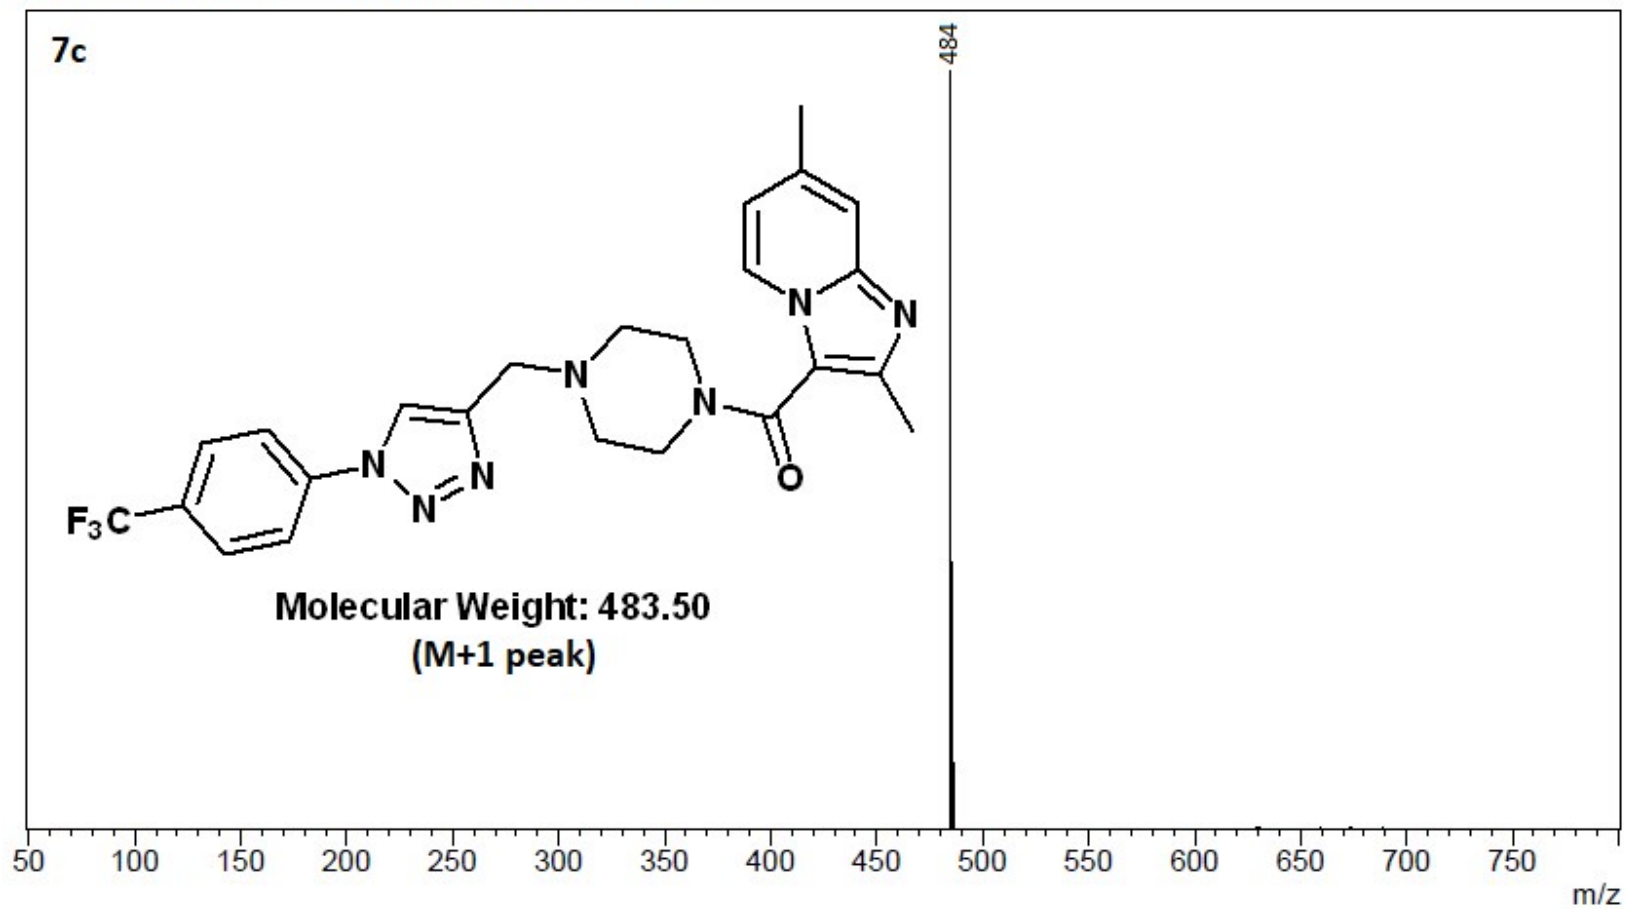

Mass spectra of compound 7c

RawMode:Averaged 0.18-0.37(75-153) BasePeak:444(15896999)  
BG Mode:Averaged 0.00-0.17(1-73) Segment 1 - Event 1

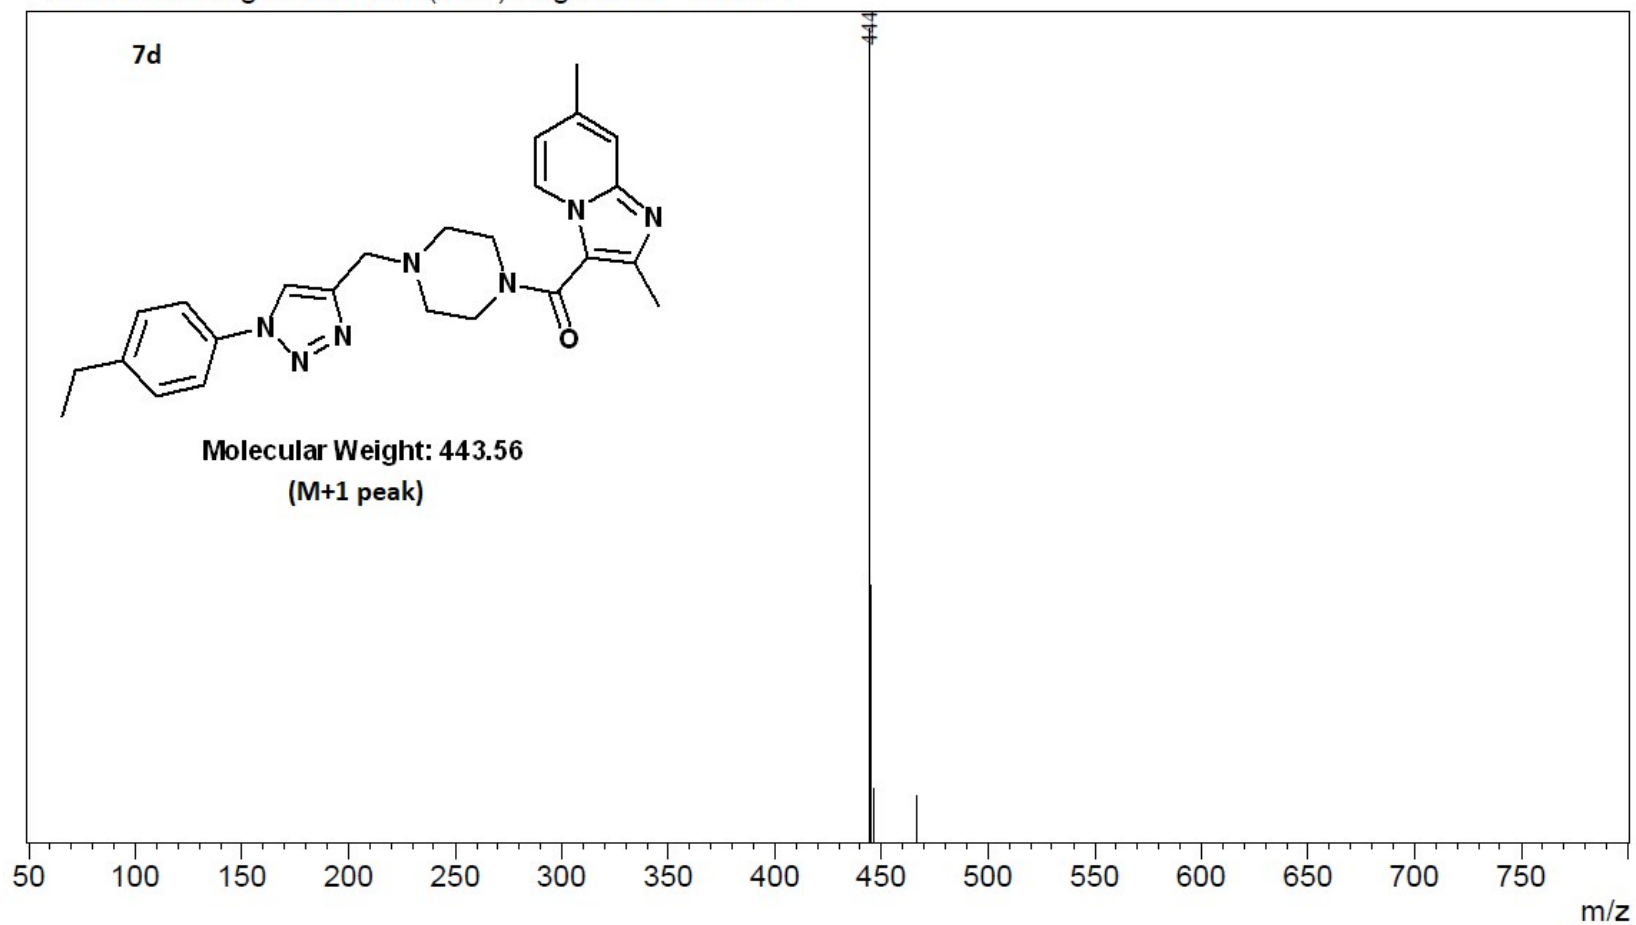

Mass spectra of compound 7d

RawMode:Averaged 0.18-0.37(75-155) BasePeak:494(9149090)  
BG Mode:Averaged 0.00-0.15(1-65) Segment 1 - Event 1

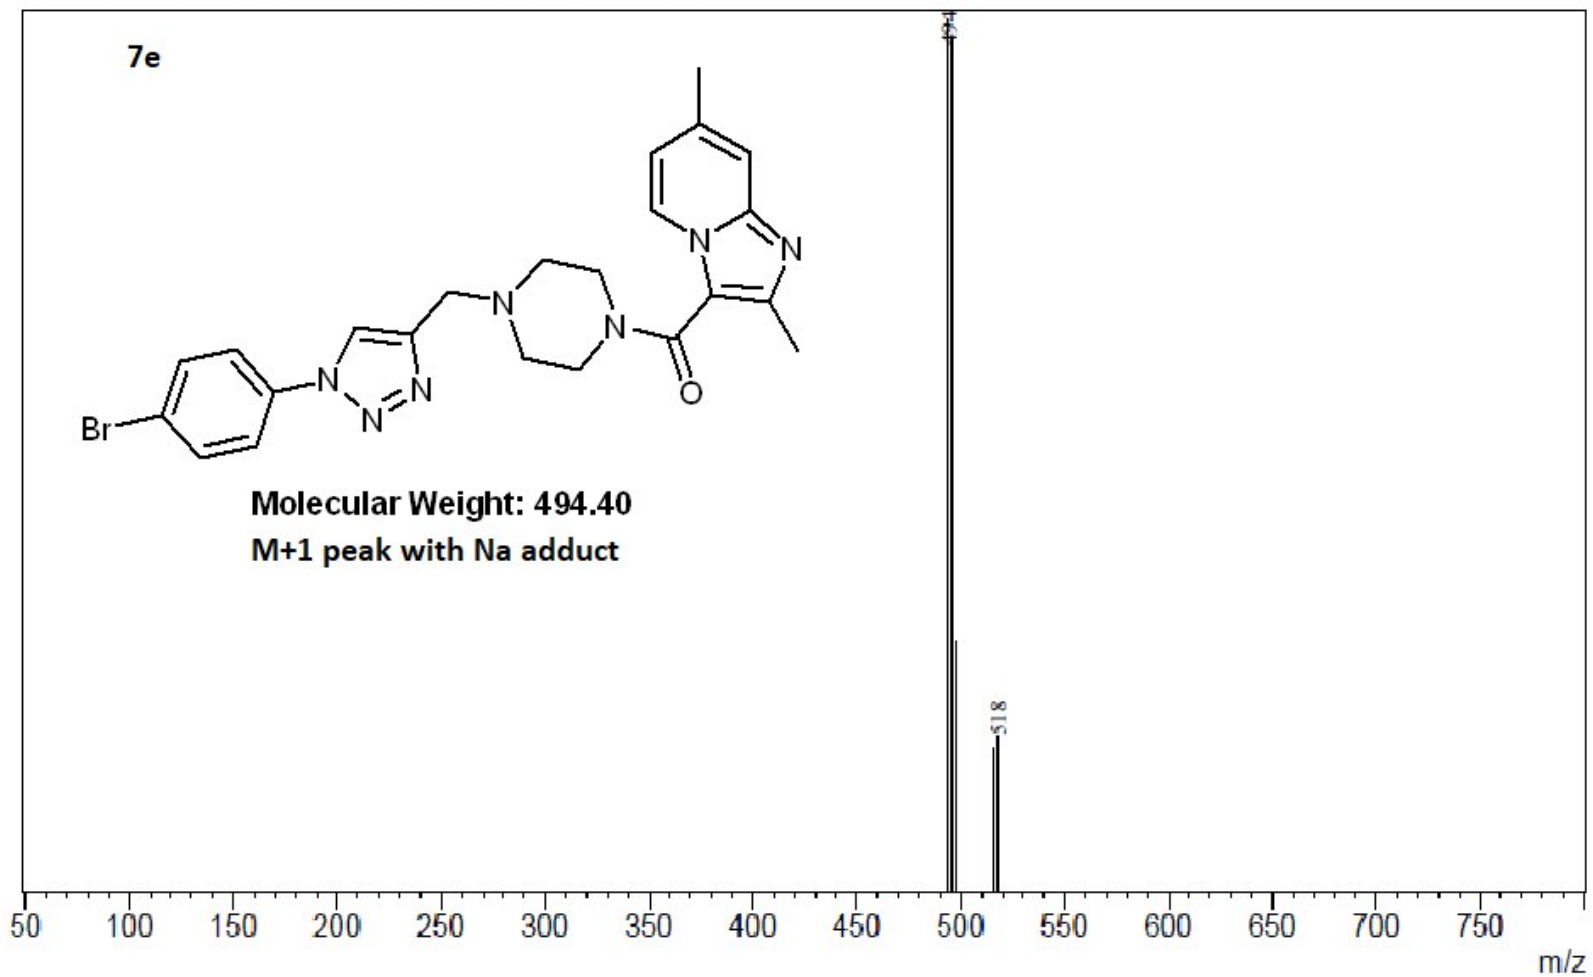

Mass spectra of compound 7e

RawMode:Averaged 0.17-0.34(73-141) BasePeak:461(11448340)  
BG Mode:Averaged 0.00-0.17(1-71) Segment 1 - Event 1

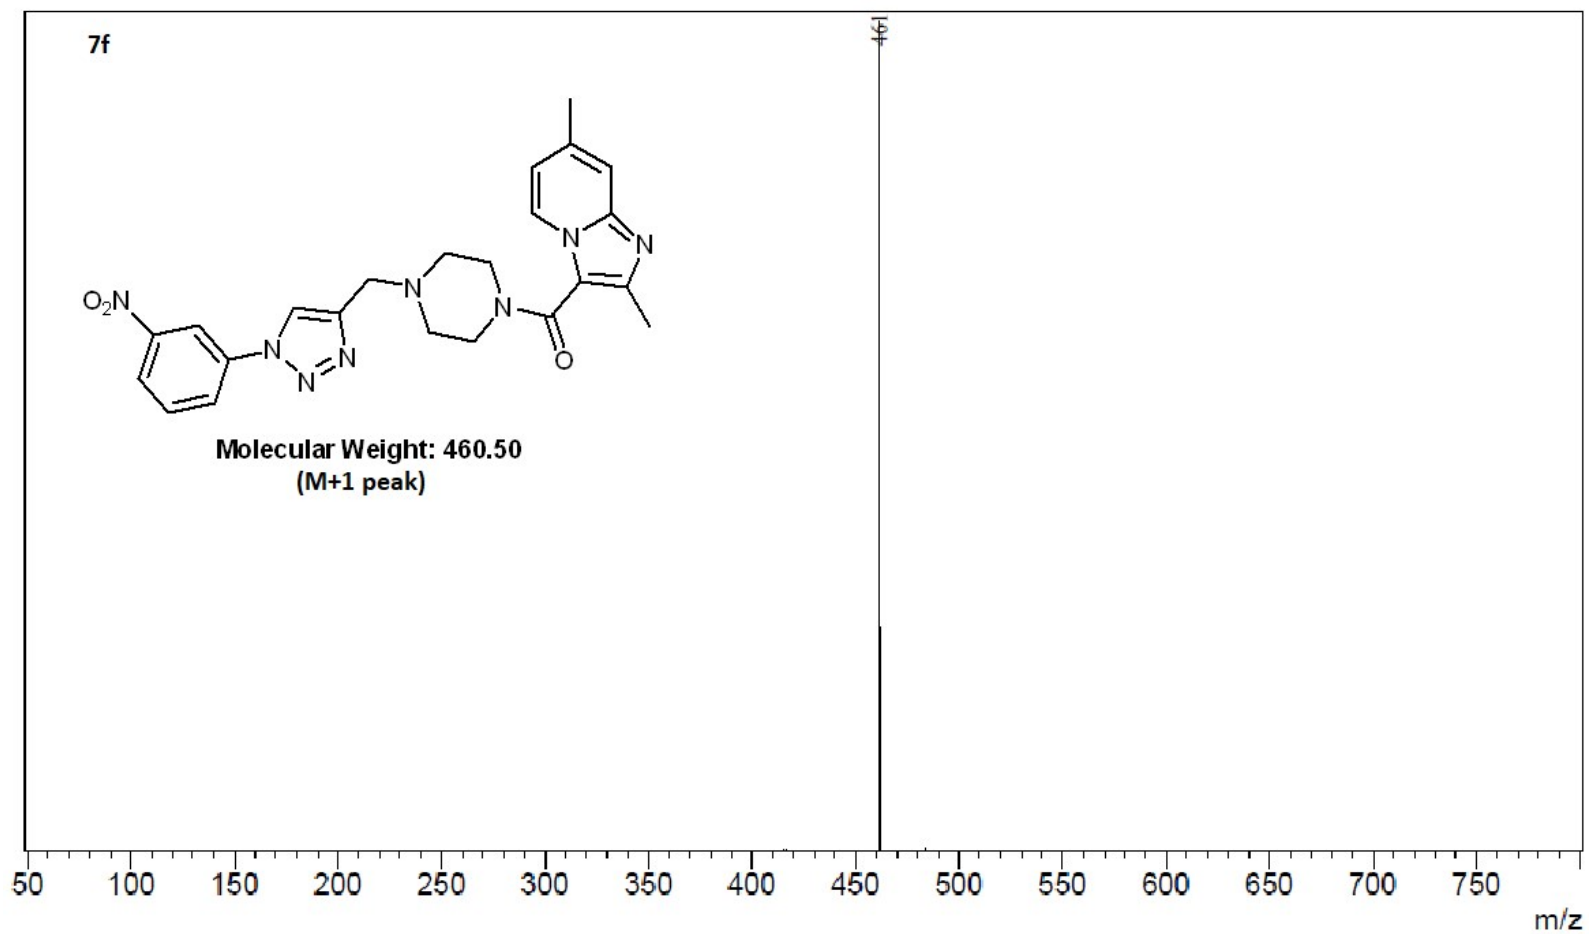

Mass spectra of compound 7f

RawMode:Averaged 0.19-0.31(79-131) BasePeak:446 (5670576)  
BG Mode:Averaged 0.00-0.16(1-67) Segment 1 - Event 1

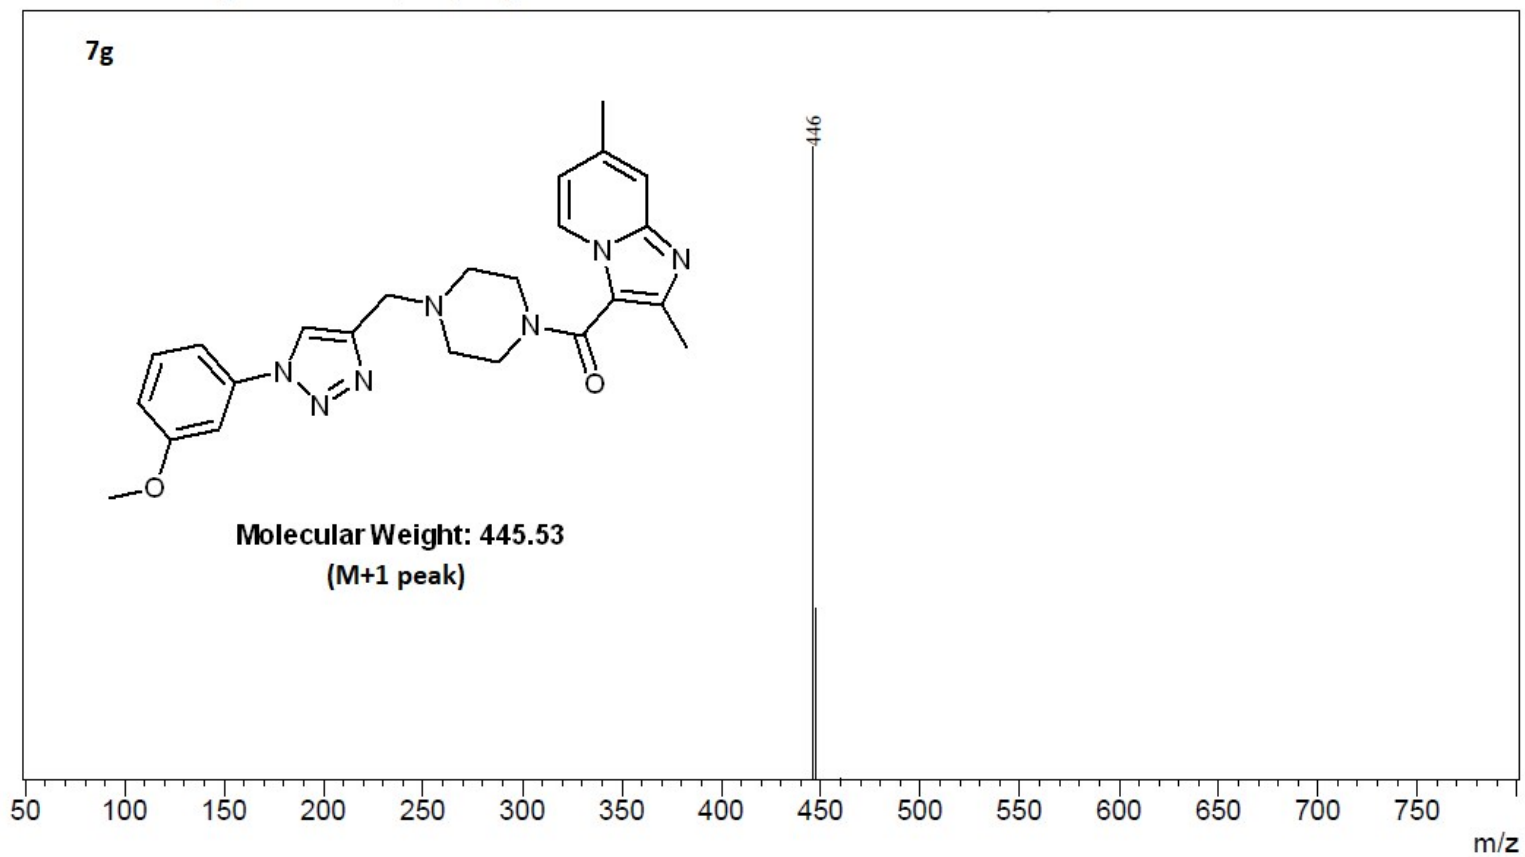

**Mass spectra of compound 7g**

RawMode:Averaged 0.17-0.36(73-149) BasePeak:450(11200621)  
BG Mode:Averaged 0.00-0.16(1-69) Segment 1 - Event 1

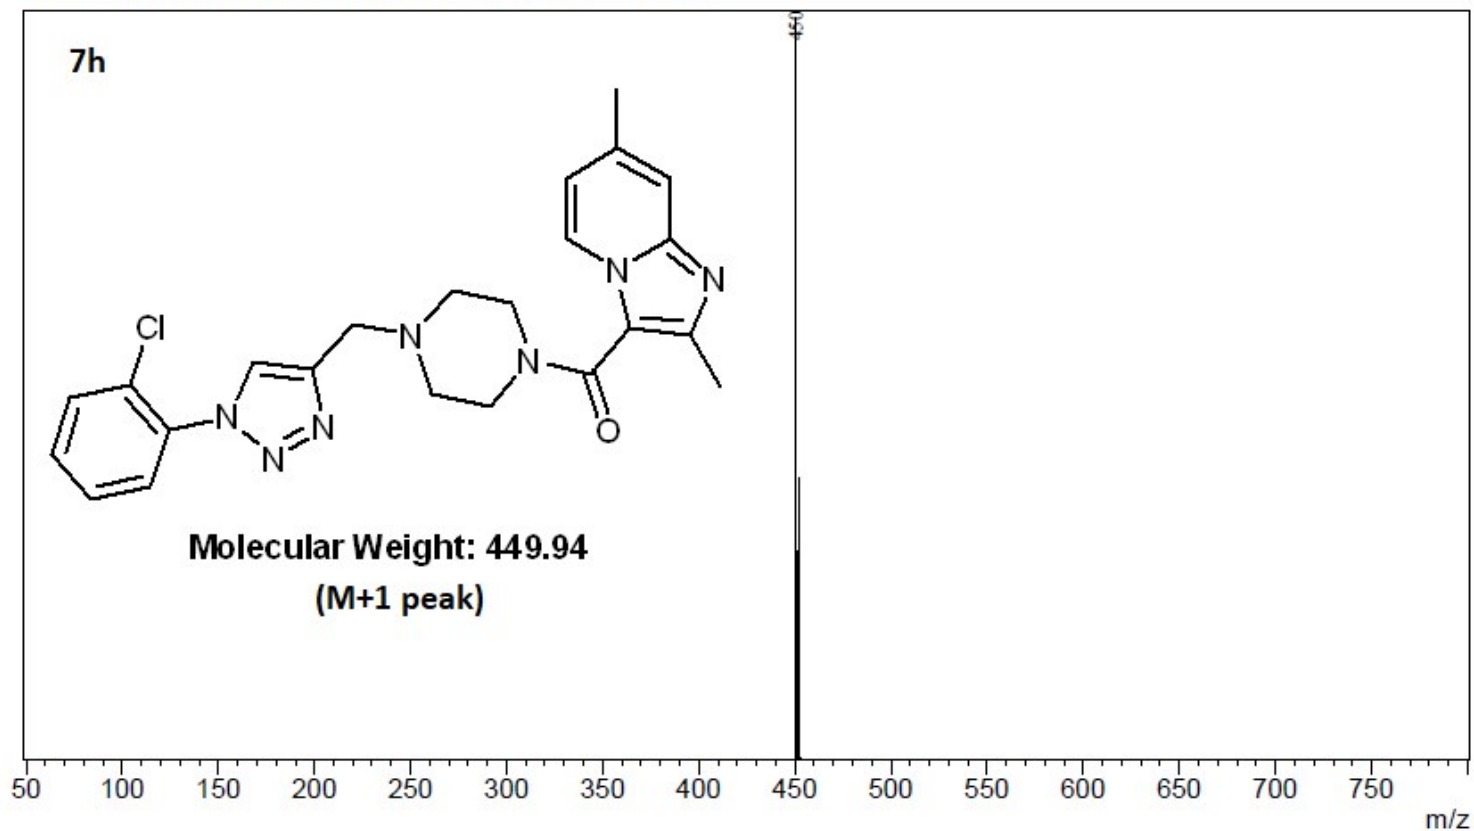

**Mass spectra of compound 7h**

RawMode:Averaged 0.17-0.36(73-151) BasePeak:468(13032017)  
BG Mode:Averaged 0.00-0.15(1-63) Segment 1 - Event 1

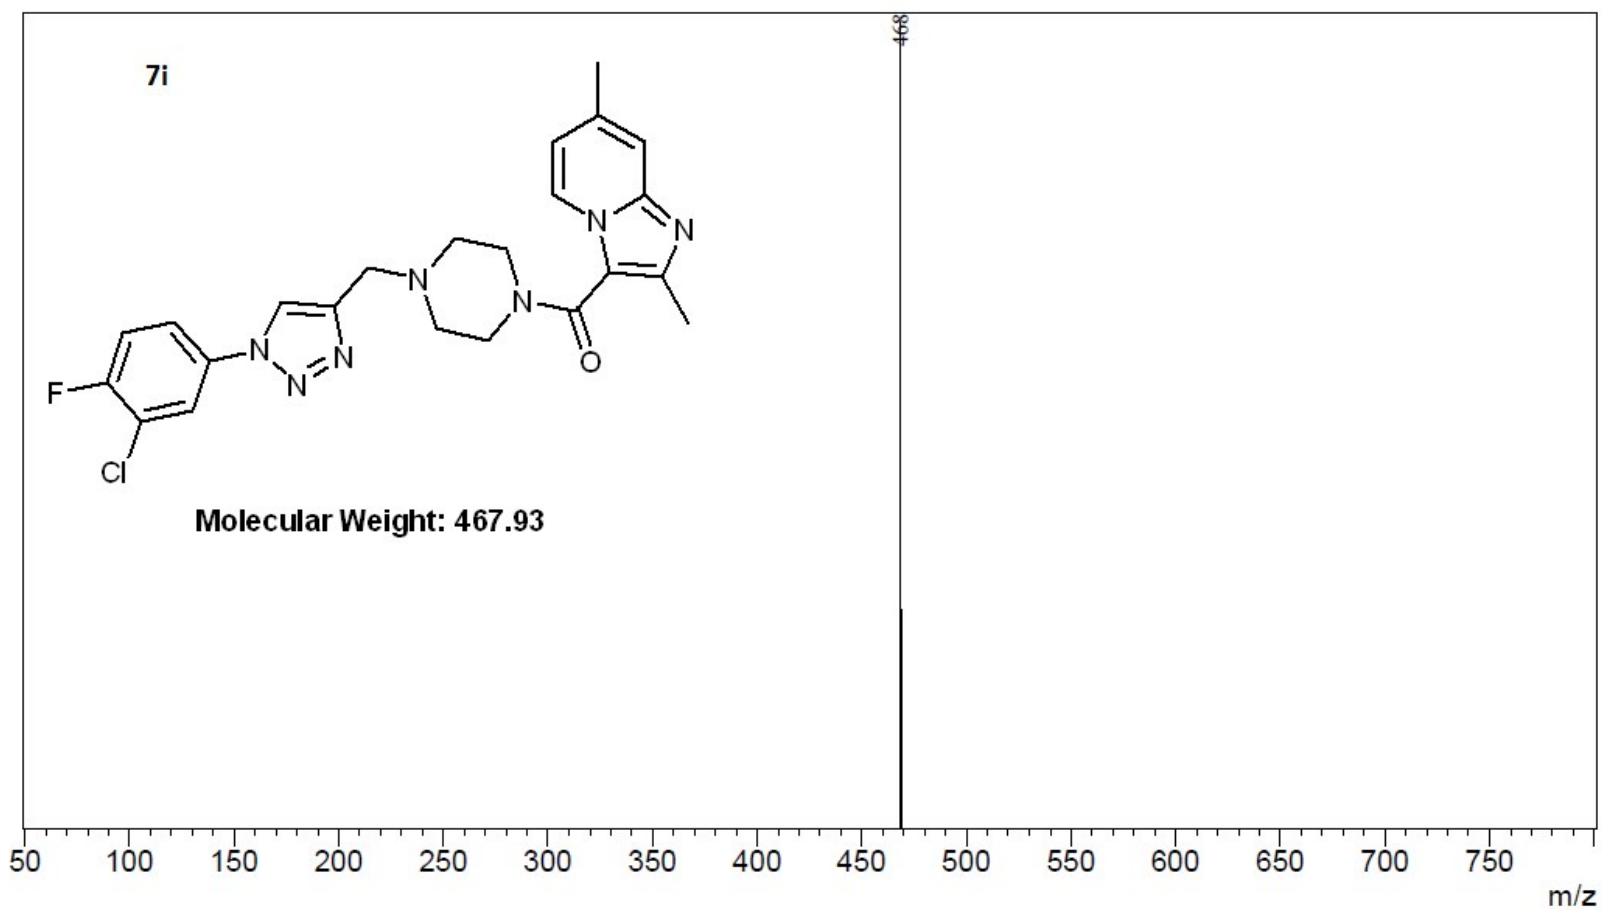

Mass spectra of compound 7i



RawMode:Averaged 0.15-0.35(61-145) BasePeak:491(14992759)  
BG Mode:Averaged 0.00-0.15(1-63) Segment 1 - Event 1

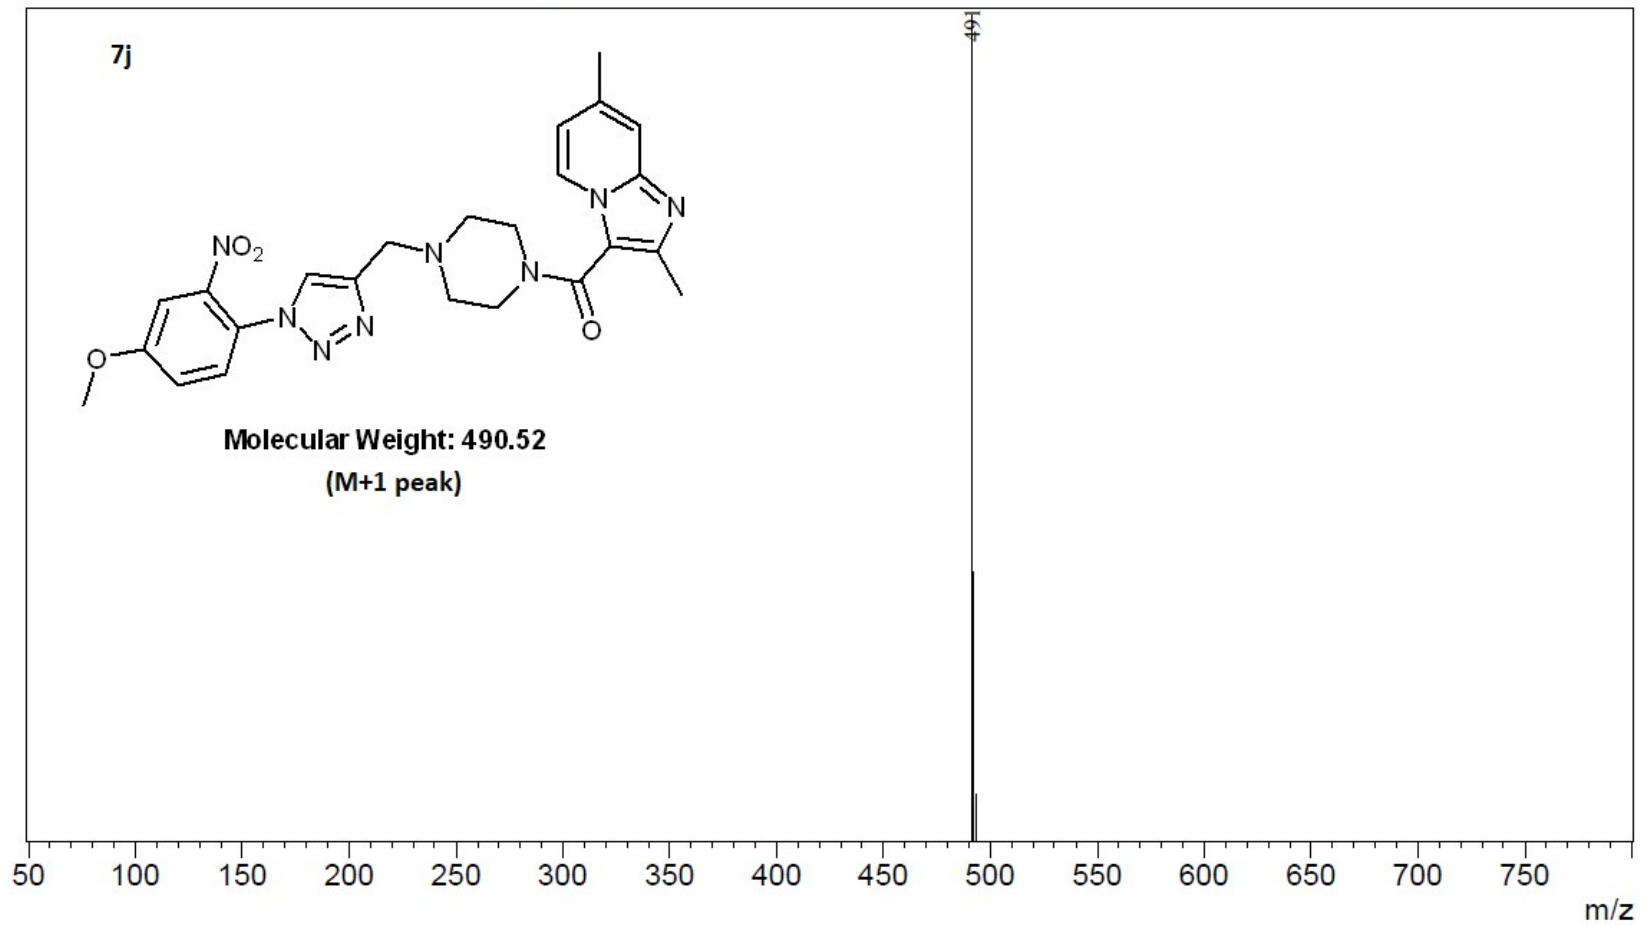

Mass spectra of compound 7j

RawMode:Averaged 0.18-0.39(75-161) BasePeak:436(4890701)  
BG Mode:Averaged 0.00-0.16(1-67) Segment 1 - Event 1

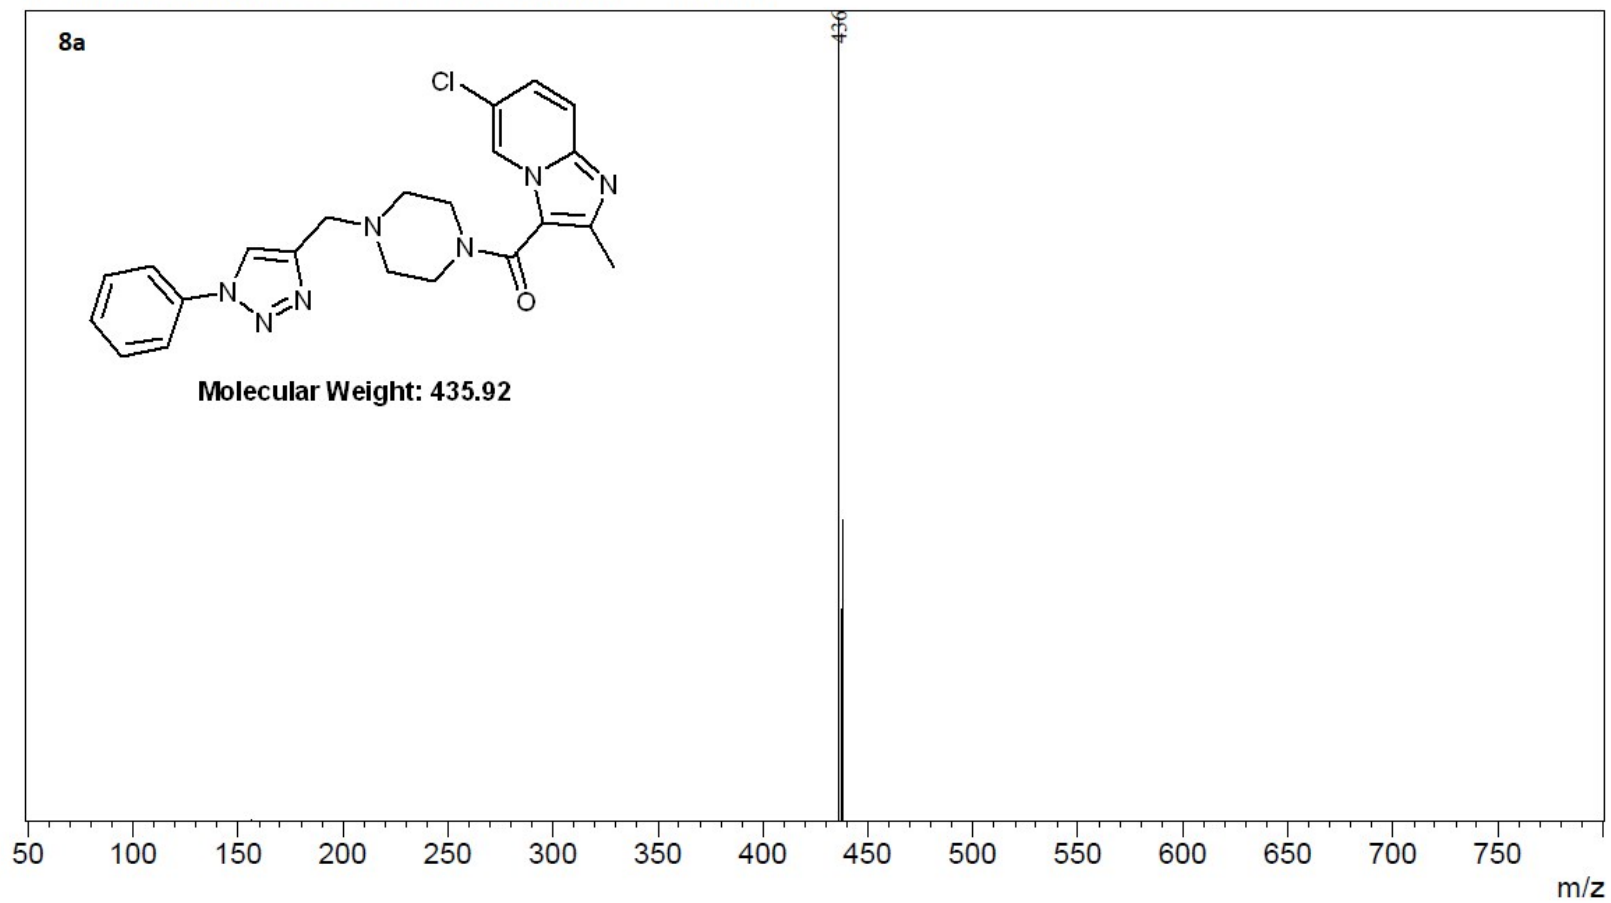

**Mass spectra of compound 8a**

RawMode:Averaged 0.18-0.37(75-155) BasePeak:481(5431770)  
BG Mode:Averaged 0.00-0.17(1-73) Segment 1 - Event 1

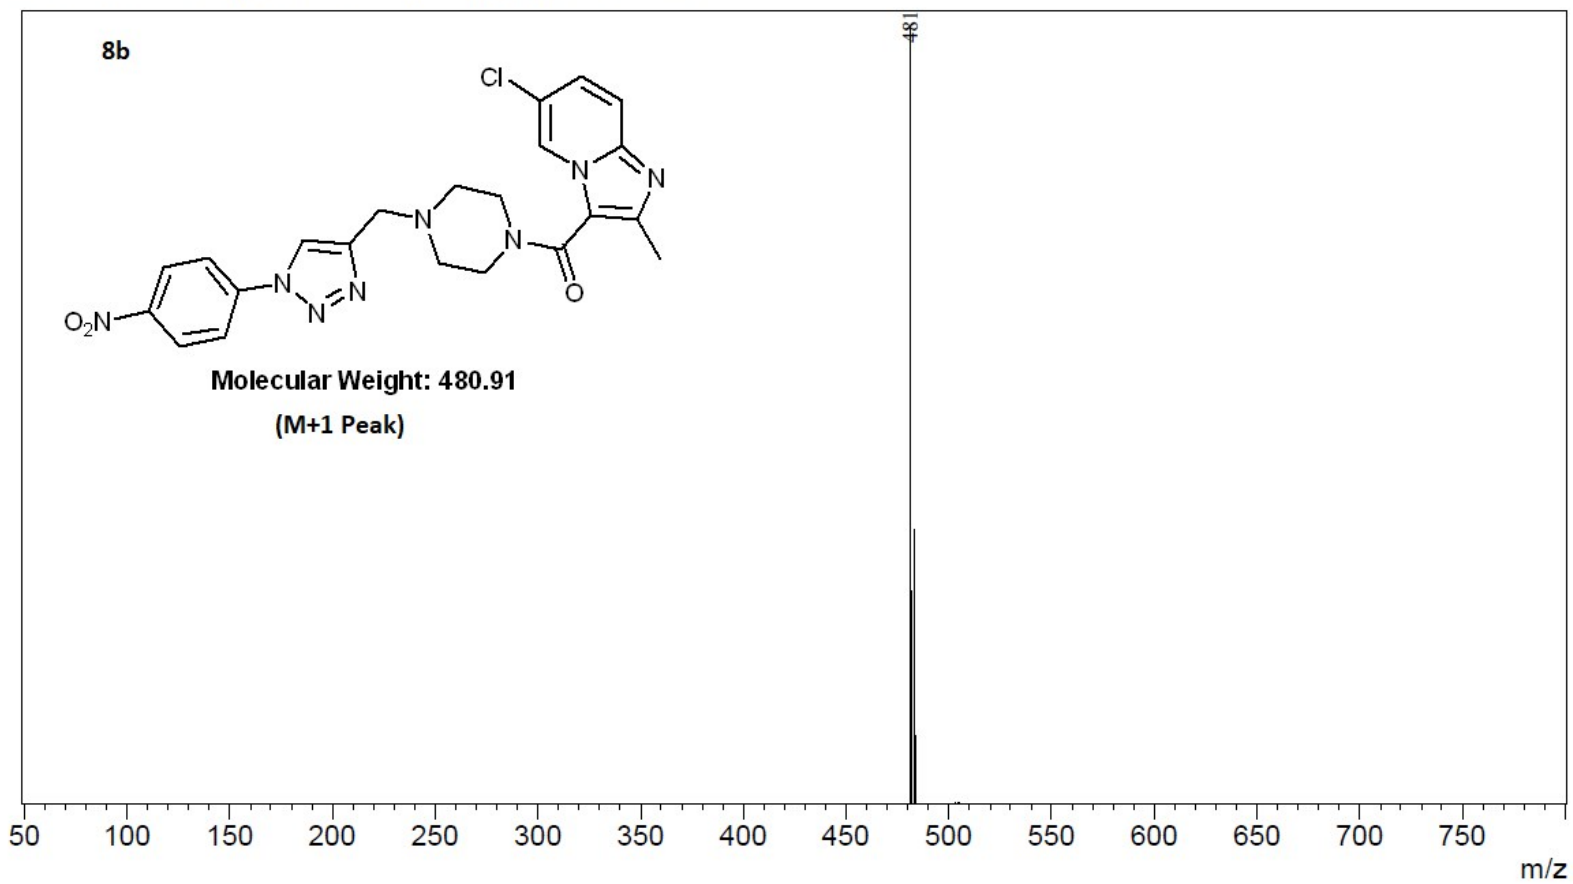

**Mass spectra of compound 8b**

RawMode:Averaged 0.18-0.36(75-151) BasePeak:504(5747341)  
BG Mode:Averaged 0.00-0.16(1-69) Segment 1 - Event 1

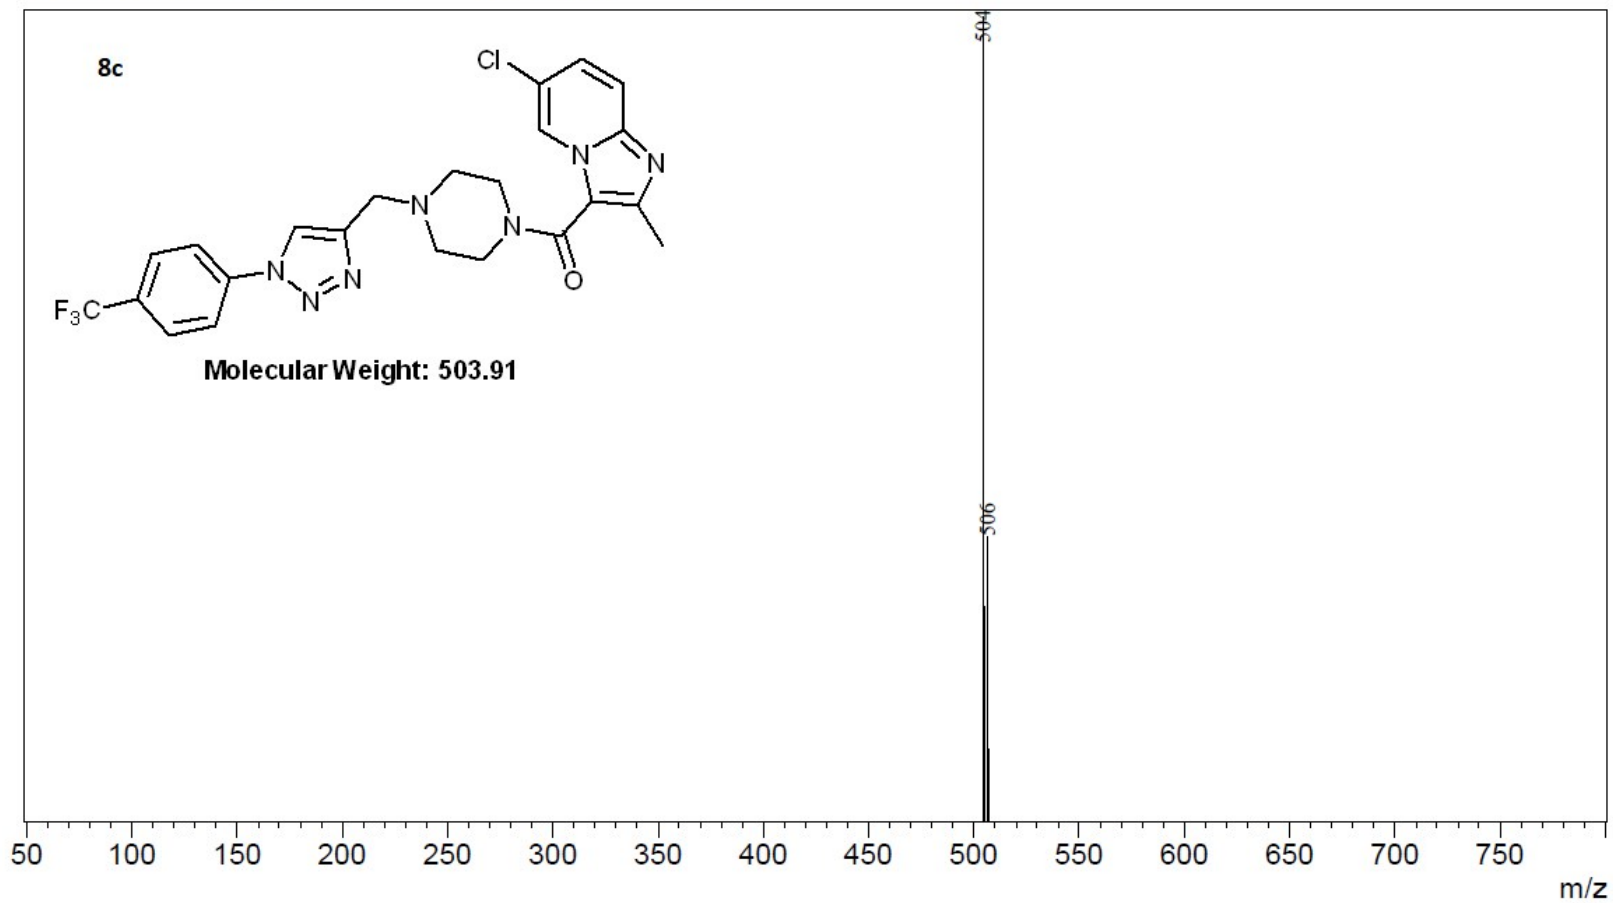

**Mass spectra of compound 8c**

RawMode:Averaged 0.17-0.42(73-173) BasePeak:464(6207993)  
BG Mode:Averaged 0.00-0.16(1-67) Segment 1 - Event 1

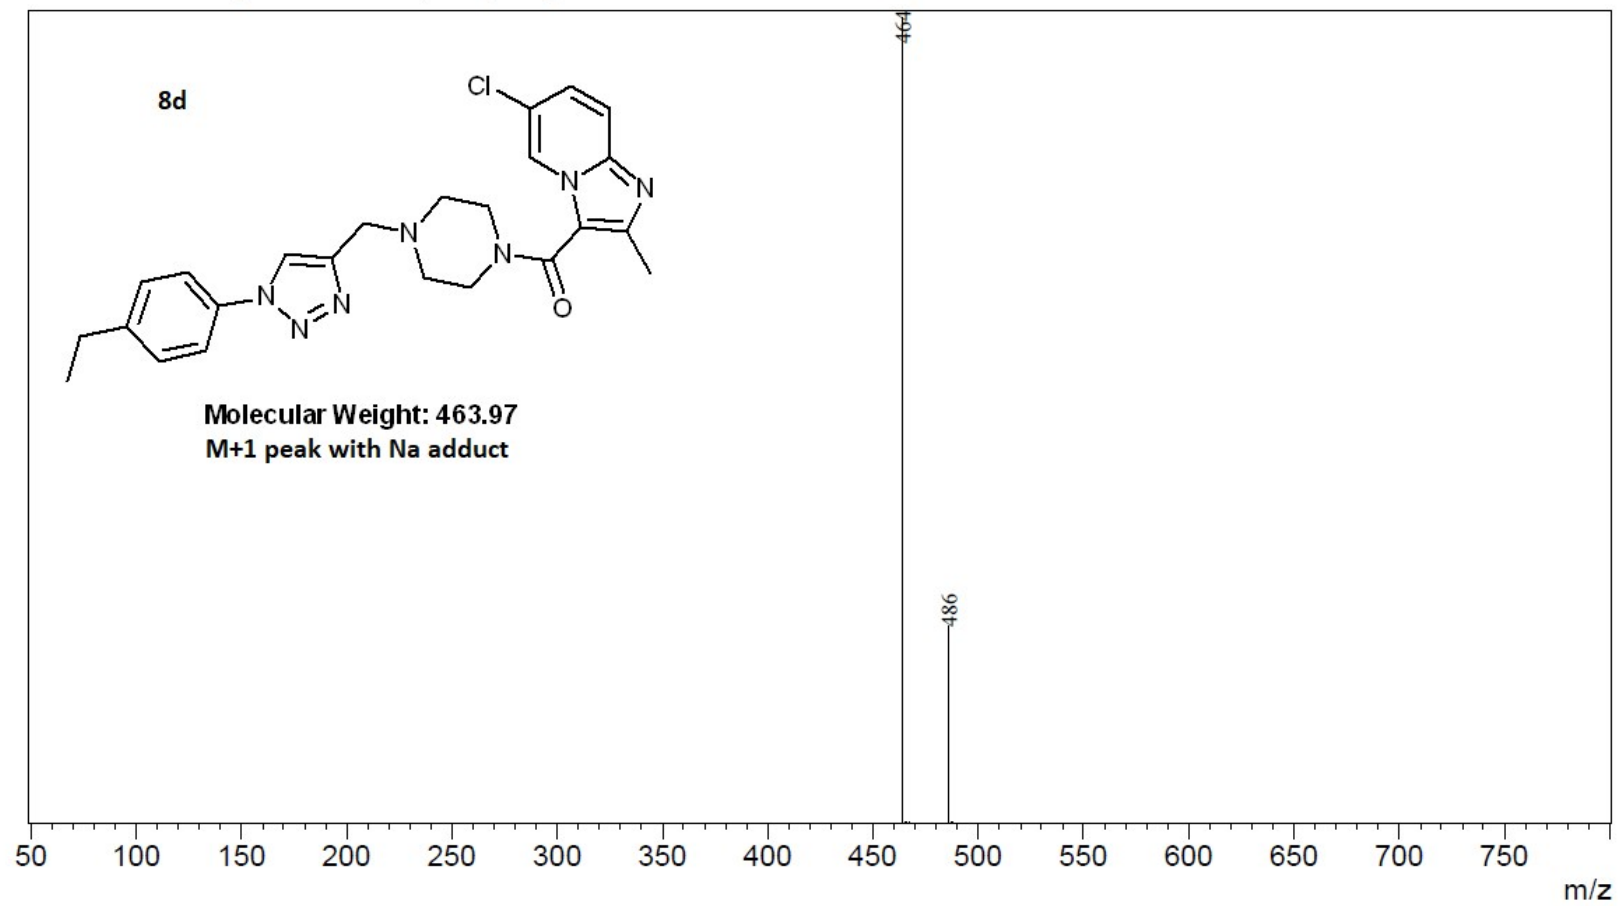

**Mass spectra of compound 8d**

RawMode:Averaged 0.17-0.33(73-137) BasePeak:454(7918062)  
BG Mode:Averaged 0.00-0.16(1-67) Segment 1 - Event 1

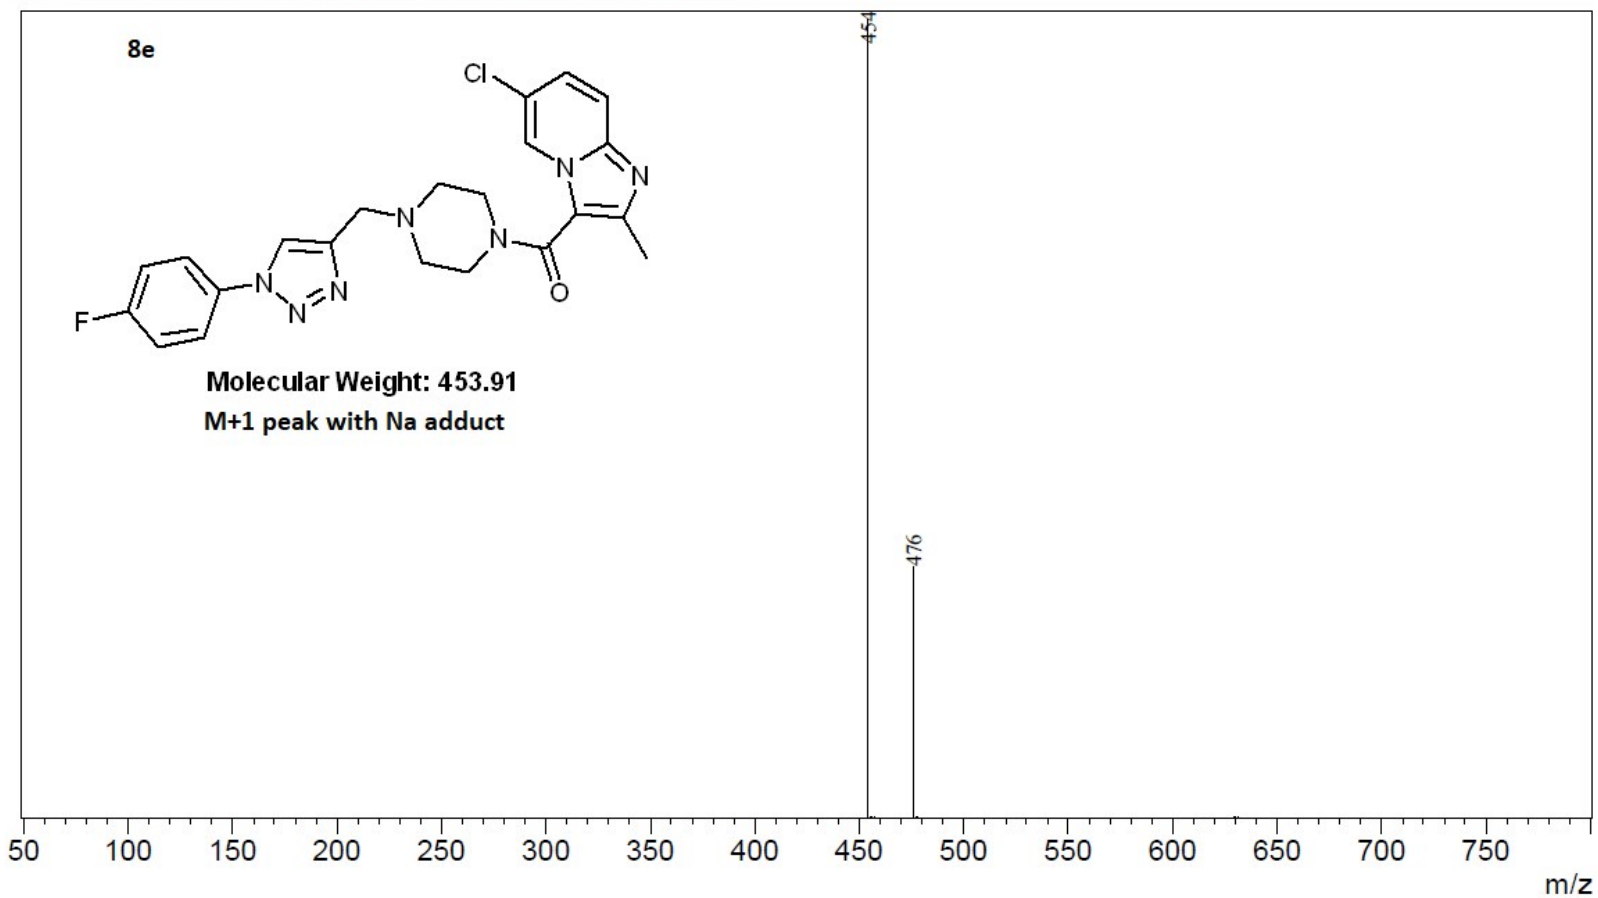

**Mass spectra of compound 8e**

RawMode:Averaged 0.16-0.34(69-141) BasePeak:516(3493518)  
BG Mode:Averaged 0.00-0.18(3-77) Segment 1 - Event 1

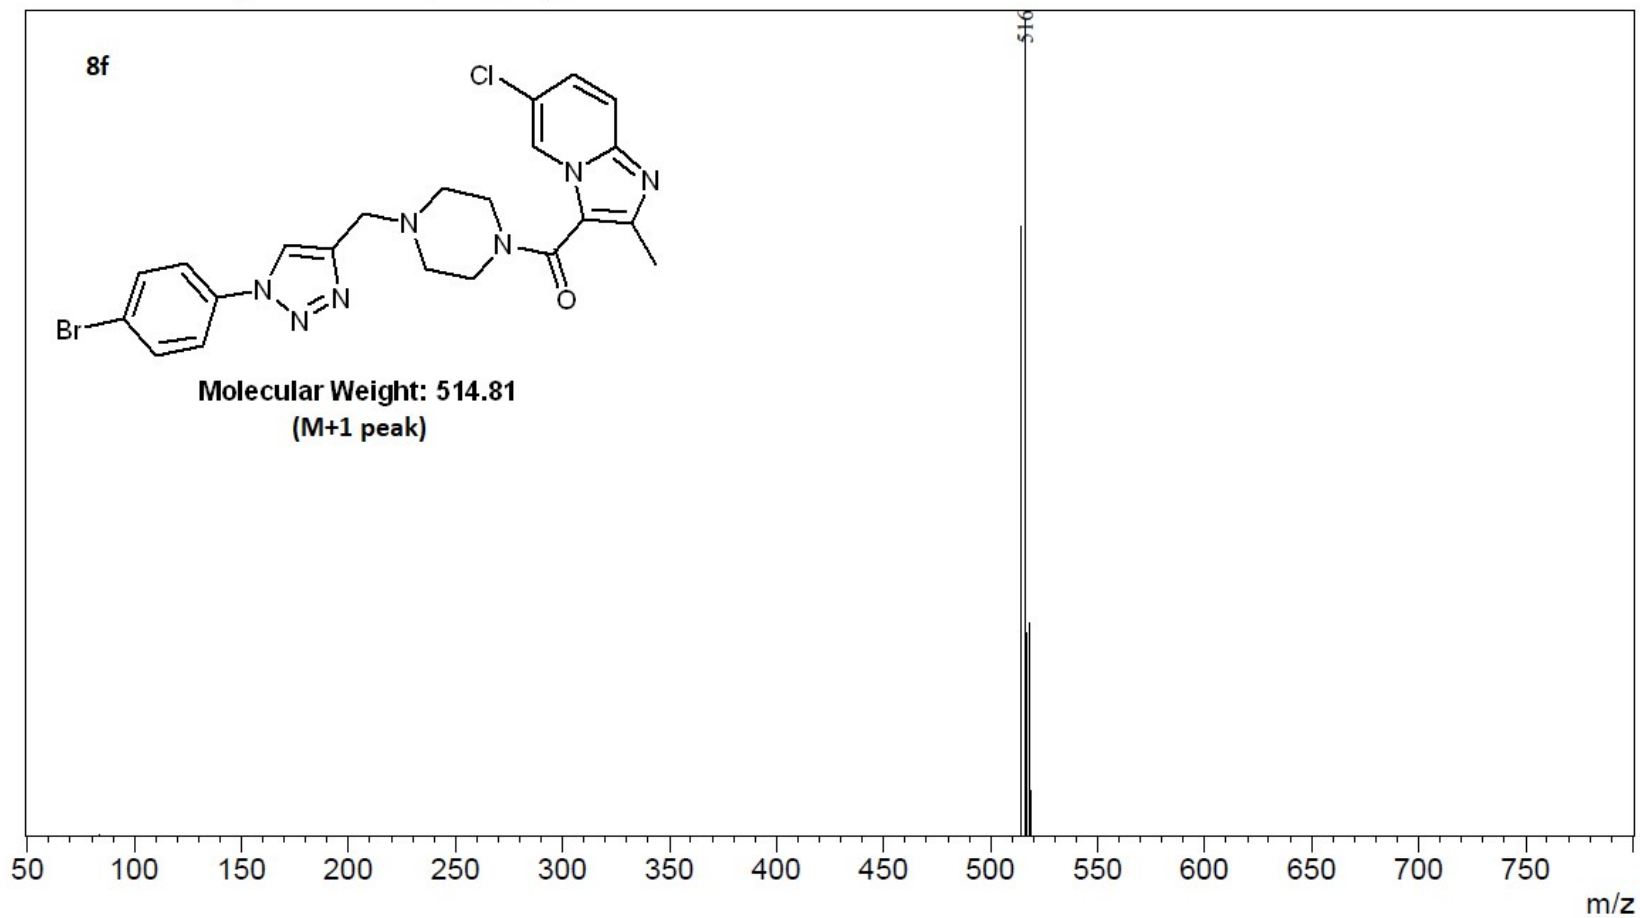

Mass spectra of compound 8f

RawMode:Averaged 0.18-0.37(75-155) BasePeak:481(6046832)  
BG Mode:Averaged 0.00-0.17(1-73) Segment 1 - Event 1

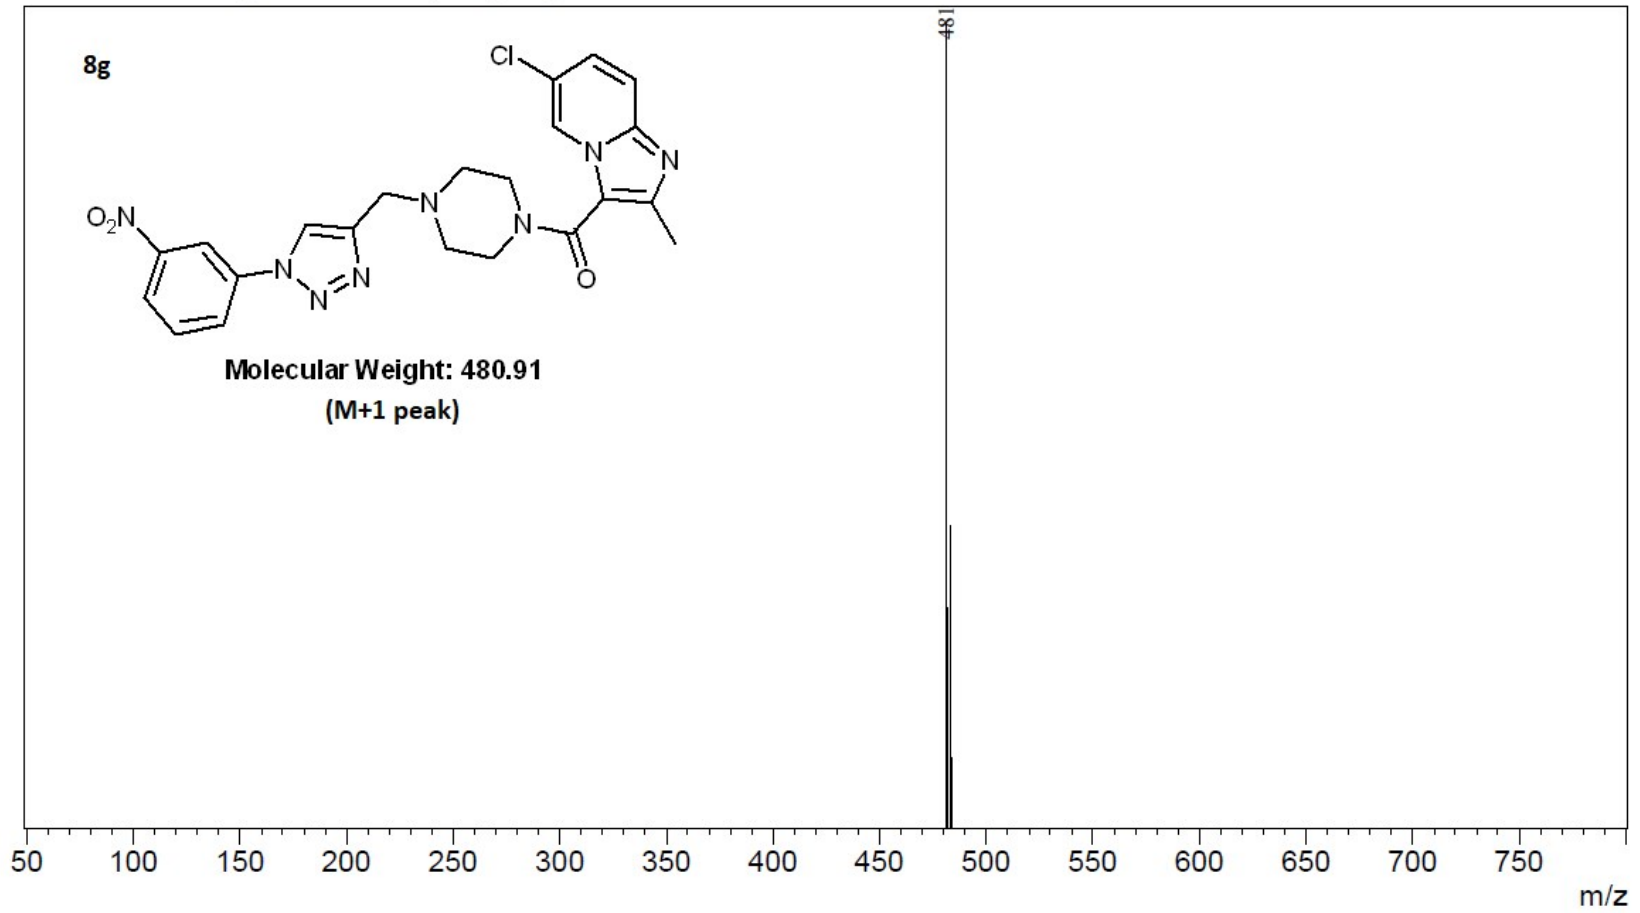

**Mass spectra of compound 8g**



RawMode:Averaged 0.19-0.33(79-139) BasePeak:504(5039657)  
BG Mode:Averaged 0.00-0.17(1-73) Segment 1 - Event 1

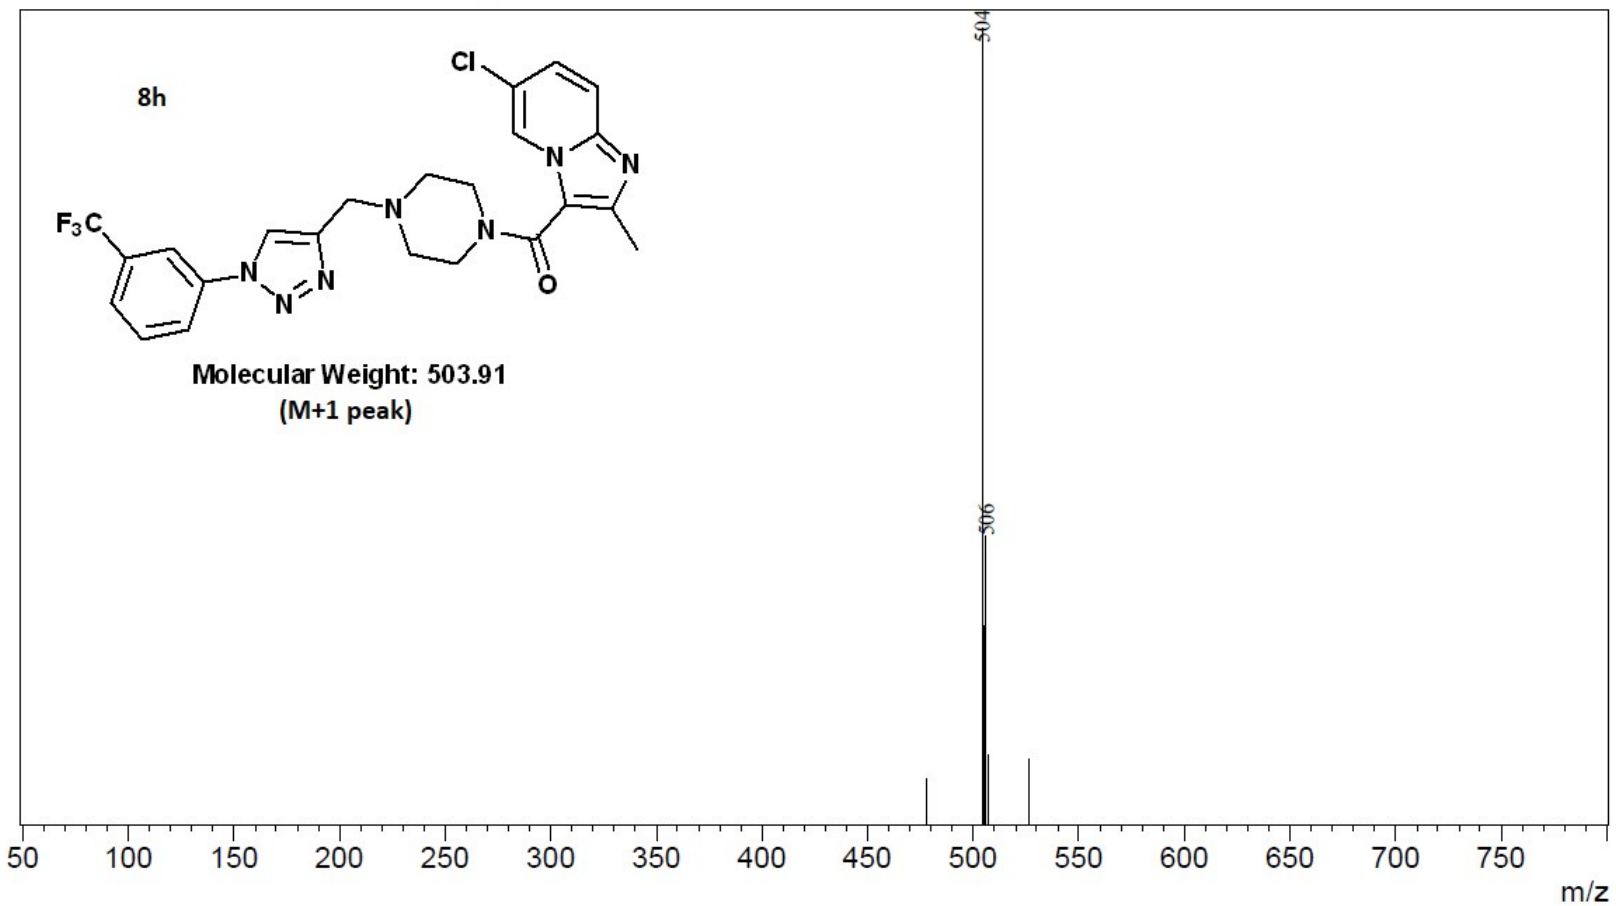

**Mass spectra of compound 8h**

RawMode:Averaged 0.26-0.43(109-177) BasePeak:466(4035607)  
BG Mode:Averaged 0.00-0.25(1-103) Segment 1 - Event 1

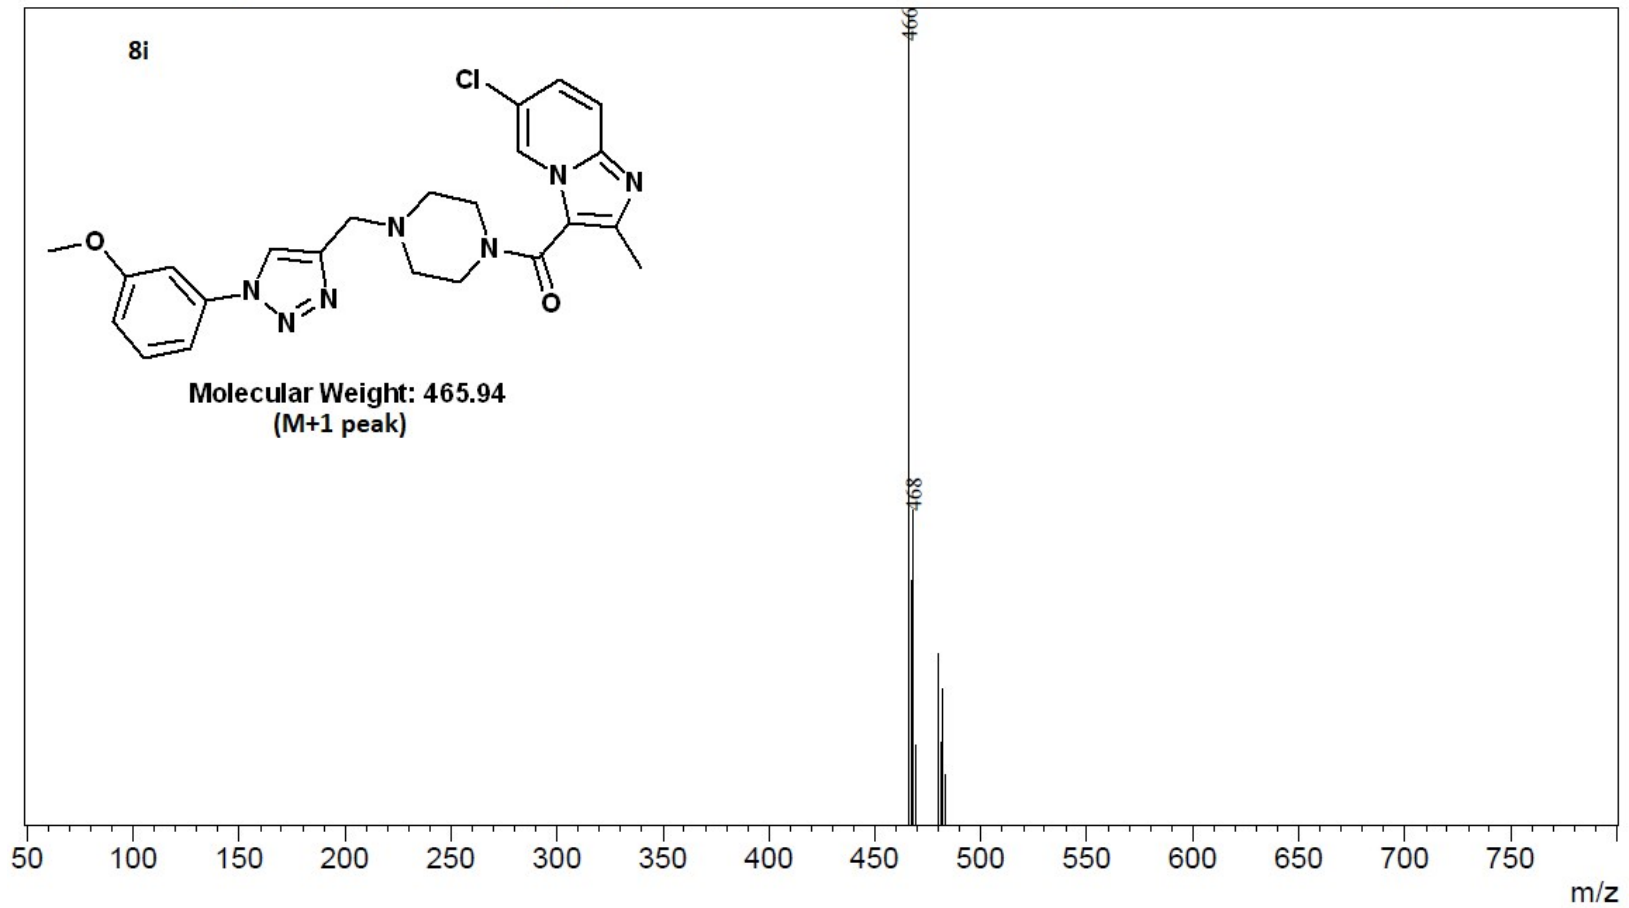

Mass spectra of compound **8i**

RawMode:Averaged 0.15-0.35(61-145) BasePeak:470(4019964)  
BG Mode:Averaged 0.00-0.16(1-69) Segment 1 - Event 1

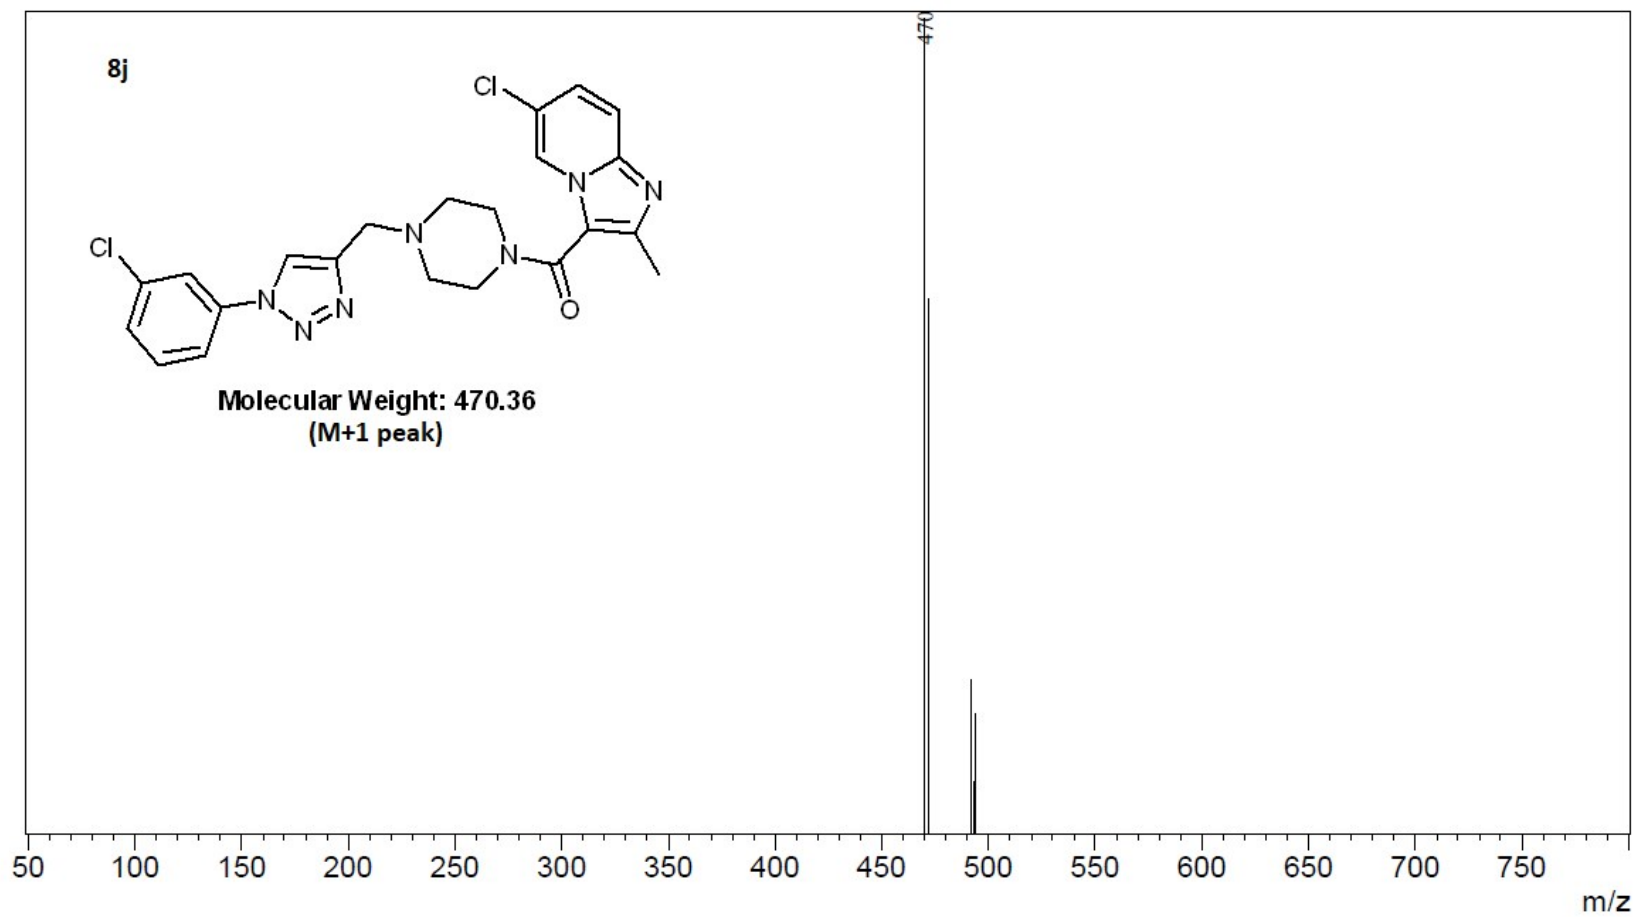

**Mass spectra of compound 8j**

RawMode:Averaged 0.18-0.39(77-161) BasePeak:454(7008150)  
BG Mode:Averaged 0.00-0.18(1-75) Segment 1 - Event 1

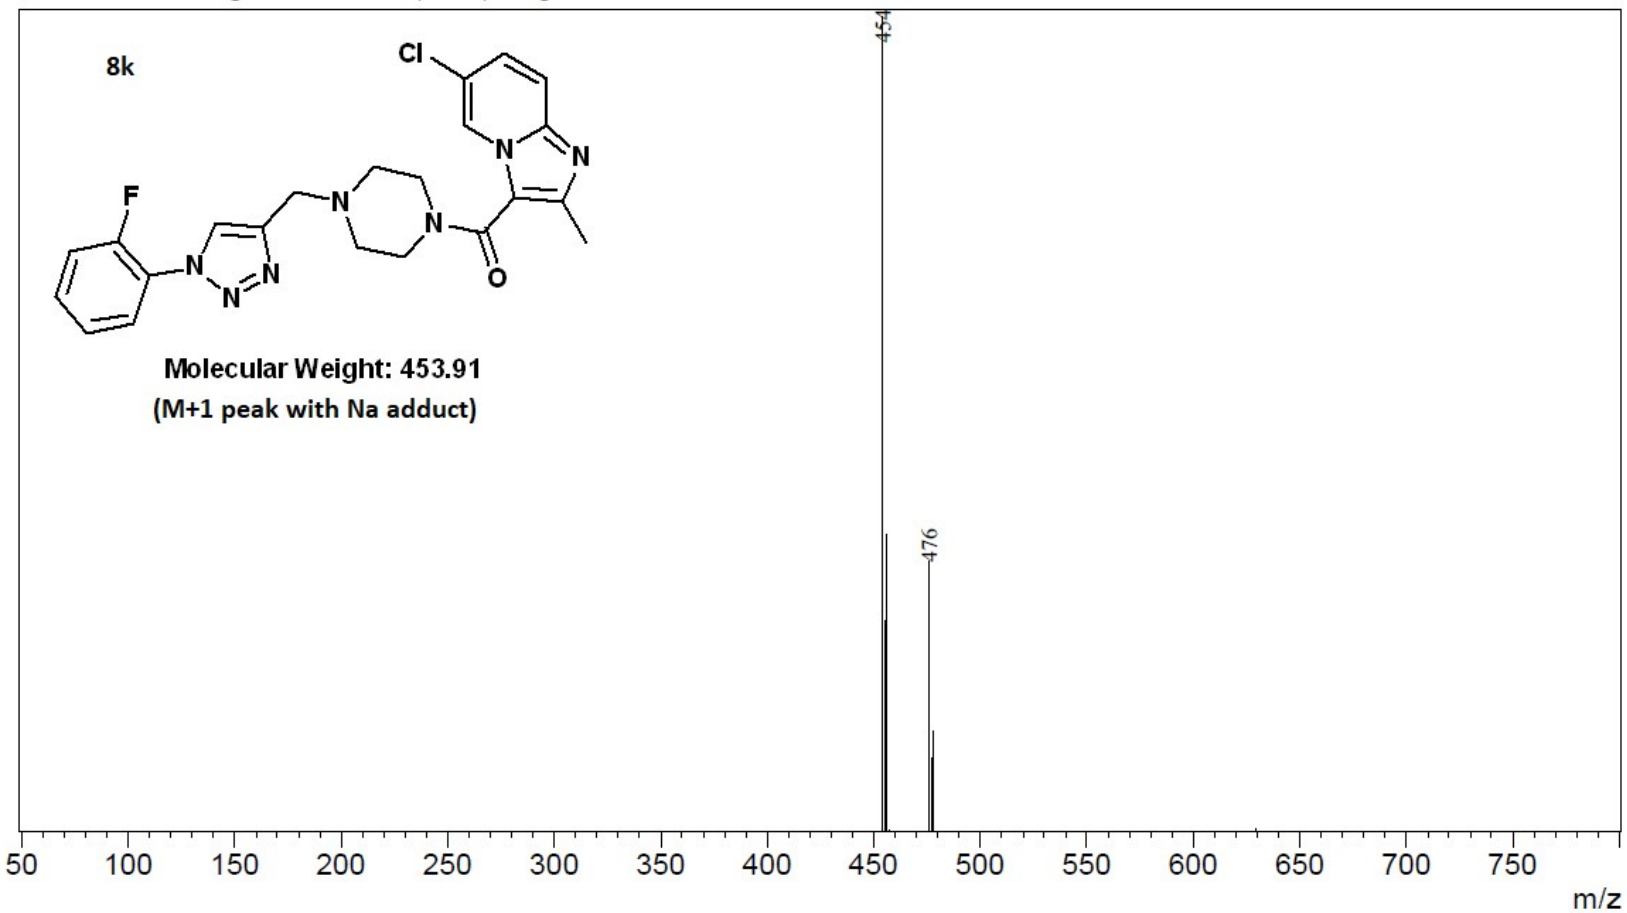

**Mass spectra of compound 8k**

RawMode:Averaged 0.18-0.37(77-155) BasePeak:470(3845423)  
BG Mode:Averaged 0.00-0.16(3-69) Segment 1 - Event 1

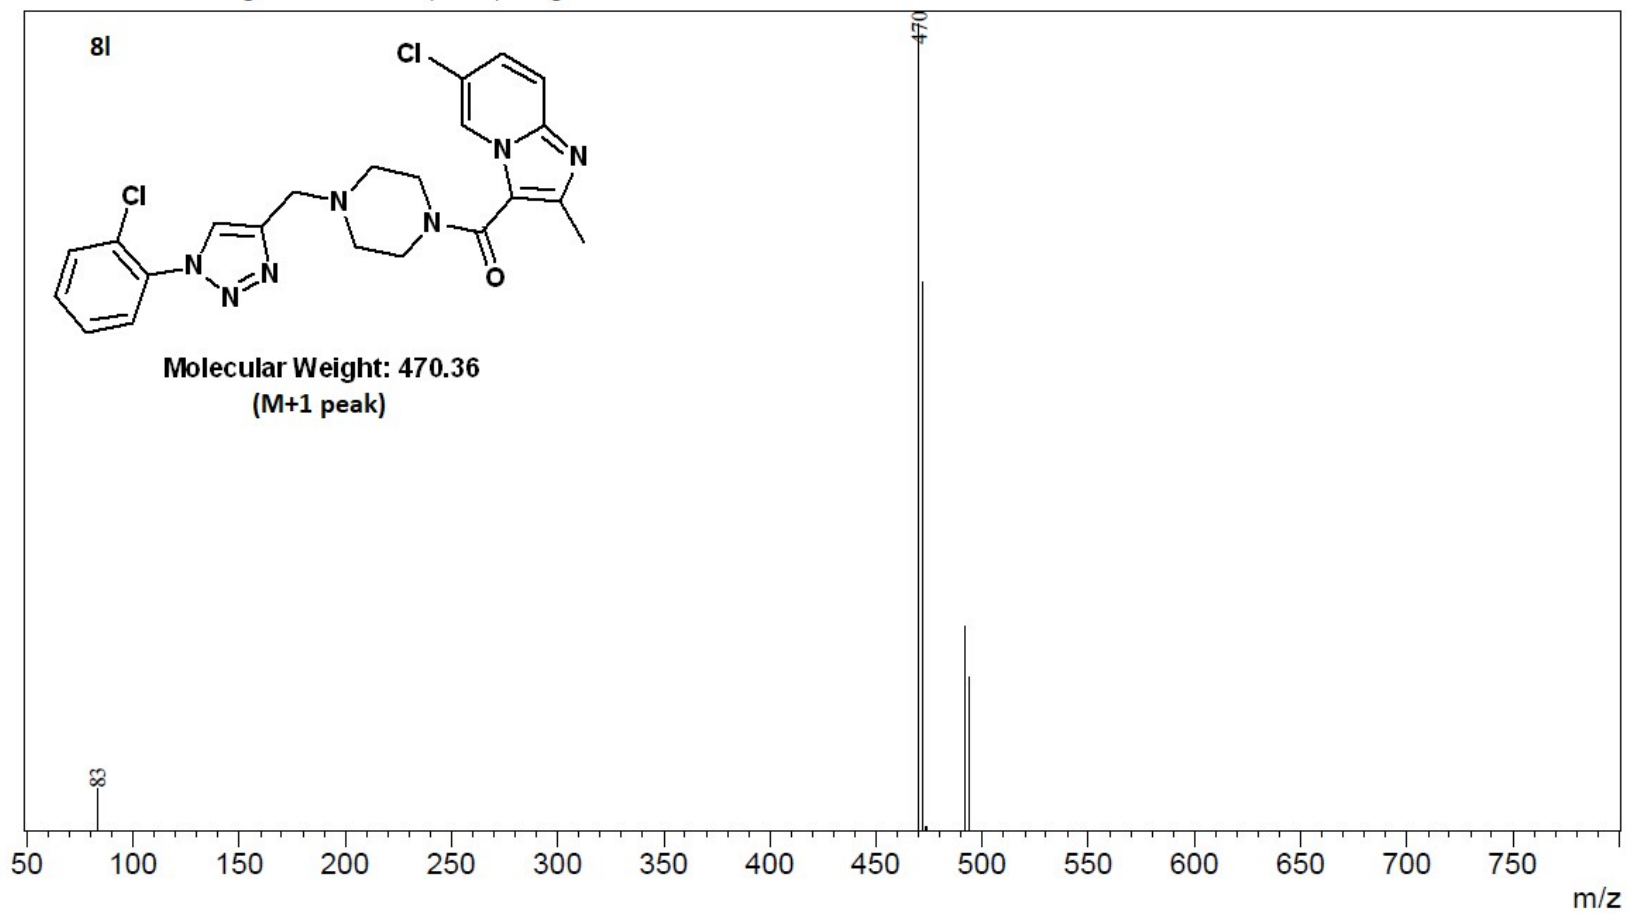

**Mass spectra of compound 8I**

RawMode:Averaged 0.17-0.37(73-155) BasePeak:488(5182078)  
BG Mode:Averaged 0.00-0.16(1-69) Segment 1 - Event 1

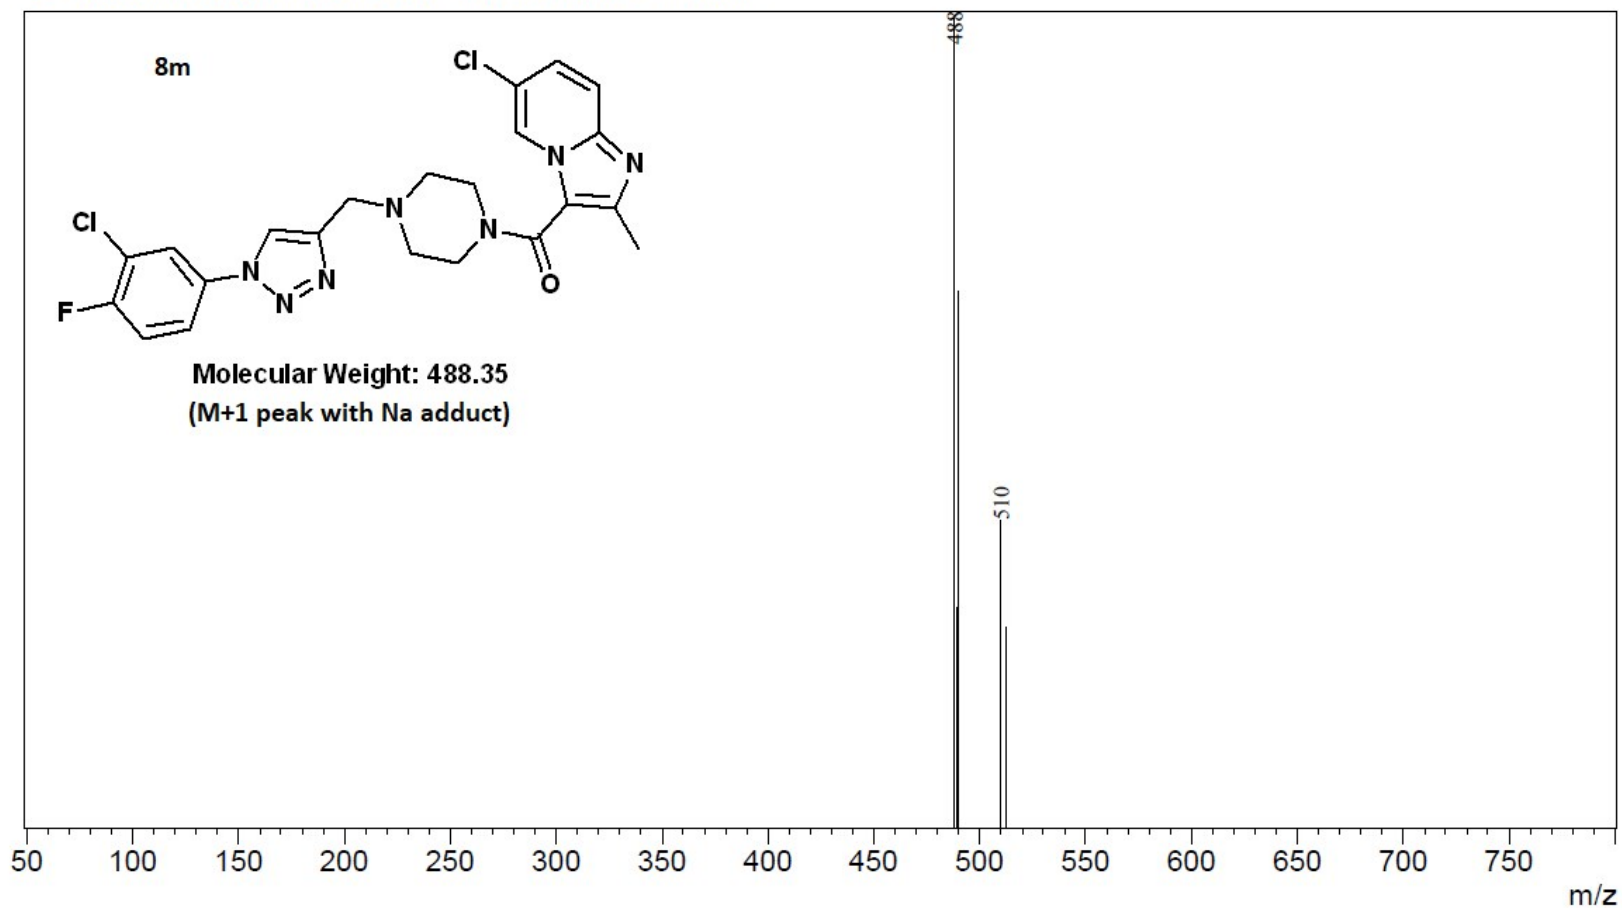

**Mass spectra of compound 8m**

RawMode:Averaged 0.16-0.32(67-133) BasePeak:464(5472142)  
BG Mode:Averaged 0.00-0.16(1-69) Segment 1 - Event 1

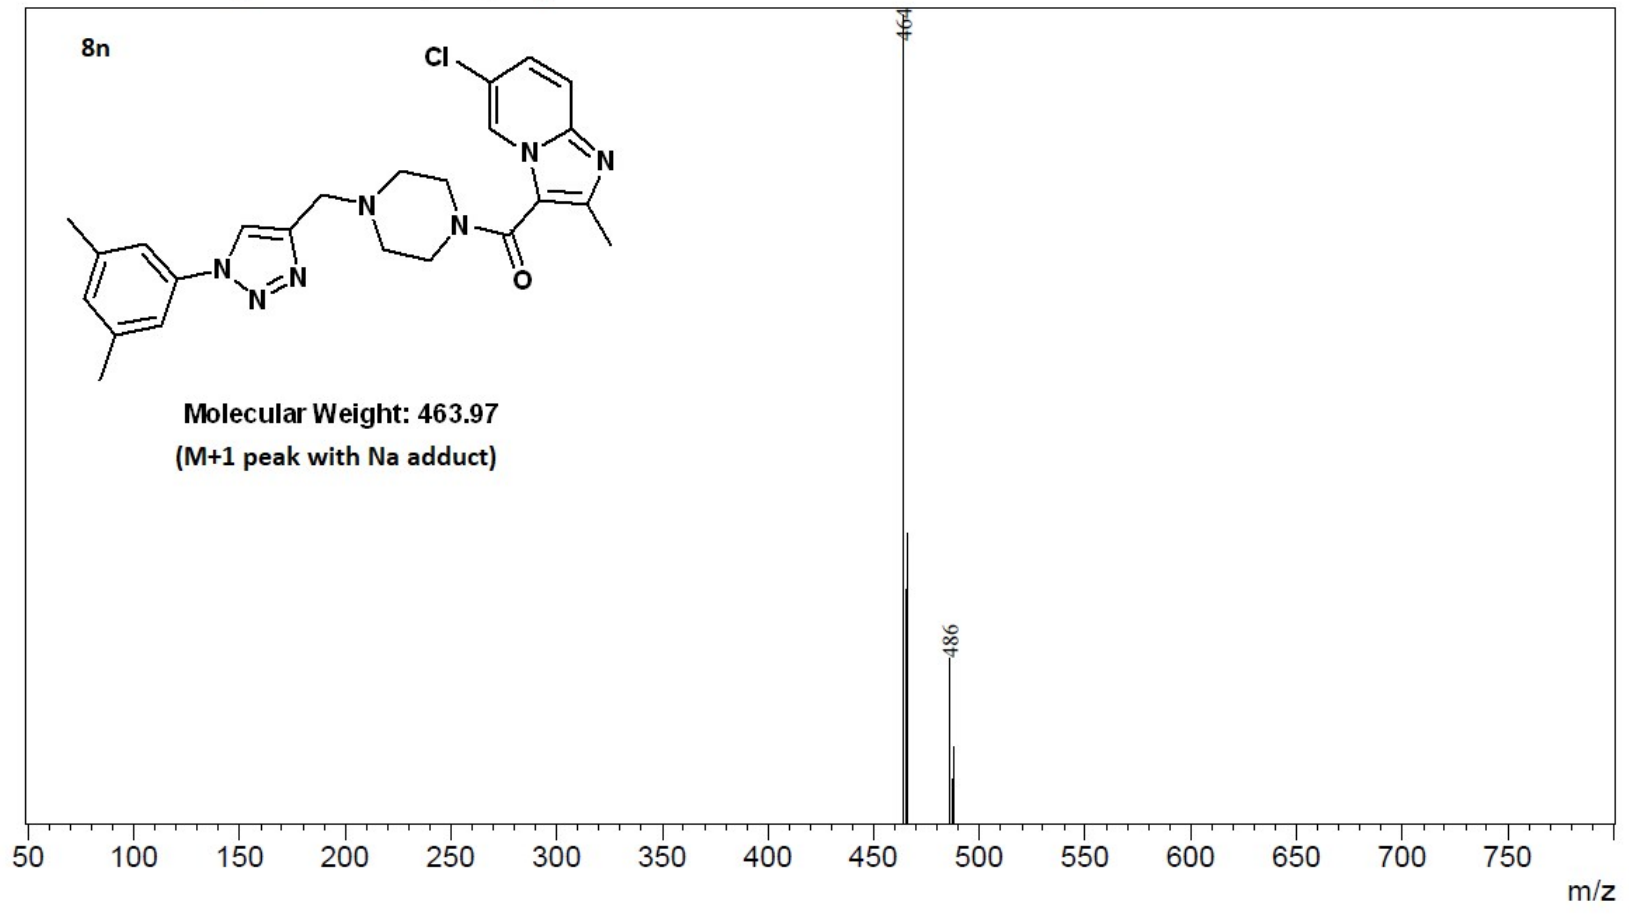

Mass spectra of compound 8n

RawMode:Averaged 0.17-0.39(73-161) BasePeak:464(3174954)  
BG Mode:Averaged 0.00-0.18(1-75) Segment 1 - Event 1

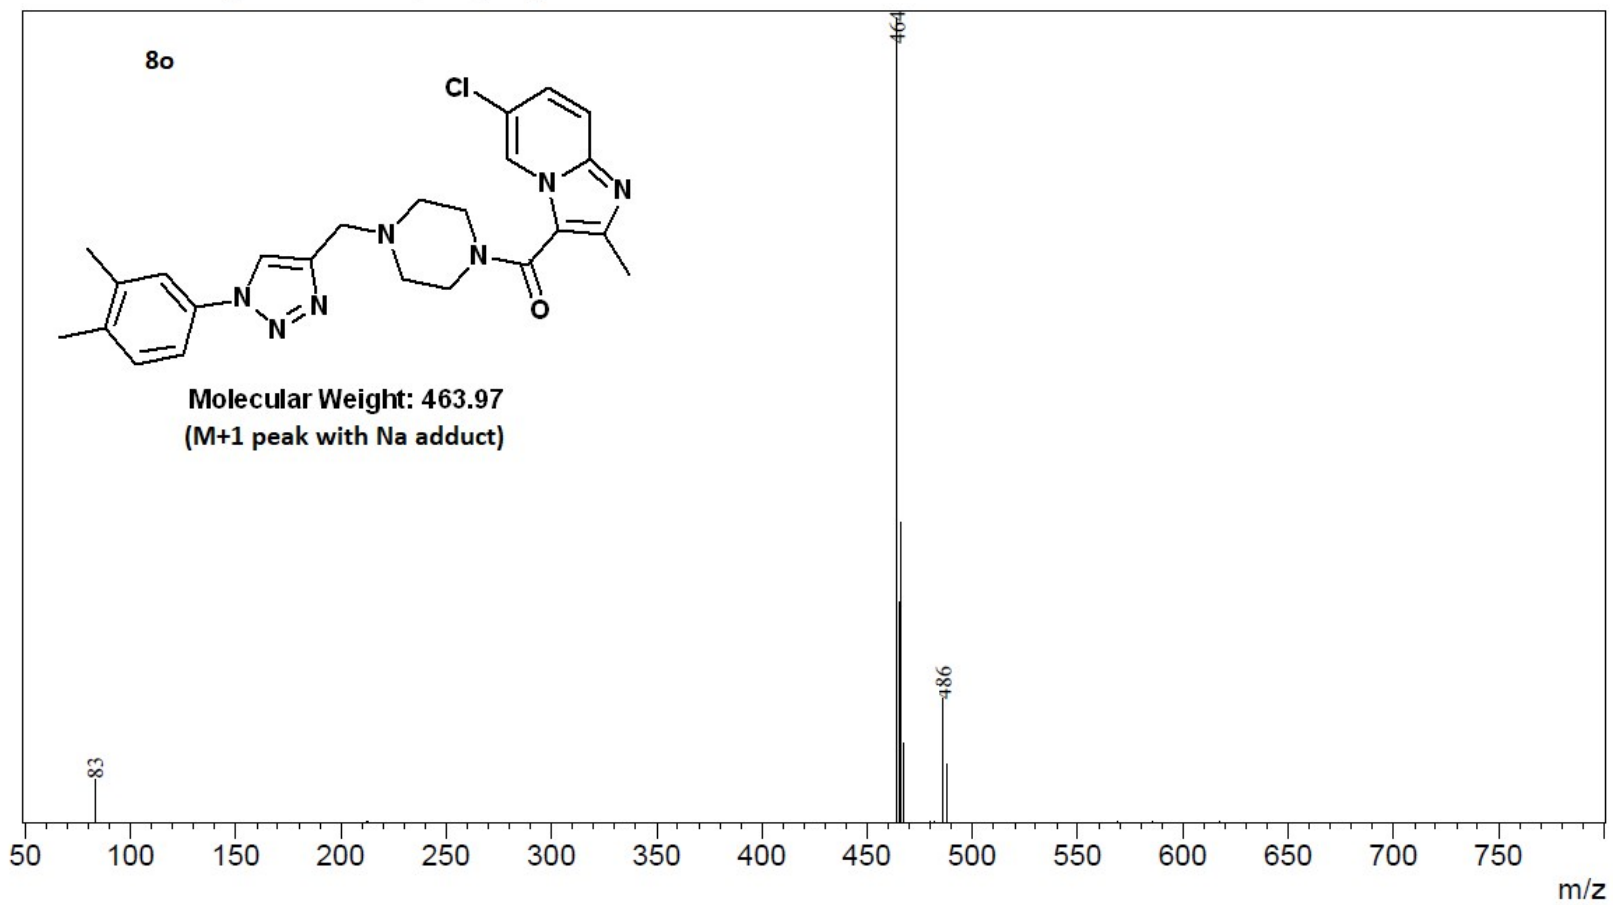

**Mass spectra of compound 8o**



RawMode:Averaged 0.21-0.39(89-161) BasePeak:511(4765240)  
BG Mode:Averaged 0.00-0.23(1-95) Segment 1 - Event 1

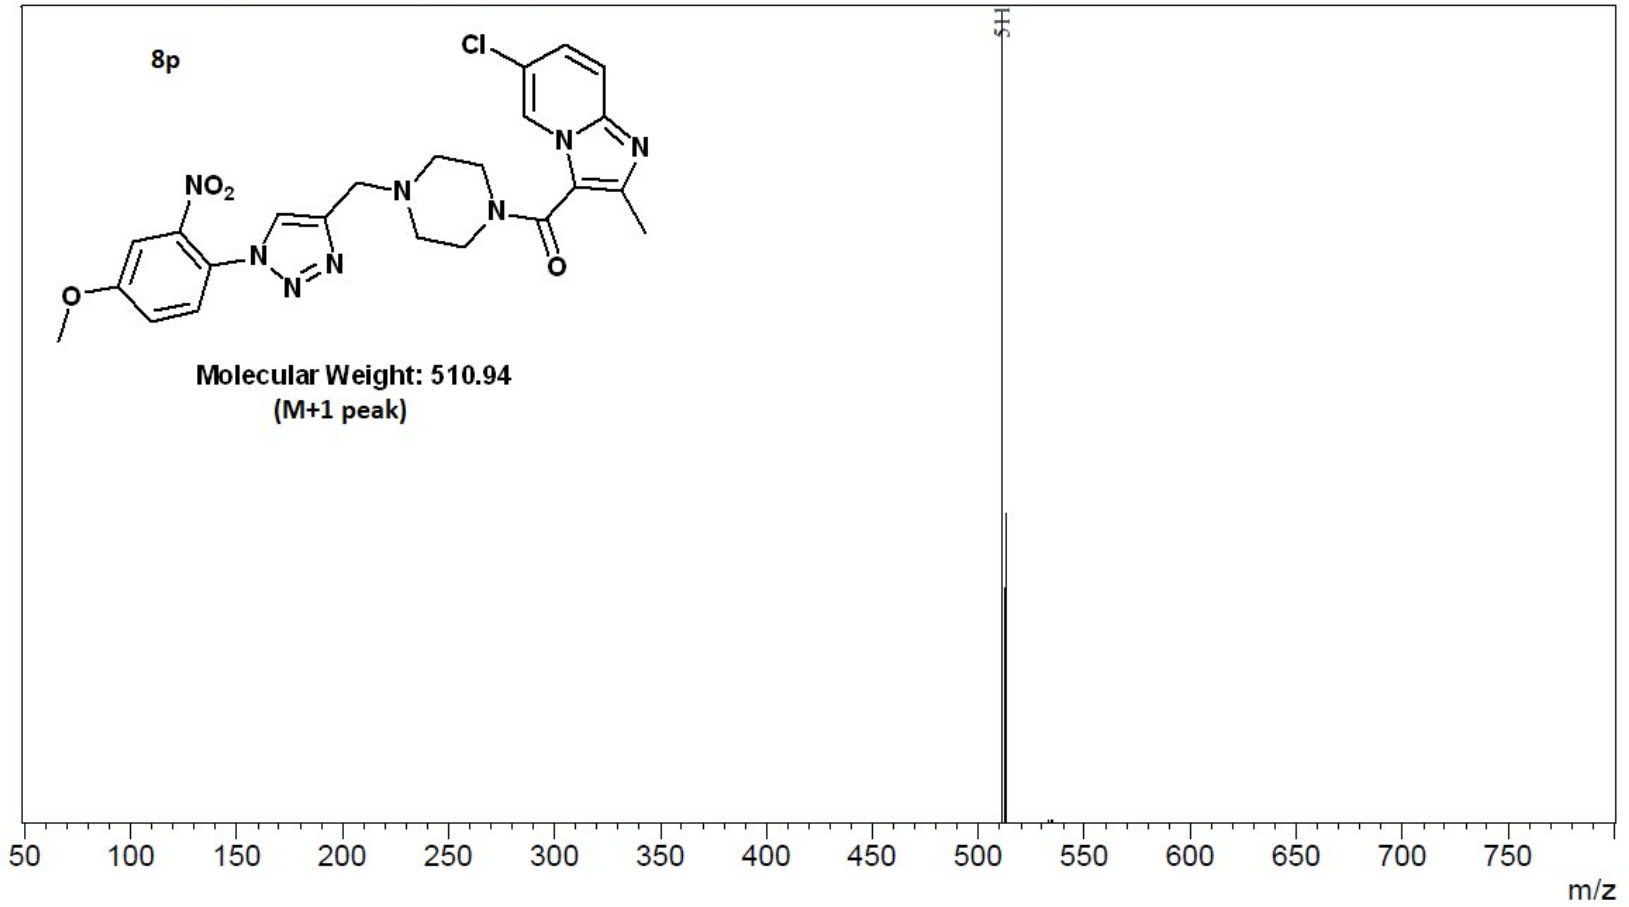

Mass spectra of compound 8p

RawMode:Averaged 0.16-0.35(67-145) BasePeak:396(9139396)  
BG Mode:Averaged 0.00-0.15(1-65) Segment 1 - Event 1

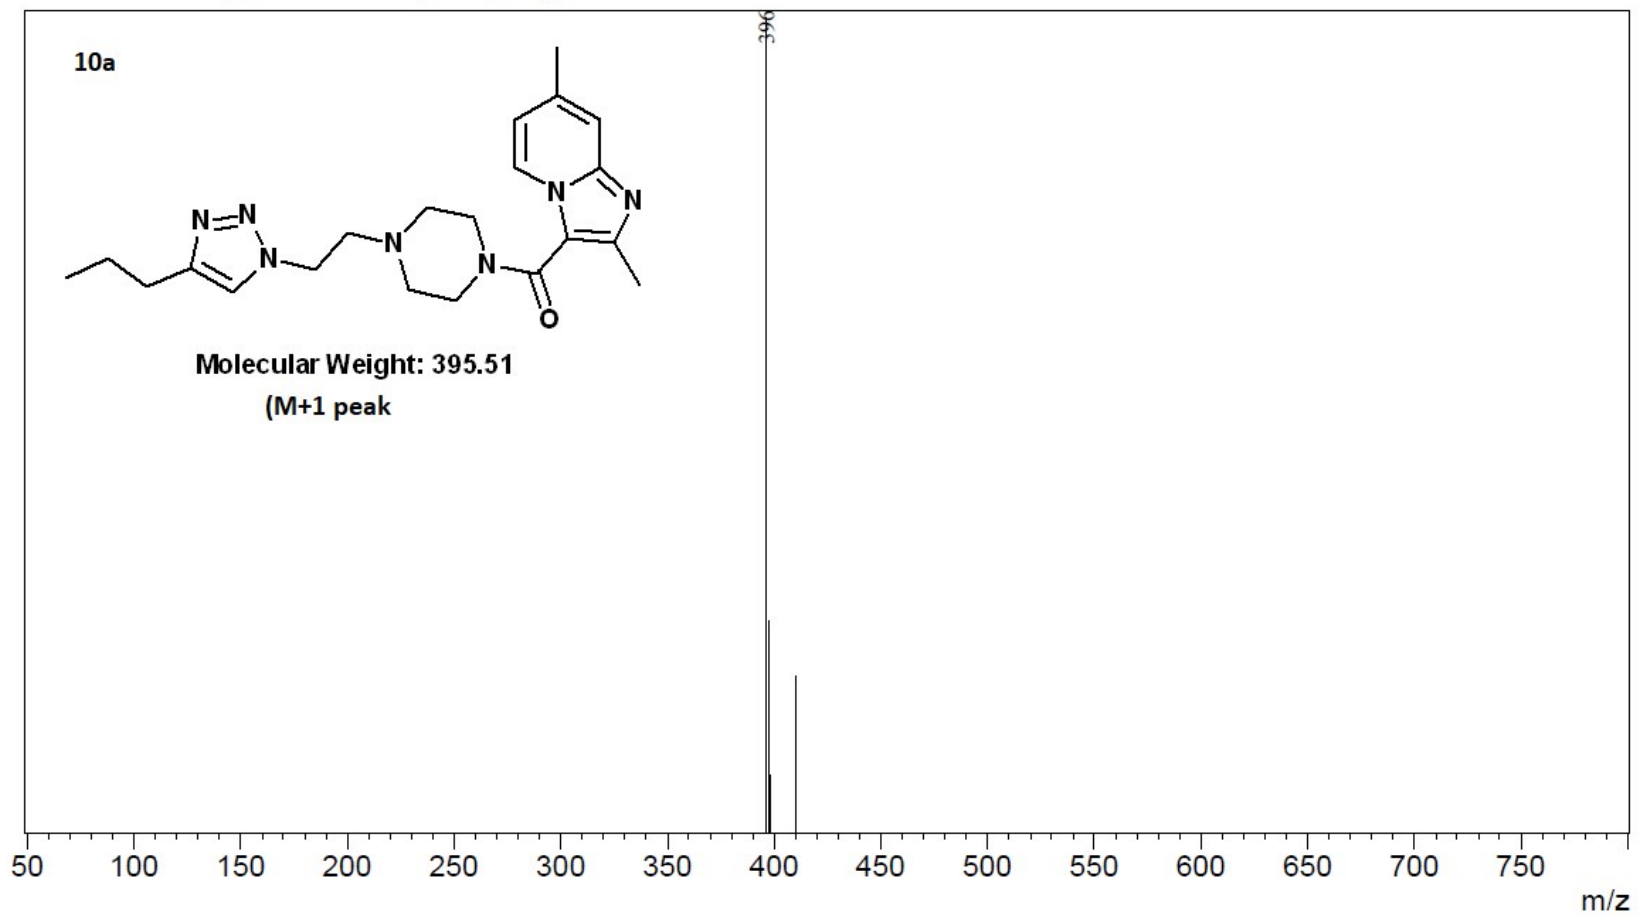

**Mass spectra of compound 10a**

RawMode:Averaged 0.16-0.32(67-135) BasePeak:480(17410703)  
BG Mode:Averaged 0.00-0.16(1-69) Segment 1 - Event 1

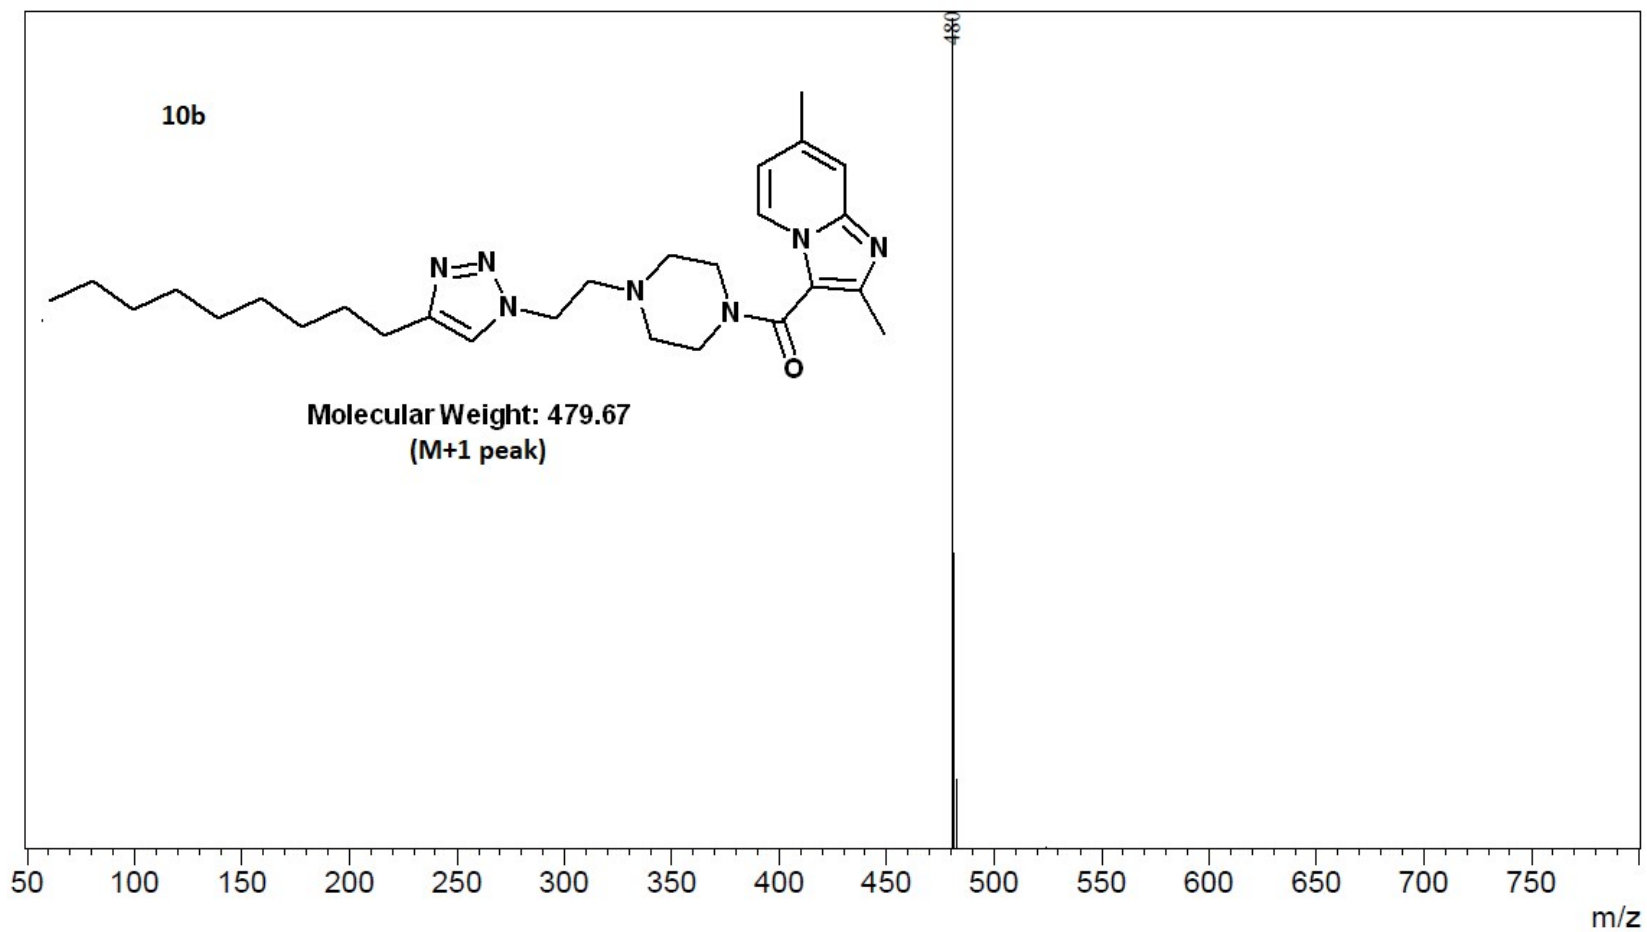

Mass spectra of compound 10b

RawMode:Averaged 0.17-0.33(71-139) BasePeak:394(13031566)  
BG Mode:Averaged 0.00-0.16(1-67) Segment 1 - Event 1

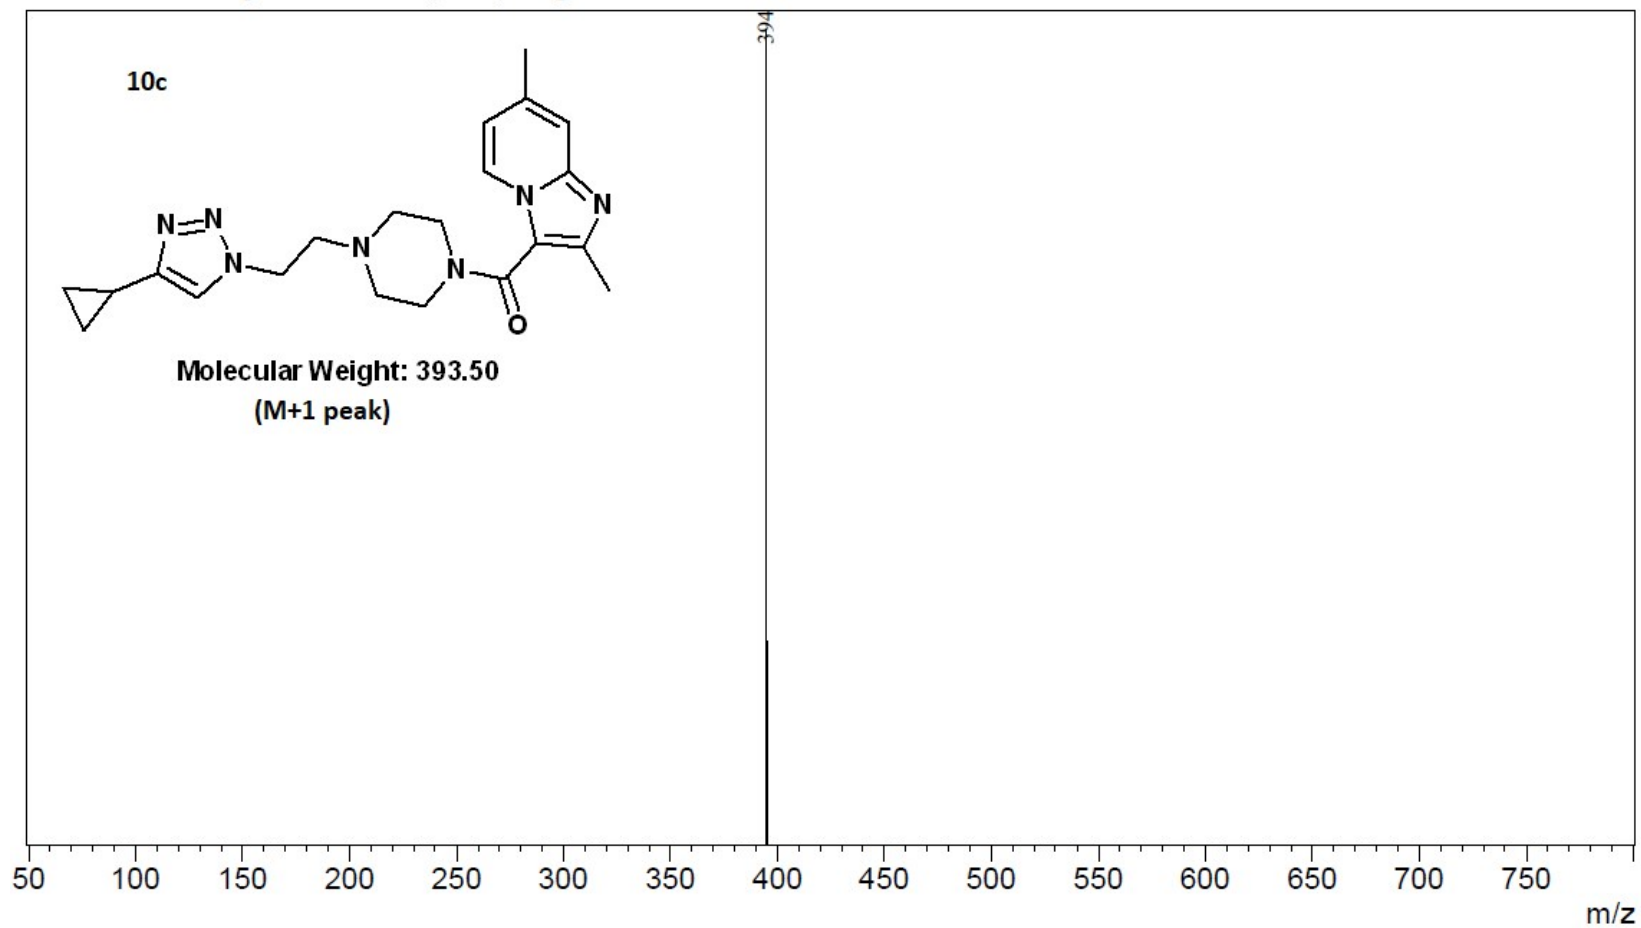

**Mass spectra of compound 10c**

RawMode:Averaged 0.16-0.29(69-121) BasePeak:486(10089459)  
BG Mode:Averaged 0.00-0.16(1-69) Segment 1 - Event 1

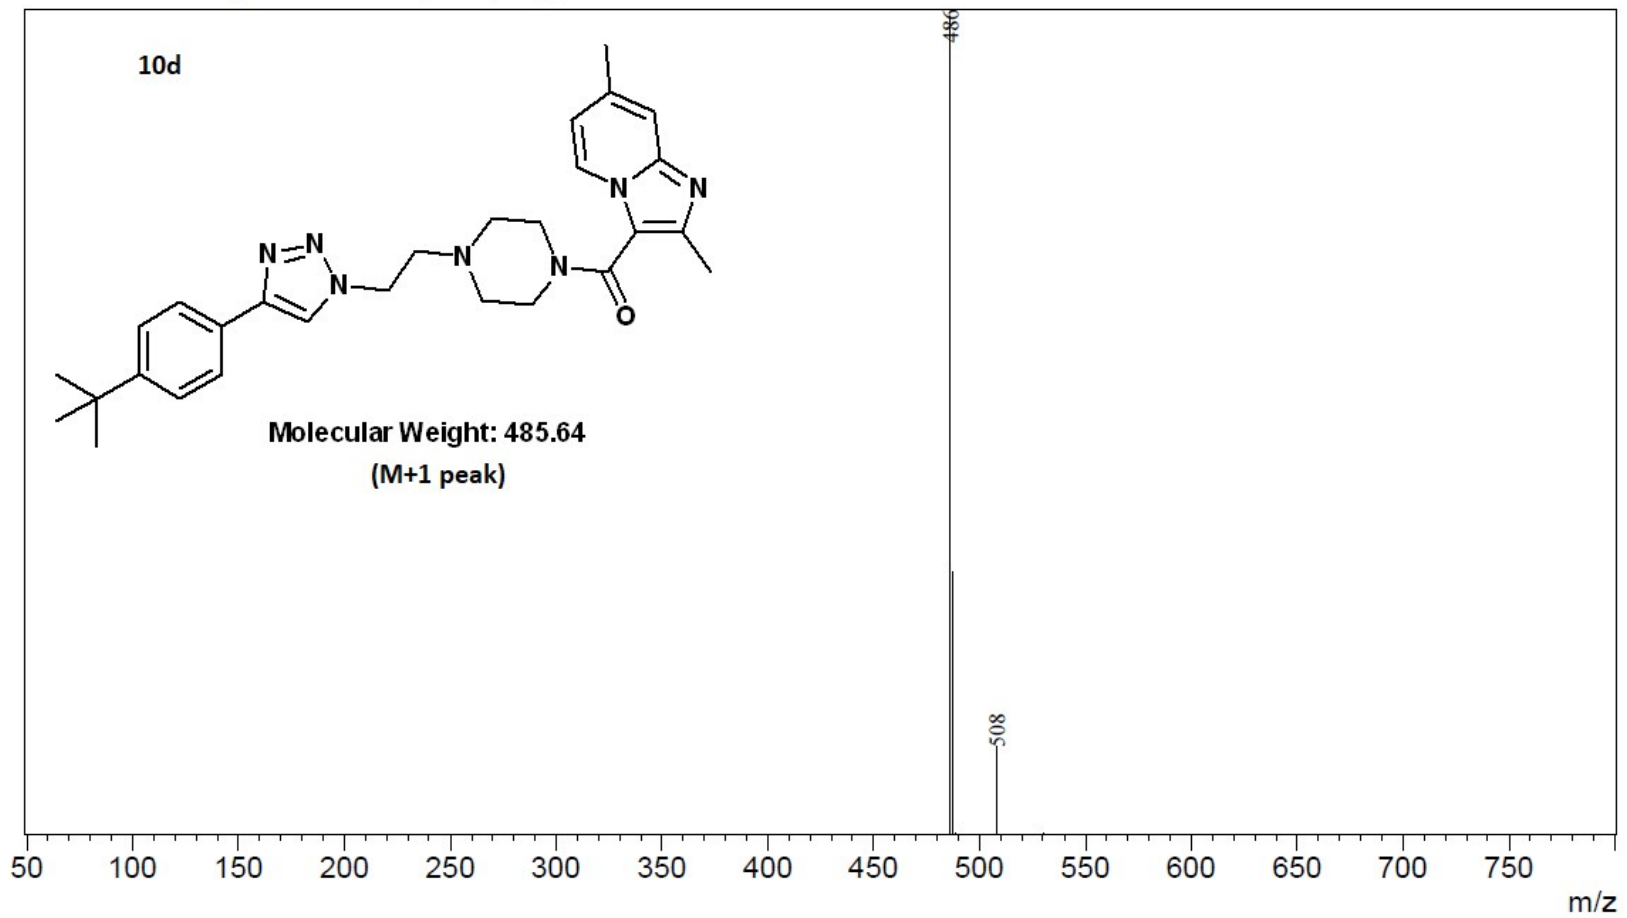

**Mass spectra of compound 10d**

RawMode:Averaged 0.20-0.40(85-167) BasePeak:416(6659508)  
BG Mode:Averaged 0.00-0.16(1-69) Segment 1 - Event 1

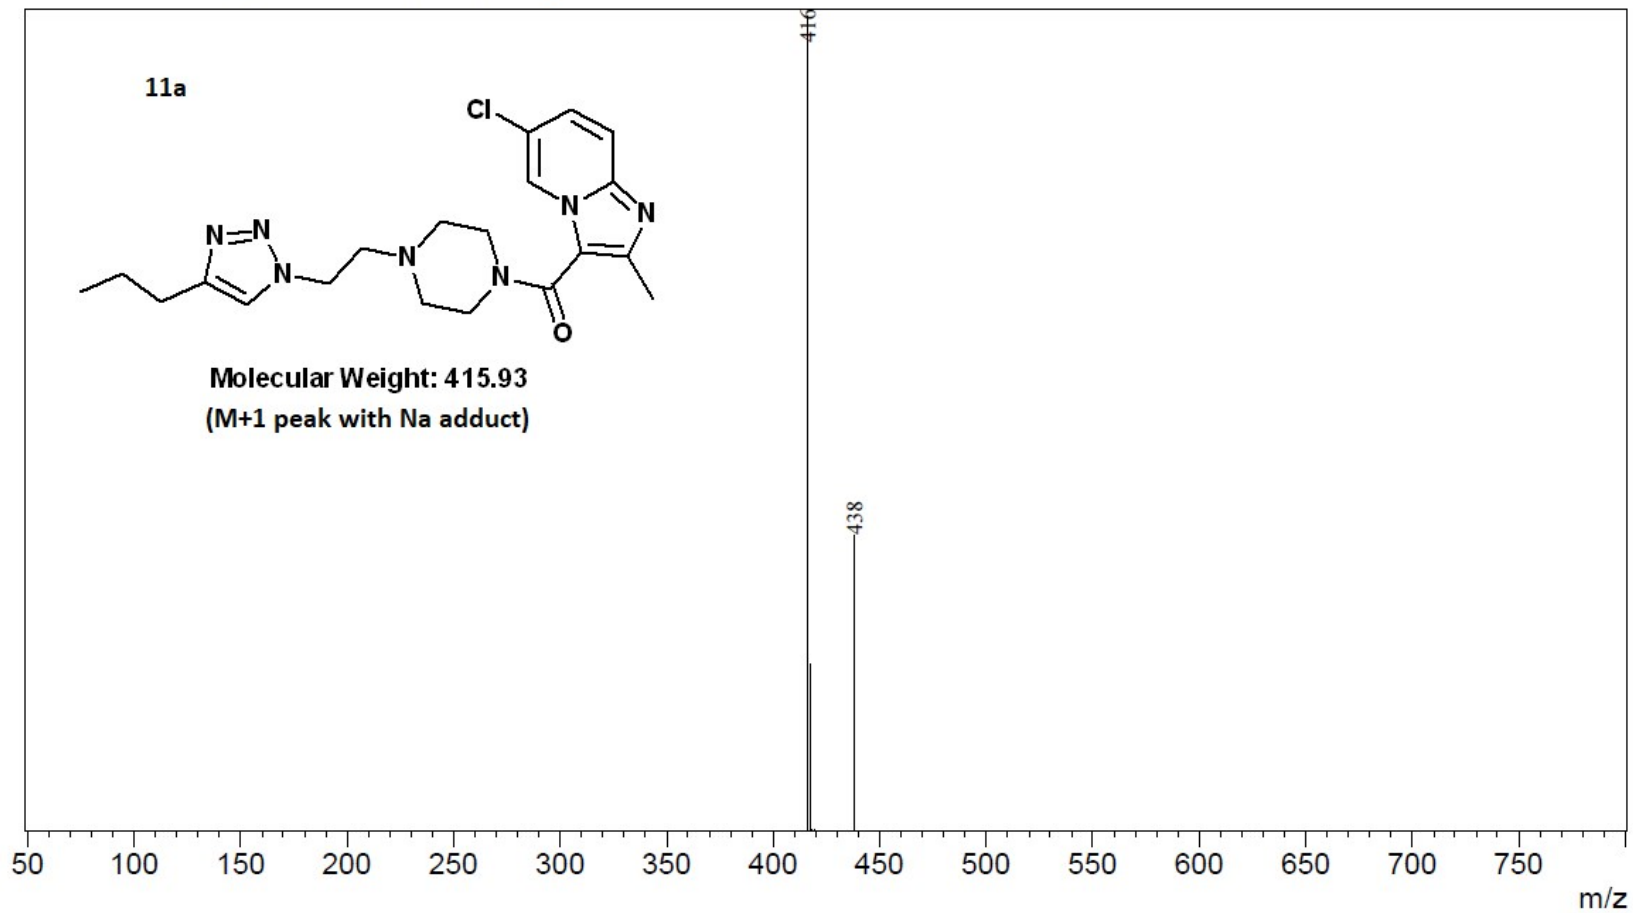

**Mass spectra of compound 11a**

RawMode:Averaged 0.18-0.30(75-127) BasePeak:500(4932881)  
BG Mode:Averaged 0.00-0.20(1-83) Segment 1 - Event 1

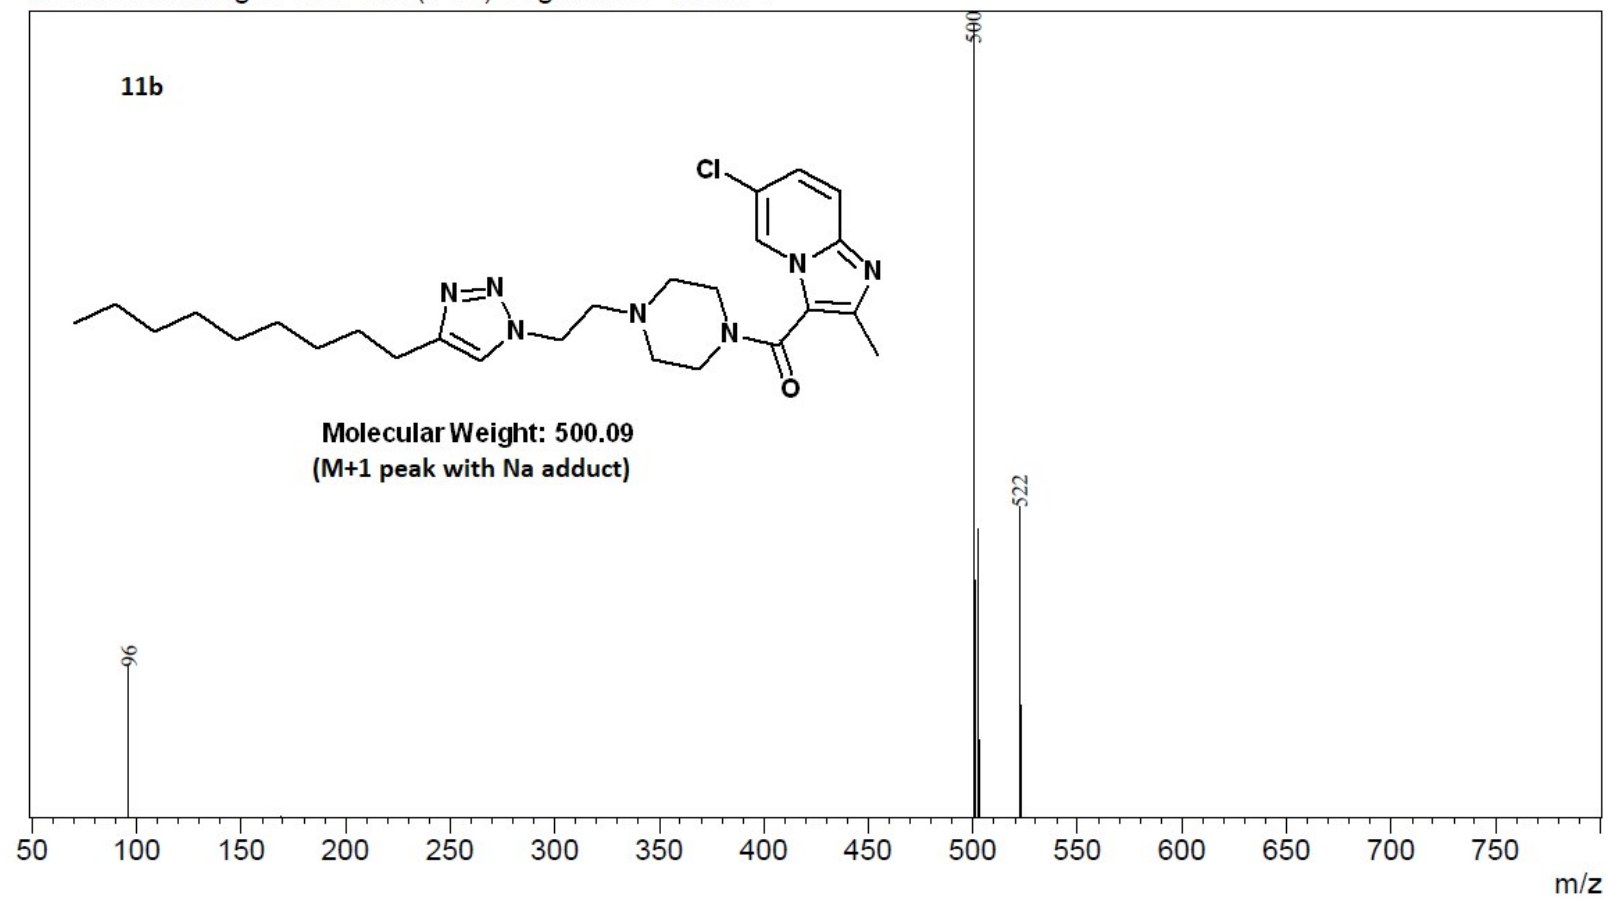

**Mass spectra of compound 11b**

RawMode:Averaged 0.29-0.43(121-177) BasePeak:414(3516622)  
BG Mode:Averaged 0.00-0.26(1-109) Segment 1 - Event 1

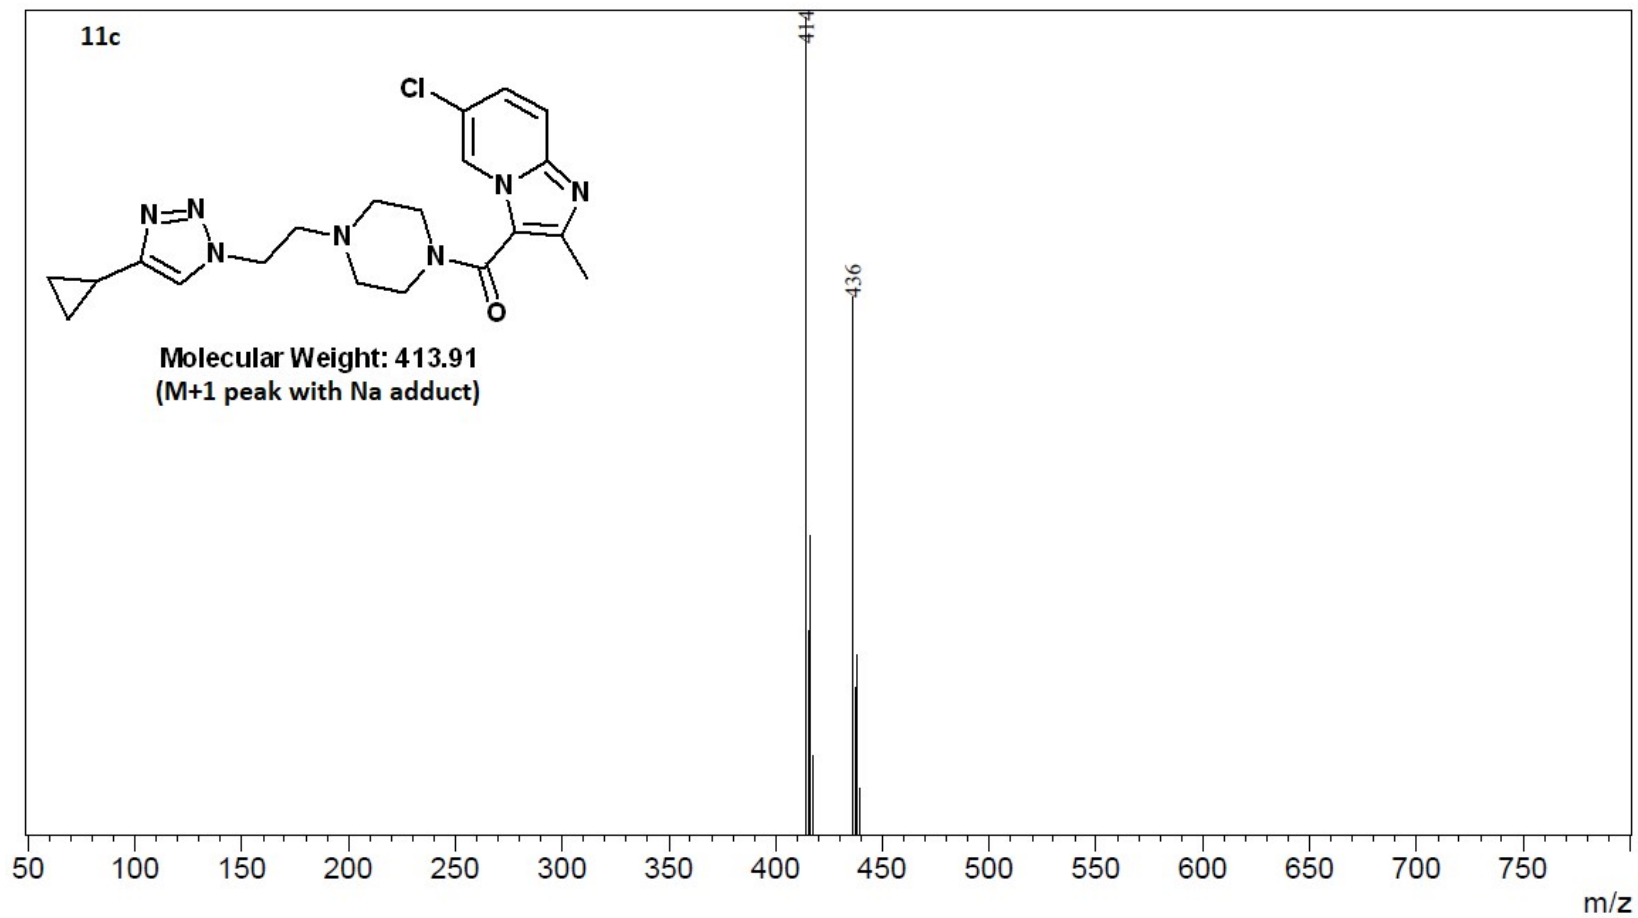

**Mass spectra of compound 11c**



RawMode:Averaged 0.19-0.35(79-145) BasePeak:450(4149440)  
BG Mode:Averaged 0.00-0.16(1-69) Segment 1 - Event 1

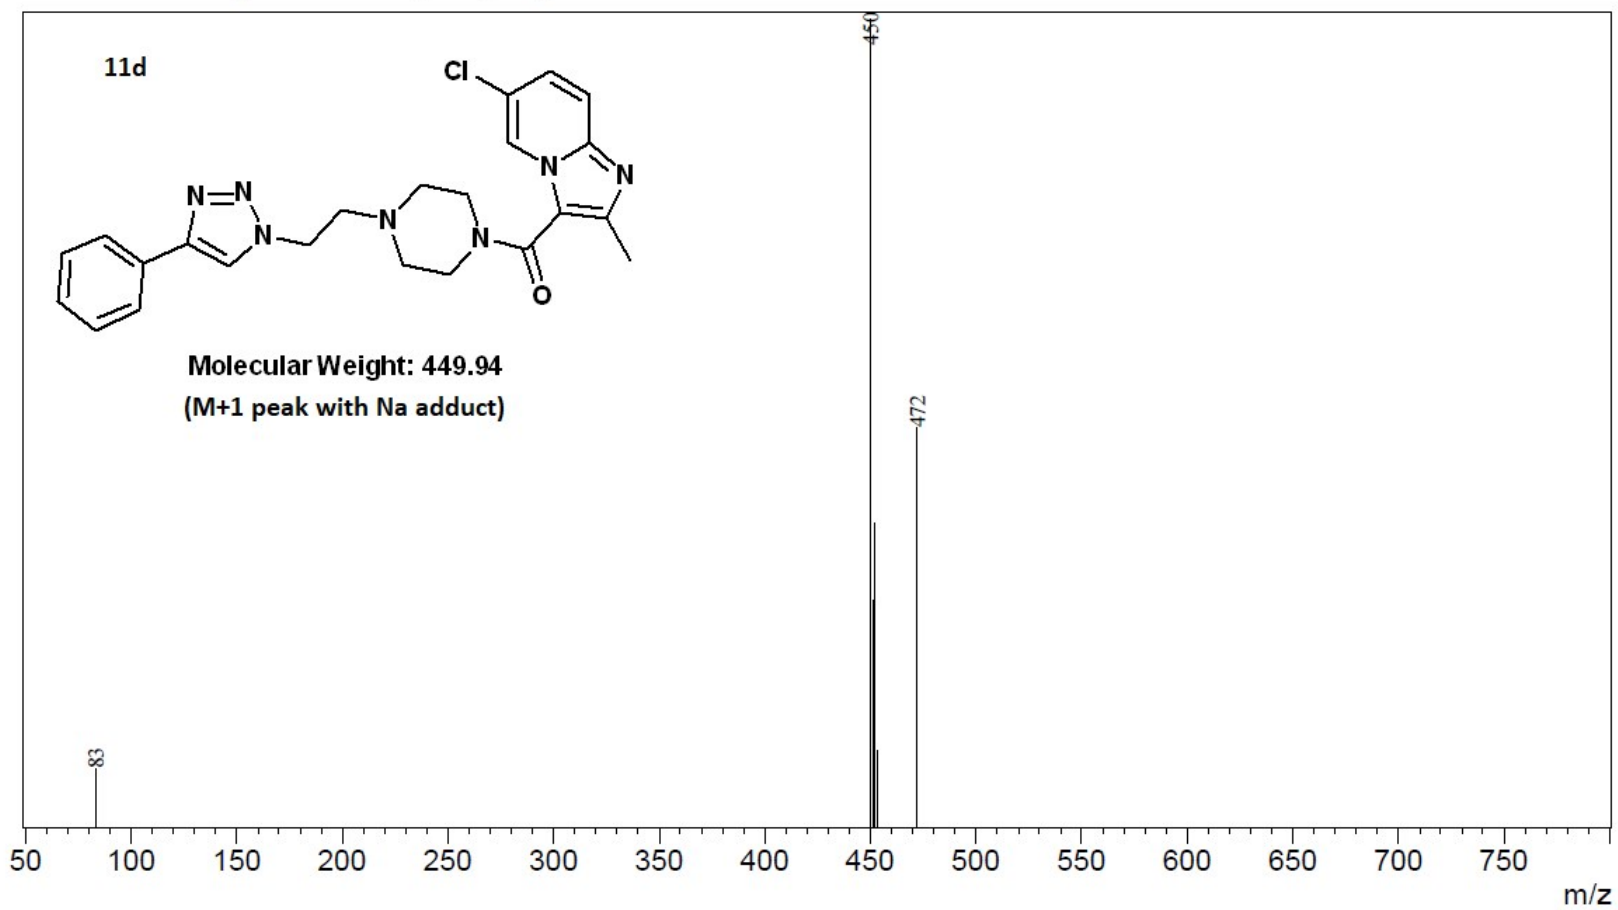

**Mass spectra of compound 11d**

RawMode:Averaged 0.16-0.30(69-127) BasePeak:506(3905661)  
BG Mode:Averaged 0.00-0.15(1-61) Segment 1 - Event 1

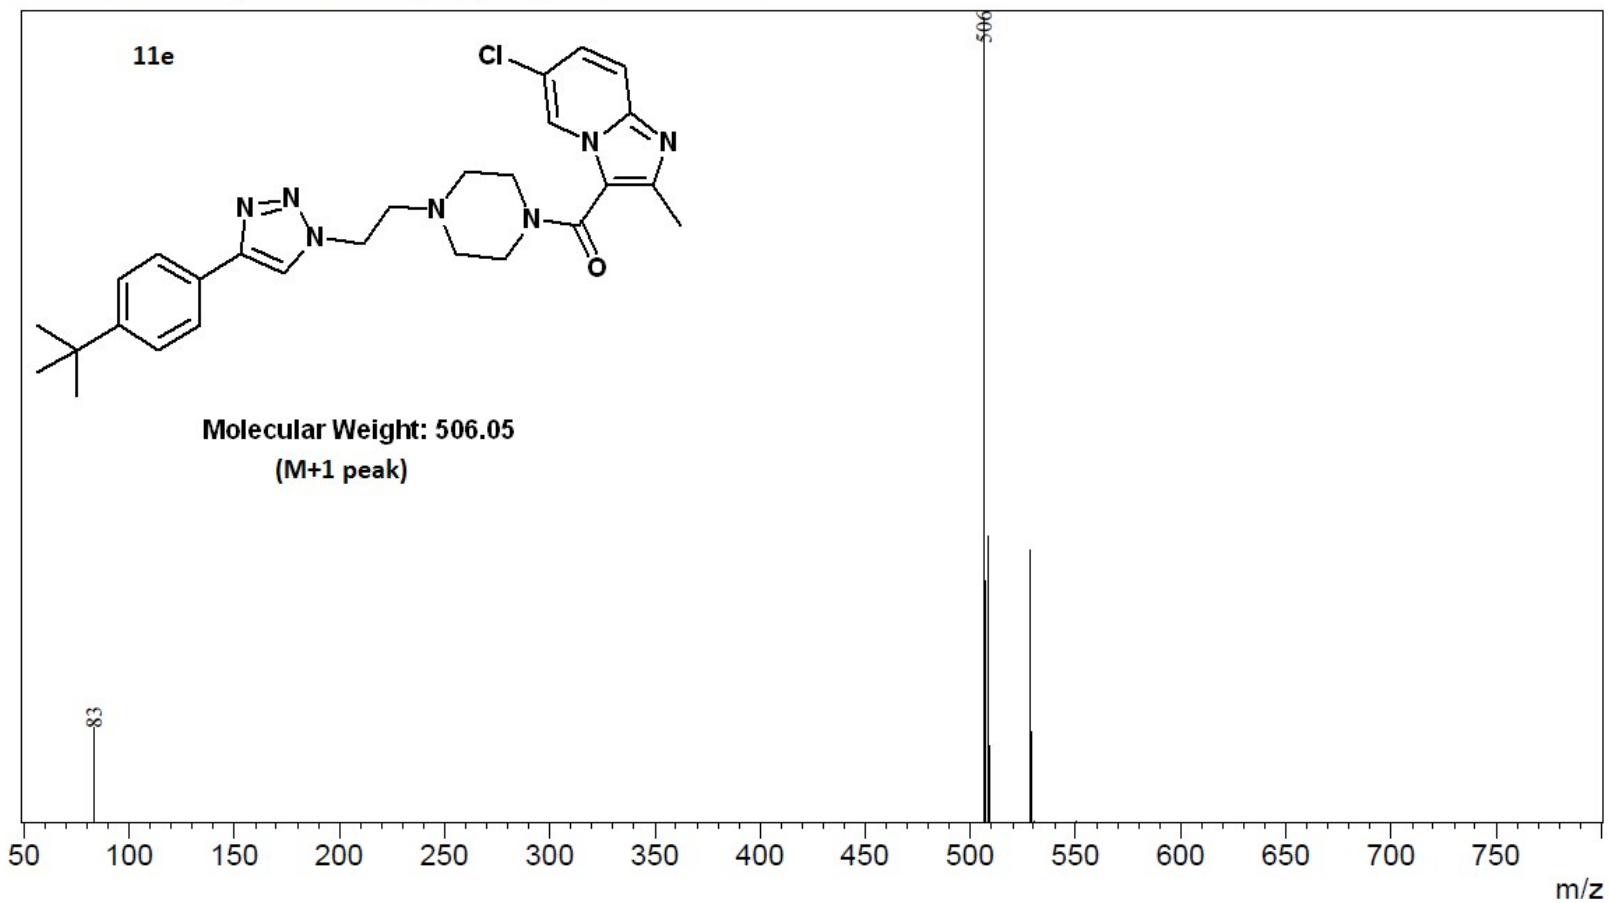

Mass spectra of compound 11e

## 9. References

- [1] P. Ashok, S. Chander, T. K. Smith, R. Prakash Singh, P. N. Jha and M. Sankaranarayanan, *Bioorg. Chem.*, 2019, **84**, 98–105.
- [2] S. O. Oyola, K. J. Evans, T. K. Smith, B.A. Smith, J. D. Hilley, J. C. Mottram, P. M. Kaye and D. F. Smith, *PLoS One*, 2012, **7**, e51300.
- [3] M. De Rycker, I. Hallyburton, J. Thomas, L. Campbell, S. Wyllie, D. Joshi, S. Cameron, I. H. Gilbert, P. G. Wyatt, J. A. Frearson, A. H. Fairlamb and D. W. Gray, *Antimicrob. Agents Chemother.*, 2013, **57**, 2913–2922.
- [4] H. Hirumi and K. Hirumi, *The Journal of Parasitology*, 1989, **75**, 985-989.
- [5] B. Rodenko, A. M. Van Der Burg, M. J. Wanner, M. Kaiser, R. Brun, M. Gould, H. P. De Koning and G. J. Koomen, *Antimicrob. Agents Chemother.*, 2007, **51**, 3796–3802.
- [6] Schrödinger Release 2019-1: QikProp, Schrödinger, LLC, New York, NY, 2019.
- [7] QikProp Descriptors and Properties PISA, 2015, 2–4.
- [8] T. Sander, J. Freyss, M. Von Korff and C. Rufener, *J. Chem. Inf. Model.*, 2015, **55**, 460–473.
- [9] Schrödinger Release 2019-1: Maestro, Schrödinger, LLC, New York, NY, 2019.
- [10] S. K. Burley, H. M. Berman, C. Bhikadiya, C. Bi, L. Chen, L. Di Costanzo, C. Christie, K. Dalenberg, J. M. Duarte, S. Dutta, Z. Feng, S. Ghosh, D. S. Goodsell, R. K. Green, V. Guranović, D. Guzenko, B. P. Hudson, T. Kalro, Y. Liang, R. Lowe, H. Namkoong, E. Peisach, I. Periskova, A. Prlić, C. Randle, A. Rose, P. Rose, R. Sala, M. Sekharan, C. Shao, L. Tan, Y. P. Tao, Y. Valasatava, M. Voigt, J. Westbrook, J. Woo, H. Yang, J. Young, M. Zhuravleva and C. Zardecki, *Nucleic Acids Res.*, 2019, **47**, D464–D474.
- [11] Schrödinger Release 2019-1: LigPrep, Schrödinger, LLC, New York, NY, 2019.
- [12] P. Baiocco, G. Colotti, S. Franceschini and A. Ilari, *J. Med. Chem.*, 2009, **52**, 2603–2612.

- [13] Schrödinger Release 2019-1: Schrödinger Suite 2019-1 Protein Preparation Wizard; Epik, Schrödinger, LLC, New York, NY, 2019.
- [14] R. A. Friesner, J. L. Banks, R. B. Murphy, T. A. Halgren, J. J. Klicic, D. T. Mainz, M. P. Repasky, E. H. Knoll, M. Shelley, J. K. Perry, D. E. Shaw, P. Francis and P. S. Shenkin, *J. Med. Chem.*, 2004, **47**, 1739–1749.
